# Supplementary material for: SECIS elements in the coding regions of selenoprotein transcripts are functional in higher eukaryotes
Source: PubMed Central journal article supplement — Nucleic Acids Res. 2006 Dec 14;35(2):414–23. doi: 10.1093/nar/gkl1060 (PMC1802603; doi:10.1093/nar/gkl1060), 2006-12-14
Supplement: nar_gkl1060_1.pdf [file nar_gkl1060_1.pdf]

**Figure S1. Nucleotide sequence alignment of GPx4 sequences.** Location of SECIS elements is highlighted in red and their conserved regions are indicated.

```

M.musculus      1 ATGAGCTGGGGCCGTCTGAGCCGCTTACTTAAGCCAGCACTGTGTGCGGGGCTCTGGCT
H.sapiens      1 ATGAGCCTCGGGCCGCTTTGCCGCTACTGAAGCCGGCGCTGTCTGTGGGGCTCTGGCC
G.gallus       1 -----
A.thaliana     1 -----
Fowlpox virus  1 -----
Canarypox virus 1 -----

M.musculus      61 GCGCCTGGTCTGGCAGGCACCATGTGCGGATCCCGGATGATTGGGGCTGTGGCGGCTCC
H.sapiens      61 GCGCCTGGCCTGGCCGGGACCATGTGCGGATCCCGGACGACTGGGGCTGTGGCGGCTCC
G.gallus       1 -----ATGTGCGGCTCAGGGGACGAGTGGGGCTCGGCCACCTCC
A.thaliana     1 -----ATGGGTGCTTC-----TCTTCGGTTCGCCAGAGATCC
Fowlpox virus  1 -----ATGATG-----ATGATTGGATATGCACTATACC
Canarypox virus 1 -----ATGGATG-----ACGATTGGATACTTAACATAAT

M.musculus      121 ATGCAAGCAATTCTCAAGCAAGGACATCGACGGGCACATGCTCTCCCTGGATAAGTACAGG
H.sapiens      121 ATGCAAGCAATTTTCGCCAAGGACATCGACGGGCACATGCTTAACCTGGACAAGTACCGG
G.gallus       40 ATCTAGCAATTCACCCCGCGGACATCGACGGGCGGCAATGTGCTCCCTGGAGCAGTACAGG
A.thaliana     34 ATCCATCAATTCCTCAAGGATACCTCCGGCAGGACCTGAATATGAGCATTTACCAA
Fowlpox virus  31 ATTTATGATTTTAACTCAATCTATTAAATGGGACAGCTTTTCACTTAAACATATAAAA
Canarypox virus 31 ATTTATGGATTTAATTTAATCTCATAAATGGAAAAACTTCAAGTTATCCGCTATAAAA

M.musculus      181 GGTTCGTGTGCATCCTCCCAACGTGGCTCGCAATGAGGCAAAACTGACGTAAACTAC
H.sapiens      181 GGTTCGTGTGCATCCTCCCAACGTGGCTCCCAATGAGGCAAGACCGAAGTAAACTAC
G.gallus       100 GGTTCGTGTGCATCCTCCCAACGTGGCTCCCAATGAGGAAAGACCCGGTGAATAC
A.thaliana     94 GGGAAAGTCTCTCACTCAATGTTGCTTCCAAATGCGGTTTACCCGAAACAAACTAT
Fowlpox virus  91 GATAAGTATGTATATTTGTAACGTAGCTTCGAAATGACACTAGCTGACGGAATAT
Canarypox virus 91 GATCGCATATGCTTGTGTTAACGTAGCTAGTGAATGCCACTGCCGATAAAAATAT

M.musculus      241 ACTCAGCTACTCGACTGCAACGCCGATATGCTGACTGTGGTTACGAATCCTGGCCCTC
H.sapiens      241 ACTCAGCTCTCGACTGCAACGCCGATAGGCTGACTGTGGTTGCGGAATCCTGGCCCTC
G.gallus       160 ACTCAGCTCTCGACTGCAACGCCGATAGGCTGACTGTGGTTGCGGAATCCTGGCCCTC
A.thaliana     154 ACTCAGCTCACCAGACTTTACCGGAATATAGGACCAAGATTTGAGATCTTGGCATTC
Fowlpox virus  151 AAGGAATTTCAAAATTTACCAACAGTATTTTTTGTGATGGATTACGTATAATGGCATTT
Canarypox virus 151 AAGGAATTTCAAGACTATATTCCAAATATTTTTATGATGGATTACGTATAATGGCCCTT

M.musculus      301 CCGTGCAACCAGTTTGGGAGCAGGAGCCAGGAGTAATCAAGAAATCAAGGAATTTGCA
H.sapiens      301 CCGTGAACCAGTTTGGGAGCAGGAGCCAGGAGTAACGAAGAGATCAAGGATTTGCC
G.gallus       220 CCGTGCAACCAGTTTGGGAGCAGGAGCCAGGAGTAAAGAGATCAAGGATTTGCC
A.thaliana     214 CTTTGAACCAGTTTCTTACCAAGGAGCCGGCAAACTCAAGAGCTCTGATTAATGGCC
Fowlpox virus  211 CCTTGAACCAGTTTGGTGGACAAGAACAGGTCGTCTCAAGAAATAATGGAAACCATTA
Canarypox virus 211 CCTTGAACCAATTTGGTAAACAAGAACAGGTAATAAAGAGATAATGATACGTTA

M.musculus      361 ---GCCGGCTACAACGTCAAGTTTGCATGTACAGCAAGATCTGTGTAATGGGGACGAT
H.sapiens      361 ---GCCGGCTACAACGTCAAAATTCGATATGTTTCAGCAAGATCTGCTGTAACGGGGACGAC
G.gallus       280 ---GAGGGCTACGGGGTGAAGTTCGACATGTTTCAGCAAAATTTGAGGTCAATGGGGAGGGC
A.thaliana     274 TGCGAATCGCTTTAAGCCCAATACCCCTGTTTTCBAAAAGTACCGGTAAACCGTCAAAAC
Fowlpox virus  271 ---AAGAAATATTCGATATTATTTGATGTGTCGGAAAAGTAATAGTAAATACCATATAC
Canarypox virus 271 ---AAAAATATTCTGTATTATTCGACCTATCTGAAAAGTACTAGTAAATCTATATAC

M.musculus      418 GCCCACCCTCTGTGGAAATGGATGAAAGTCCAGCCCAAGGGCAGGGGCATCCTGGGAAT
H.sapiens      418 GCCCACCCTCTGTGGAAATGGATGAAAGTCCAGCCCAAGGGCAGGGGCATCCTGGGAAT
G.gallus       337 GCCCACCCTCTGTGGAAATGGATGAAAGTCCAGCCCAAGGGCAGGGGCATCCTGGGAAT
A.thaliana     334 CGAGCACCATTTATAATTCCTTAAGG--CAAGTAAA---GCCACCTTCTGGGTTC
Fowlpox virus  328 GGGCATCCCTTTTGGAAATGGTTACAAACAAGGCCTATA---CTGGGATGTGGCCCGGT
Canarypox virus 328 GCTCATCCATTTTGGAAATGGTTACAGACTAGAGCCGCA---CTAGGCEATATAGCCGGT

M.musculus      478 GCCATCAATGGAACCTTACCAAGTTTCTGATGATAAGAACGGCTCCGTGGTGAACCGC
H.sapiens      478 GCCATCAATGGAACCTTACCAAGTTTCTGATGATAAGAACGGCTCCGTGGTGAACCGC
G.gallus       397 GCCATCAATGGAACCTTCACTAAGTTTCTTATCAACCGTGAAGGCCTAAGTGGTGAAGAG
A.thaliana     388 GGAATTAAGTGAACCTTACCAAGTTTCTGATGATAAGAACGGCTTAGTGATTAATCGT
Fowlpox virus  385 CCTATAAATGGAATTTTGTAGTTTCTAATAAGTCCCTTTGGTTACGTTATTAAGAGA
Canarypox virus 385 CCTATCAGATGGAATTTTGTAGTTTCTAATAAGTCCCTTAGGGTTATGTCATTAAGAGA

M.musculus      538 TATGGTCCCATGGAGGACCCCAAGGTGATAGAGAAGGACCTGCCCTTCTATCTCTAG---
H.sapiens      538 TACGGACCATGGAGGACCCCTTGGTATAGAGAAGGACCTGCCCCACTATTTCTAG---
G.gallus       457 TACAGCCCATGGAGGATCCTTACGTGATGAGAAGGATCTGCCCCCTTCTCTAG---
A.thaliana     448 TATGGCACGATGGTTACCCGCTATCNAATGAGAAAGACATCAAGAAAGCTCTTGAAGAC
Fowlpox virus  445 TCCGATCCCTGAGTCAACCCCTATGCTGATCAAAAAGATATAGAACATGTTATAGAACAA
Canarypox virus 445 TACGATCCCGTAAATTAACCTATGAGTATGAAAATGATATAAAAAAGTCATAGAACAA

M.musculus      -----
H.sapiens      -----
G.gallus       -----
A.thaliana     -----
Fowlpox virus  508 GCTTGA-----
Canarypox virus 505 CGTGCTAATGAA GAAATGACTATAAATAGATGGGTGATGCTGACACGCATTTGTTCTGAG
CGAGATAATGAA GAAATGGTCCATAACAGATGGTGGTTCCTGACACCCCGTGTTCGAA

M.musculus      -----
H.sapiens      -----
G.gallus       -----
A.thaliana     -----
Fowlpox virus  565 GAAGAATCTCTTTCTAAAGATGTGTTAAATGACGTATAA---
Canarypox virus 565 GAC-AAT-----AACAAAAACACAGGCGCAGTATACTGA

```

Figure S2. Alignment of GPx4 SECIS elements.

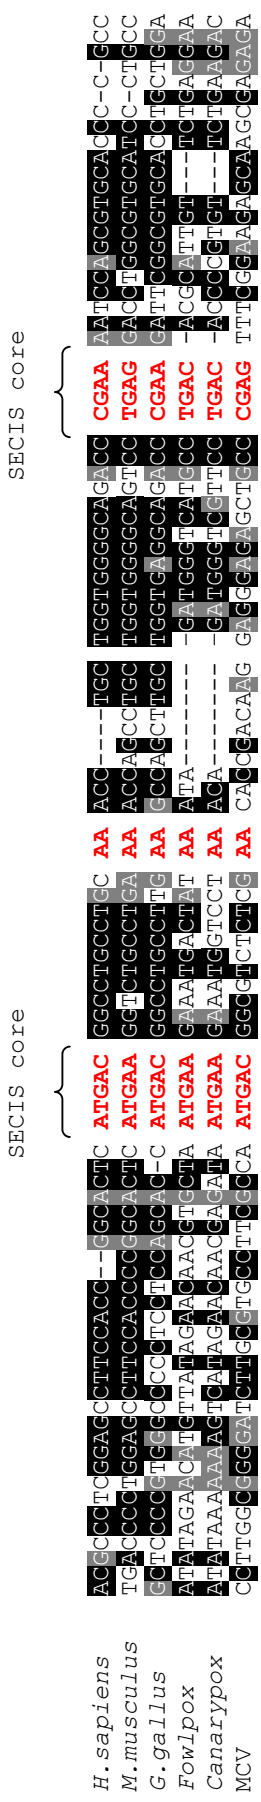

**Supplementary Table S1.**  
**Viral genome sequences used in a computational analysis**

|                                        |       |           |            |             |
|----------------------------------------|-------|-----------|------------|-------------|
| Abelson murine leukemia virus          |       | NC_001499 | 5894 nt    | Jan 12 2004 |
| Abutilon mosaic virus                  | DNA A | NC_001928 | 2632 nt    | Dec 17 2003 |
| Abutilon mosaic virus                  | DNA B | NC_001929 | 2585 nt    | Nov 12 1990 |
| Acanthamoeba polyphaga mimivirus       |       | NC_006450 | 1181404 nt | Aug 1 2003  |
| Acheta domesticus densovirus           |       | NC_004290 | 5234 nt    | Apr 22 2005 |
| Acidianus two-tailed virus             |       | NC_007409 | 62730 nt   | Sep 12 2005 |
| Aconitum latent virus                  |       | NC_002795 | 8657 nt    | Nov 15 2002 |
| Acute bee paralysis virus              |       | NC_002548 | 9491 nt    | Sep 14 2000 |
| Acyrtosiphon pisum virus               |       | NC_003780 | 10035 nt   | Dec 9 1997  |
| Adeno-associated virus - 2             |       | NC_001401 | 4675 nt    | Apr 27 1993 |
| Adeno-associated virus - 3             |       | NC_001729 | 4726 nt    | Jul 11 1996 |
| Adeno-associated virus - 5             |       | NC_006152 | 4642 nt    | Aug 30 2004 |
| Adeno-associated virus 1               |       | NC_002077 | 4718 nt    | Apr 26 1999 |
| Adeno-associated virus 4               |       | NC_001829 | 4767 nt    | Aug 21 1997 |
| Adeno-associated virus 7               |       | NC_006260 | 4721 nt    | Sep 2 2002  |
| Adeno-associated virus 8               |       | NC_006261 | 4393 nt    | Sep 2 2002  |
| Adoxophyes honmai nucleopolyhedrovirus |       | NC_004690 | 113220 nt  | Apr 5 2003  |
| Adoxophyes orana granulovirus          |       | NC_005038 | 99657 nt   | Jul 15 2003 |
| Adult diarrheal rotavirus strain J19   | 1     | NC_007548 | 3538 nt    | Nov 2 2005  |
| Adult diarrheal rotavirus strain J19   | 10    | NC_007557 | 739 nt     | Nov 2 2005  |
| Adult diarrheal rotavirus strain J19   | 11    | NC_007558 | 649 nt     | Nov 2 2005  |
| Adult diarrheal rotavirus strain J19   | 2     | NC_007549 | 2969 nt    | Nov 2 2005  |
| Adult diarrheal rotavirus strain J19   | 3     | NC_007551 | 2204 nt    | Nov 2 2005  |
| Adult diarrheal rotavirus strain J19   | 4     | NC_007550 | 2512 nt    | Nov 2 2005  |
| Adult diarrheal rotavirus strain J19   | 5     | NC_007552 | 1307 nt    | Nov 2 2005  |
| Adult diarrheal rotavirus strain J19   | 6     | NC_007553 | 1287 nt    | Nov 2 2005  |
| Adult diarrheal rotavirus strain J19   | 7     | NC_007555 | 932 nt     | Nov 2 2005  |
| Adult diarrheal rotavirus strain J19   | 8     | NC_007554 | 1004 nt    | Nov 2       |

|                                                |            |           |           |             |
|------------------------------------------------|------------|-----------|-----------|-------------|
|                                                |            |           |           | 2005        |
| Adult diarrheal rotavirus strain J19           | 9          | NC_007556 | 820 nt    | Nov 2 2005  |
| Aedes albopictus densovirus                    |            | NC_004285 | 4176 nt   | Jul 7 1994  |
| Aedes pseudoscutellaris reovirus               | 1          | NC_007666 | 3817 nt   | Nov 23 2005 |
| Aedes pseudoscutellaris reovirus               | 2          | NC_007667 | 3752 nt   | Nov 23 2005 |
| Aedes pseudoscutellaris reovirus               | 3          | NC_007668 | 3732 nt   | Nov 23 2005 |
| Aedes pseudoscutellaris reovirus               | 4          | NC_007669 | 3375 nt   | Nov 23 2005 |
| Aedes pseudoscutellaris reovirus               | 5          | NC_007670 | 3227 nt   | Nov 23 2005 |
| Aedes pseudoscutellaris reovirus               | 6          | NC_007671 | 1775 nt   | Nov 23 2005 |
| Aedes pseudoscutellaris reovirus               | 7          | NC_007672 | 1171 nt   | Nov 23 2005 |
| Aedes pseudoscutellaris reovirus               | 8          | NC_007673 | 1151 nt   | Nov 23 2005 |
| Aedes pseudoscutellaris reovirus               | 9          | NC_007674 | 1147 nt   | Nov 23 2005 |
| African cassava mosaic virus                   | DNA A      | NC_001467 | 2779 nt   | Mar 2 2001  |
| African cassava mosaic virus                   | DNA B      | NC_001468 | 2724 nt   | Mar 2 2001  |
| African green monkey polyomavirus              |            | NC_004763 | 5270 nt   | May 2 2003  |
| African horsesickness virus                    | segment 1  | NC_006021 | 3965 nt   | Jul 13 2004 |
| African horsesickness virus                    | segment 2  | NC_005996 | 3203 nt   | Jul 13 2004 |
| African horsesickness virus                    | segment 3  | NC_006017 | 2792 nt   | Jul 13 2004 |
| African horsesickness virus                    | segment 4  | NC_006012 | 1978 nt   | Jul 13 2004 |
| African horsesickness virus                    | segment 5  | NC_006020 | 1748 nt   | Jul 13 2004 |
| African horsesickness virus                    | segment 6  | NC_006018 | 1566 nt   | Jul 13 2004 |
| African horsesickness virus                    | segment 7  | NC_006011 | 1179 nt   | Jul 13 2004 |
| African horsesickness virus                    | segment 8  | NC_006016 | 1166 nt   | Jul 13 2004 |
| African horsesickness virus                    | segment 9  | NC_006019 | 1169 nt   | Jul 13 2004 |
| African horsesickness virus                    | segment 10 | NC_006009 | 758 nt    | Jul 13 2004 |
| African swine fever virus                      |            | NC_001659 | 170101 nt | Jan 12 2004 |
| Ageratum enation virus                         |            | NC_003434 | 2746 nt   | Mar 4 2002  |
| Ageratum leaf curl disease associated sequence |            | NC_005046 | 1351 nt   | Jul 29 2003 |
| Ageratum leaf curl virus -[G52]                |            | NC_006384 | 2735 nt   | Oct 26 2004 |

|                                                      |           |           |           |             |
|------------------------------------------------------|-----------|-----------|-----------|-------------|
| Ageratum yellow vein China virus                     |           | NC_004090 | 2768 nt   | Jul 30 2002 |
| Ageratum yellow vein China virus-associated DNA beta |           | NC_007067 | 1323 nt   | May 23 2005 |
| Ageratum yellow vein Sri Lanka virus                 |           | NC_002981 | 2748 nt   | Jul 4 2001  |
| Ageratum yellow vein Taiwan virus                    |           | NC_004627 | 2734 nt   | Mar 21 2003 |
| Ageratum yellow vein virus                           |           | NC_004626 | 2741 nt   | Dec 13 1995 |
| Ageratum yellow vein virus-associated DNA beta       |           | NC_003403 | 1347 nt   | Jun 10 2000 |
| Ageratum yellow vein virus-associated nanovirus DNA  |           | NC_003414 | 1360 nt   | Feb 14 2002 |
| Agropyron mosaic virus                               |           | NC_005903 | 9540 nt   | Jul 20 2004 |
| Agrotis segetum granulovirus                         |           | NC_005839 | 131680 nt | Apr 5 2004  |
| Agrotis segetum nucleopolyhedrovirus                 |           | NC_007921 | 147544 nt | Mar 27 2006 |
| Aichi virus                                          |           | NC_001918 | 8251 nt   | Nov 19 2002 |
| Alcelaphine herpesvirus 1                            |           | NC_002531 | 130608 nt | Aug 21 1997 |
| Aleutian mink disease virus                          |           | NC_001662 | 4801 nt   | May 18 1995 |
| Alfalfa mosaic virus                                 | RNA 1     | NC_001495 | 3644 nt   | Aug 2 1993  |
| Alfalfa mosaic virus                                 | RNA 2     | NC_002024 | 2593 nt   | Jul 16 2004 |
| Alfalfa mosaic virus                                 | RNA 3     | NC_002025 | 2037 nt   | Aug 2 1993  |
| Alkhurma virus                                       |           | NC_004355 | 10685 nt  | Jan 8 2003  |
| Alstroemeria virus x                                 |           | NC_007408 | 7009 nt   | Sep 6 2005  |
| Alternanthera mosaic virus                           |           | NC_007731 | 6607 nt   | Jan 25 2006 |
| Alternanthera yellow vein virus                      |           | NC_007211 | 2745 nt   | Aug 2 2005  |
| Amasya cherry disease associated partitivirus        | RNA 1     | NC_006441 | 2002 nt   | Sep 10 2004 |
| Amasya cherry disease associated partitivirus        | RNA 2     | NC_006440 | 1839 nt   | Sep 10 2004 |
| Ambystoma tigrinum virus                             |           | NC_005832 | 106332 nt | Mar 24 2004 |
| American plum line pattern virus                     | RNA 1     | NC_003451 | 3373 nt   | Mar 2 2001  |
| American plum line pattern virus                     | RNA 2     | NC_003452 | 2404 nt   | Mar 2 2001  |
| American plum line pattern virus                     | RNA 3     | NC_003453 | 2053 nt   | Mar 2 2001  |
| Amsacta moorei entomopoxvirus                        |           | NC_002520 | 232392 nt | Mar 7 2002  |
| Andes virus                                          | Segment L | NC_003468 | 6562 nt   | Oct 10 2000 |
| Andes virus                                          | Segment M | NC_003467 | 3671 nt   | Oct 10 2000 |
| Andes virus                                          | Segment S | NC_003466 | 1871 nt   | Oct 10      |

|                                          |           |           |          |             |
|------------------------------------------|-----------|-----------|----------|-------------|
|                                          |           |           |          | 2000        |
| Angelonia flower break virus             |           | NC_007733 | 3964 nt  | Jan 25 2006 |
| Aphid lethal paralysis virus             |           | NC_004365 | 9812 nt  | Nov 14 2002 |
| Apoi virus                               |           | NC_003676 | 10116 nt | Jan 13 2003 |
| Apple chlorotic leaf spot virus          |           | NC_001409 | 7555 nt  | Apr 28 1993 |
| Apple latent spherical virus             | RNA 1     | NC_003787 | 6812 nt  | Nov 15 2002 |
| Apple latent spherical virus             | RNA 2     | NC_003788 | 3384 nt  | Nov 15 2002 |
| Apple mosaic virus                       | RNA 1     | NC_003464 | 3476 nt  | Sep 19 1999 |
| Apple mosaic virus                       | RNA 2     | NC_003465 | 2979 nt  | Sep 19 1999 |
| Apple mosaic virus                       | RNA 3     | NC_003480 | 2056 nt  | Nov 5 1994  |
| Apple stem grooving virus                |           | NC_001749 | 6495 nt  | May 26 1993 |
| Apple stem pitting virus                 |           | NC_003462 | 9306 nt  | May 17 1994 |
| Apricot pseudo-chlorotic leaf spot virus |           | NC_006946 | 7494 nt  | Apr 7 2005  |
| Aquareovirus A                           | 1         | NC_007582 | 3947 nt  | Nov 7 2005  |
| Aquareovirus A                           | 11        | NC_007591 | 783 nt   | Nov 7 2005  |
| Aquareovirus A                           | 2         | NC_007583 | 3867 nt  | Nov 7 2005  |
| Aquareovirus A                           | 3         | NC_007584 | 3690 nt  | Nov 7 2005  |
| Aquareovirus A                           | 4         | NC_007585 | 1619 nt  | Nov 7 2005  |
| Aquareovirus A                           | 5         | NC_007586 | 2242 nt  | Nov 7 2005  |
| Aquareovirus A                           | 6         | NC_007592 | 2052 nt  | Nov 7 2005  |
| Aquareovirus A                           | 7         | NC_007587 | 1395 nt  | Nov 7 2005  |
| Aquareovirus A                           | 8         | NC_007588 | 1317 nt  | Nov 7 2005  |
| Aquareovirus A                           | 9         | NC_007589 | 1118 nt  | Nov 7 2005  |
| Aquareovirus C                           | segment 1 | NC_005166 | 3949 nt  | Nov 3 2003  |
| Aquareovirus C                           | segment 2 | NC_005167 | 3877 nt  | Nov 3 2003  |
| Aquareovirus C                           | segment 3 | NC_005168 | 3702 nt  | Nov 3 2003  |
| Aquareovirus C                           | segment 4 | NC_005169 | 2320 nt  | Nov 3 2003  |
| Aquareovirus C                           | segment 5 | NC_005170 | 2239 nt  | Nov 3 2003  |
| Aquareovirus C                           | segment 6 | NC_005171 | 2039 nt  | Nov 3 2003  |

|                                             |            |           |           |             |
|---------------------------------------------|------------|-----------|-----------|-------------|
| Aquareovirus C                              | segment 7  | NC_005172 | 1414 nt   | Nov 3 2003  |
| Aquareovirus C                              | segment 8  | NC_005173 | 1297 nt   | Nov 3 2003  |
| Aquareovirus C                              | segment 9  | NC_005174 | 1130 nt   | Nov 3 2003  |
| Aquareovirus C                              | segment 10 | NC_005175 | 909 nt    | Nov 3 2003  |
| Aquareovirus C                              | segment 11 | NC_005176 | 820 nt    | Nov 3 2003  |
| Arabis mosaic virus                         | RNA 1      | NC_006057 | 7334 nt   | Jul 23 2004 |
| Arabis mosaic virus                         | RNA 2      | NC_006056 | 3820 nt   | Jul 22 2004 |
| Arabis mosaic virus satellite RNA           |            | NC_003523 | 1104 nt   | Apr 29 1993 |
| Arabis mosaic virus small satellite RNA     |            | NC_001546 | 300 nt    | Aug 3 1993  |
| Arctic ground squirrel hepatitis B virus    |            | NC_001719 | 3302 nt   | Aug 9 1995  |
| Artichoke mottled crinkle virus             |            | NC_001339 | 4789 nt   | May 29 1992 |
| Ateline herpesvirus 3                       |            | NC_001987 | 108409 nt | Dec 16 1998 |
| Atkinsonella hypoxylon partitivirus         | segment 1  | NC_003470 | 2180 nt   | Jan 27 1995 |
| Atkinsonella hypoxylon partitivirus         | segment 2  | NC_003471 | 2135 nt   | Jan 27 1995 |
| Atkinsonella hypoxylon partitivirus         | segment 3  | NC_003472 | 1790 nt   | Jan 27 1995 |
| Atlantic salmon swim bladder sarcoma virus  |            | NC_007654 | 10305 nt  | Dec 1 2005  |
| Aura virus                                  |            | NC_003900 | 11824 nt  | Apr 9 2003  |
| Australian bat lyssavirus                   |            | NC_003243 | 11822 nt  | Aug 10 1999 |
| Autographa californica nucleopolyhedrovirus |            | NC_001623 | 133894 nt | Mar 8 1999  |
| Avian adeno-associated virus ATCC VR-865    |            | NC_004828 | 4694 nt   | Jun 9 2003  |
| Avian adeno-associated virus strain DA-1    |            | NC_006263 | 4682 nt   | Jun 26 2004 |
| Avian carcinoma virus                       |            | NC_001402 | 2630 nt   | Apr 27 1993 |
| Avian encephalomyelitis virus               |            | NC_003990 | 7055 nt   | Dec 2 1998  |
| Avian endogenous retrovirus EAV-HP          |            | NC_005947 | 4302 nt   | Jun 25 2004 |
| Avian infectious bronchitis virus           |            | NC_001451 | 27608 nt  | Nov 19 2002 |
| Avian leukosis virus - RSA                  |            | NC_001408 | 7286 nt   | Apr 28 1993 |
| Avian metapneumovirus                       |            | NC_007652 | 14071 nt  | Nov 19 2005 |
| Avian myelocytomatosis virus                |            | NC_001866 | 3392 nt   | Jan 21 1998 |
| Avian paramyxovirus 6                       |            | NC_003043 | 16236 nt  | Aug 1 2001  |

|                                              |            |           |         |             |
|----------------------------------------------|------------|-----------|---------|-------------|
| B19 virus                                    |            | NC_000883 | 5594 nt | Aug 2 1999  |
| BK polyomavirus                              |            | NC_001538 | 5153 nt | Aug 3 1993  |
| Baboon polyomavirus 1                        |            | NC_007611 | 5230 nt | Oct 3 2005  |
| Bamboo mosaic virus                          |            | NC_001642 | 6366 nt | Mar 16 1996 |
| Bamboo mosaic virus satellite RNA            |            | NC_003497 | 836 nt  | Oct 15 1994 |
| Banana bunchy top virus                      | DNA 1      | NC_003479 | 1111 nt | Jun 28 1993 |
| Banana bunchy top virus                      | DNA 2      | NC_003475 | 1060 nt | Jun 21 1995 |
| Banana bunchy top virus                      | DNA 3      | NC_003473 | 1075 nt | Jun 21 1995 |
| Banana bunchy top virus                      | DNA 4      | NC_003474 | 1043 nt | Jun 21 1995 |
| Banana bunchy top virus                      | DNA 5      | NC_003477 | 1018 nt | Jun 21 1995 |
| Banana bunchy top virus                      | DNA 6      | NC_003476 | 1089 nt | Jun 21 1995 |
| Banana mild mosaic virus                     |            | NC_002729 | 7352 nt | Apr 2 2001  |
| Banana streak GF virus                       |            | NC_007002 | 7263 nt | May 16 2005 |
| Banana streak Mysore virus                   |            | NC_006955 | 7650 nt | Feb 9 2005  |
| Banana streak OL virus                       |            | NC_003381 | 7389 nt | Jun 2 1998  |
| Banana streak virus strain Acuminata Vietnam |            | NC_007003 | 7801 nt | Oct 11 2004 |
| Banna virus                                  | segment 1  | NC_004211 | 3747 nt | Jun 27 2000 |
| Banna virus                                  | segment 2  | NC_004217 | 3048 nt | Jun 27 2000 |
| Banna virus                                  | segment 3  | NC_004218 | 2400 nt | Jun 27 2000 |
| Banna virus                                  | segment 4  | NC_004219 | 2038 nt | Jun 27 2000 |
| Banna virus                                  | segment 5  | NC_004220 | 1716 nt | Jun 27 2000 |
| Banna virus                                  | segment 6  | NC_004221 | 1671 nt | Jun 27 2000 |
| Banna virus                                  | segment 7  | NC_004204 | 1136 nt | Nov 7 1998  |
| Banna virus                                  | segment 8  | NC_004203 | 1119 nt | Nov 7 1998  |
| Banna virus                                  | segment 9  | NC_004202 | 1101 nt | Nov 7 1998  |
| Banna virus                                  | segment 10 | NC_004201 | 977 nt  | Nov 7 1998  |
| Banna virus                                  | segment 11 | NC_004200 | 867 nt  | Nov 7 1998  |
| Banna virus                                  | segment 12 | NC_004198 | 862 nt  | Nov 6 1998  |
| Barley mild mosaic virus                     | RNA 1      | NC_003483 | 7262 nt | Nov 15 2002 |
| Barley mild mosaic virus                     | RNA 2      | NC_003482 | 3524 nt | Nov 15      |



|                                       |       |           |          |             |
|---------------------------------------|-------|-----------|----------|-------------|
|                                       |       |           |          | 2002        |
| Barley stripe mosaic virus            | RNA 1 | NC_003469 | 3768 nt  | Aug 2 1993  |
| Barley stripe mosaic virus            | RNA 2 | NC_003481 | 3289 nt  | Nov 18 1986 |
| Barley stripe mosaic virus            | RNA 3 | NC_003478 | 3164 nt  | May 18 1995 |
| Barley yellow dwarf virus - GAV       |       | NC_004666 | 5685 nt  | Mar 29 2003 |
| Barley yellow dwarf virus - MAV       |       | NC_003680 | 5273 nt  | Apr 20 2002 |
| Barley yellow dwarf virus - PAV       |       | NC_004750 | 5677 nt  | Apr 29 2003 |
| Barley yellow dwarf virus-PAS         |       | NC_002160 | 5695 nt  | Jan 19 2000 |
| Barley yellow mosaic virus            | RNA 1 | NC_002990 | 7637 nt  | Nov 15 2002 |
| Barley yellow mosaic virus            | RNA 2 | NC_002991 | 3582 nt  | Nov 15 2002 |
| Barmah Forest virus                   |       | NC_001786 | 11488 nt | Apr 8 2003  |
| Beak and feather disease virus        |       | NC_001944 | 1993 nt  | Sep 9 1998  |
| Bean calico mosaic virus              | DNA A | NC_003504 | 2603 nt  | Apr 4 1999  |
| Bean calico mosaic virus              | DNA B | NC_003505 | 2572 nt  | Apr 4 1999  |
| Bean common mosaic necrosis virus     |       | NC_004047 | 9612 nt  | Nov 15 2002 |
| Bean common mosaic virus              |       | NC_003397 | 9992 nt  | Feb 6 2002  |
| Bean dwarf mosaic virus               | DNA A | NC_001931 | 2615 nt  | Apr 28 1993 |
| Bean dwarf mosaic virus               | DNA B | NC_001930 | 2576 nt  | Apr 28 1993 |
| Bean golden mosaic virus              | DNA A | NC_004042 | 2617 nt  | Aug 2 1993  |
| Bean golden mosaic virus              | DNA B | NC_004043 | 2580 nt  | Aug 2 1993  |
| Bean golden yellow mosaic virus       | DNA A | NC_001439 | 2647 nt  | Dec 5 1996  |
| Bean golden yellow mosaic virus       | DNA B | NC_001438 | 2585 nt  | Apr 29 1993 |
| Bean leafroll virus                   |       | NC_003369 | 5964 nt  | Jan 21 2002 |
| Bean pod mottle virus                 | RNA 1 | NC_003496 | 5995 nt  | Nov 15 2002 |
| Bean pod mottle virus                 | RNA 2 | NC_003495 | 3662 nt  | Nov 15 2002 |
| Bean yellow dwarf virus               |       | NC_003493 | 2561 nt  | Jul 28 1997 |
| Bean yellow mosaic virus              |       | NC_003492 | 9532 nt  | Nov 15 2002 |
| Beet black scorch virus               |       | NC_004452 | 3644 nt  | Dec 18 2002 |
| Beet black scorch virus satellite RNA |       | NC_006460 | 615 nt   | Oct 1 2004  |
| Beet chlorosis virus                  |       | NC_002766 | 5776 nt  | May 3 2001  |

|                                           |       |           |          |             |
|-------------------------------------------|-------|-----------|----------|-------------|
| Beet curly top virus                      |       | NC_001412 | 2994 nt  | Sep 5 2003  |
| Beet mild curly top virus                 |       | NC_004753 | 2930 nt  | Apr 28 2003 |
| Beet mild yellowing virus                 |       | NC_003491 | 5722 nt  | Aug 18 1995 |
| Beet mosaic virus                         |       | NC_005304 | 9591 nt  | Dec 20 2003 |
| Beet necrotic yellow vein virus           | RNA 1 | NC_003514 | 6746 nt  | Dec 20 2003 |
| Beet necrotic yellow vein virus           | RNA 2 | NC_003515 | 4609 nt  | Oct 10 2002 |
| Beet necrotic yellow vein virus           | RNA 3 | NC_003516 | 1774 nt  | May 8 1996  |
| Beet necrotic yellow vein virus           | RNA 4 | NC_003517 | 1465 nt  | May 8 1996  |
| Beet necrotic yellow vein virus           | RNA 5 | NC_003513 | 1320 nt  | Sep 2 1995  |
| Beet pseudo-yellowing virus               | RNA 1 | NC_005209 | 8007 nt  | Nov 11 2003 |
| Beet pseudo-yellowing virus               | RNA 2 | NC_005210 | 7904 nt  | Nov 11 2003 |
| Beet ringspot virus                       | RNA 1 | NC_003693 | 7362 nt  | Nov 15 2002 |
| Beet ringspot virus                       | RNA 2 | NC_003694 | 4662 nt  | Nov 15 2002 |
| Beet severe curly top virus               |       | NC_004754 | 2927 nt  | Apr 28 2003 |
| Beet soil-borne mosaic virus              | RNA 1 | NC_003506 | 6683 nt  | Nov 15 2002 |
| Beet soil-borne mosaic virus              | RNA 2 | NC_003503 | 4616 nt  | May 18 1998 |
| Beet soil-borne mosaic virus              | RNA 3 | NC_003507 | 1720 nt  | Aug 2 2000  |
| Beet soil-borne mosaic virus              | RNA 4 | NC_003508 | 1203 nt  | Aug 2 2000  |
| Beet soil-borne virus                     | RNA 1 | NC_003520 | 5834 nt  | Jan 16 1998 |
| Beet soil-borne virus                     | RNA 2 | NC_003518 | 3454 nt  | Feb 14 1997 |
| Beet soil-borne virus                     | RNA 3 | NC_003519 | 3005 nt  | Mar 13 1996 |
| Beet virus Q                              | RNA 1 | NC_003510 | 6003 nt  | Sep 4 1998  |
| Beet virus Q                              | RNA 2 | NC_003511 | 2913 nt  | Sep 4 1998  |
| Beet virus Q                              | RNA 3 | NC_003512 | 2529 nt  | Sep 4 1998  |
| Beet western yellows ST9 associated virus |       | NC_004045 | 2843 nt  | Jun 11 1993 |
| Beet western yellows virus                |       | NC_004756 | 5666 nt  | Apr 30 2003 |
| Beet yellows virus                        |       | NC_001598 | 15480 nt | Nov 15 2002 |
| Begomovirus-associated DNA-II             |       | NC_006956 | 1032 nt  | Mar 2 2005  |
| Begomovirus-associated DNA-III            |       | NC_006957 | 1209 nt  | Mar 2 2005  |
| Beilong virus                             |       | NC_007803 | 19212 nt | Feb 24 2006 |
| Bhendi yellow vein mosaic virus           |       | NC_003418 | 2741 nt  | Apr 13      |

|                                                     |            |           |           |             |
|-----------------------------------------------------|------------|-----------|-----------|-------------|
|                                                     |            |           |           | 2000        |
| Bhendi yellow vein mosaic virus-associated DNA beta |            | NC_003405 | 1353 nt   | Feb 3 2001  |
| Bitter melon leaf curl disease-associated DNA beta  |            | NC_007655 | 1354 nt   | Dec 19 2005 |
| Black beetle virus                                  | RNA 1      | NC_001411 | 3106 nt   | Apr 22 2005 |
| Black beetle virus                                  | RNA 2      | NC_002037 | 1399 nt   | Jun 13 1985 |
| Black queen cell virus                              |            | NC_003784 | 8550 nt   | May 29 2000 |
| Blackberry yellow vein virus                        | RNA1       | NC_006962 | 7801 nt   | Apr 8 2005  |
| Blackberry yellow vein virus                        | RNA2       | NC_006963 | 7917 nt   | Jan 3 2005  |
| Blackcurrant reversion virus                        | RNA 1      | NC_003509 | 7711 nt   | Nov 15 2002 |
| Blackcurrant reversion virus                        | RNA 2      | NC_003502 | 6405 nt   | Jan 5 1999  |
| Blattella germanica densovirus                      |            | NC_005041 | 5335 nt   | Feb 16 2003 |
| Blueberry red ringspot virus                        |            | NC_003138 | 8303 nt   | Oct 11 2001 |
| Blueberry scorch virus                              |            | NC_003499 | 8512 nt   | Nov 15 2002 |
| Bluetongue virus                                    | segment 1  | NC_006023 | 3944 nt   | Jul 13 2004 |
| Bluetongue virus                                    | segment 2  | NC_006013 | 2953 nt   | Jul 13 2004 |
| Bluetongue virus                                    | segment 3  | NC_006014 | 2772 nt   | Jul 13 2004 |
| Bluetongue virus                                    | segment 4  | NC_006024 | 1980 nt   | Jul 13 2004 |
| Bluetongue virus                                    | segment 5  | NC_006025 | 1769 nt   | Jul 13 2004 |
| Bluetongue virus                                    | segment 6  | NC_006010 | 1638 nt   | Jul 13 2004 |
| Bluetongue virus                                    | segment 7  | NC_006022 | 1156 nt   | Jul 13 2004 |
| Bluetongue virus                                    | segment 8  | NC_006007 | 1125 nt   | Jul 13 2004 |
| Bluetongue virus                                    | segment 9  | NC_006008 | 1049 nt   | Jul 13 2004 |
| Bluetongue virus                                    | segment 10 | NC_006015 | 822 nt    | Jul 13 2004 |
| Bombyx mori cypovirus 1 satellite RNA               |            | NC_006630 | 647 nt    | Jan 7 2005  |
| Bombyx mori densovirus 1                            |            | NC_003346 | 5076 nt   | Dec 31 2001 |
| Bombyx mori densovirus 5                            |            | NC_004287 | 5078 nt   | Jan 12 2004 |
| Bombyx mori nucleopolyhedrovirus                    |            | NC_001962 | 128413 nt | Oct 14 1998 |
| Boolarra virus                                      | RNA 1      | NC_004142 | 3096 nt   | Mar 5 2001  |
| Boolarra virus                                      | RNA 2      | NC_004145 | 1305 nt   | Nov 23 1989 |
| Border disease virus 1                              |            | NC_003679 | 12333 nt  | Jan 23 2003 |

|                                        |           |           |                |
|----------------------------------------|-----------|-----------|----------------|
| Borna disease virus                    | NC_001607 | 8910 nt   | Apr 22<br>2004 |
| Botrytis virus F                       | NC_002604 | 6827 nt   | Oct 14<br>2000 |
| Botrytis virus X                       | NC_005132 | 6966 nt   | Oct 1 2003     |
| Bovine adeno-associated virus          | NC_005889 | 4693 nt   | Jun 14<br>2004 |
| Bovine adenovirus A                    | NC_006324 | 34185 nt  | Sep 28<br>2004 |
| Bovine adenovirus B                    | NC_001876 | 34446 nt  | Mar 6<br>1998  |
| Bovine adenovirus D                    | NC_002685 | 31301 nt  | Aug 27<br>2003 |
| Bovine circovirus                      | NC_002068 | 1768 nt   | Dec 17<br>1998 |
| Bovine coronavirus                     | NC_003045 | 31028 nt  | Dec 3<br>2002  |
| Bovine enterovirus                     | NC_001859 | 7414 nt   | Nov 19<br>2002 |
| Bovine ephemeral fever virus           | NC_002526 | 14900 nt  | Sep 6 2000     |
| Bovine foamy virus                     | NC_001831 | 12002 nt  | Sep 3 1997     |
| Bovine herpesvirus 1                   | NC_001847 | 135301 nt | Nov 25<br>1997 |
| Bovine herpesvirus 4                   | NC_002665 | 108873 nt | Feb 14<br>2001 |
| Bovine herpesvirus 5                   | NC_005261 | 138390 nt | Jan 9 2004     |
| Bovine immunodeficiency virus          | NC_001413 | 8482 nt   | Apr 28<br>1993 |
| Bovine kobuvirus                       | NC_004421 | 8374 nt   | Nov 7<br>2003  |
| Bovine leukemia virus                  | NC_001414 | 8419 nt   | Jan 12<br>2004 |
| Bovine papillomavirus - 1              | NC_001522 | 7945 nt   | Jan 28<br>1986 |
| Bovine papillomavirus - 3              | NC_004197 | 7276 nt   | Sep 16<br>2002 |
| Bovine papillomavirus - 7              | NC_007612 | 7412 nt   | Oct 29<br>2005 |
| Bovine papillomavirus type 5           | NC_004195 | 7841 nt   | Sep 16<br>2002 |
| Bovine papular stomatitis virus        | NC_005337 | 134431 nt | Jan 21<br>2004 |
| Bovine parainfluenza virus 3           | NC_002161 | 15456 nt  | Jan 27<br>2000 |
| Bovine parvovirus                      | NC_001540 | 5517 nt   | May 18<br>1995 |
| Bovine parvovirus 2                    | NC_006259 | 5610 nt   | Oct 2 2001     |
| Bovine polyomavirus                    | NC_001442 | 4697 nt   | Apr 29<br>1993 |
| Bovine respiratory syncytial virus     | NC_001989 | 15140 nt  | Dec 17<br>1998 |
| Bovine viral diarrhea virus 1          | NC_001461 | 12573 nt  | Jan 17<br>2003 |
| Bovine viral diarrhea virus genotype 2 | NC_002032 | 12255 nt  | Jan 24<br>2003 |

|                                   |           |           |           |             |
|-----------------------------------|-----------|-----------|-----------|-------------|
| Breda virus                       |           | NC_007447 | 28475 nt  | Sep 6 2005  |
| Broad bean mottle virus           | RNA 1     | NC_004008 | 3158 nt   | Apr 28 1993 |
| Broad bean mottle virus           | RNA 2     | NC_004007 | 2799 nt   | Apr 28 1993 |
| Broad bean mottle virus           | RNA 3     | NC_004006 | 2293 nt   | Apr 28 1993 |
| Broad bean necrosis virus         | RNA 1     | NC_004423 | 5600 nt   | Nov 20 2002 |
| Broad bean necrosis virus         | RNA 2     | NC_004424 | 2831 nt   | Nov 20 2002 |
| Broad bean necrosis virus         | RNA 3     | NC_004425 | 2417 nt   | Nov 20 2002 |
| Broad bean wilt virus 1           | RNA 1     | NC_005289 | 5817 nt   | Dec 17 2003 |
| Broad bean wilt virus 1           | RNA 2     | NC_005290 | 3446 nt   | Dec 17 2003 |
| Broad bean wilt virus 2           | RNA 1     | NC_003003 | 5951 nt   | Nov 15 2002 |
| Broad bean wilt virus 2           | RNA 2     | NC_003004 | 3607 nt   | Nov 15 2002 |
| Brome mosaic virus                | RNA 1     | NC_002026 | 3234 nt   | Jan 28 1986 |
| Brome mosaic virus                | RNA 2     | NC_002027 | 2865 nt   | Jan 28 1986 |
| Brome mosaic virus                | RNA 3     | NC_002028 | 2117 nt   | Jul 13 1983 |
| Brome streak mosaic virus         |           | NC_003501 | 9672 nt   | Nov 15 2002 |
| Budgerigar fledgling polyomavirus |           | NC_004764 | 4981 nt   | May 2 2003  |
| Bunyamwera virus                  | segment L | NC_001925 | 6875 nt   | Jul 30 1991 |
| Bunyamwera virus                  | segment M | NC_001926 | 4458 nt   | Apr 28 1993 |
| Bunyamwera virus                  | segment S | NC_001927 | 961 nt    | Apr 29 1993 |
| Cabbage leaf curl virus           | DNA A     | NC_003866 | 2583 nt   | Nov 1 1996  |
| Cabbage leaf curl virus           | DNA B     | NC_003887 | 2513 nt   | Nov 1 1996  |
| Cacao swollen shoot virus         |           | NC_001574 | 7161 nt   | Aug 4 1993  |
| Cactus virus X                    |           | NC_002815 | 6614 nt   | Jul 2 2001  |
| Calicivirus isolate TCG           |           | NC_006875 | 7453 nt   | Feb 21 2004 |
| Calicivirus strain NB             |           | NC_004064 | 7453 nt   | Jul 1 2002  |
| Callitrichine herpesvirus 3       |           | NC_004367 | 149696 nt | Nov 14 2002 |
| Camelpox virus                    |           | NC_003391 | 205719 nt | Feb 4 2002  |
| Canary circovirus                 |           | NC_003410 | 1952 nt   | Jul 26 2001 |
| Canarypox virus                   |           | NC_005309 | 359853 nt | Jan 3 2004  |
| Canine adenovirus                 |           | NC_001734 | 30536 nt  | Sep 5 1996  |
| Canine calicivirus                |           | NC_004542 | 8513 nt   | Feb 14      |

|                                           |       |           |           |             |
|-------------------------------------------|-------|-----------|-----------|-------------|
|                                           |       |           |           | 2003        |
| Canine distemper virus                    |       | NC_001921 | 15690 nt  | Jul 21 1998 |
| Canine minute virus                       |       | NC_004442 | 5097 nt   | Dec 17 2002 |
| Canine oral papillomavirus                |       | NC_001619 | 8607 nt   | Jun 15 1995 |
| Canine papillomavirus 2                   |       | NC_006564 | 8101 nt   | Sep 18 2004 |
| Canine parvovirus                         |       | NC_001539 | 5323 nt   | Jan 12 2004 |
| Caprine arthritis-encephalitis virus      |       | NC_001463 | 9189 nt   | Aug 2 1993  |
| Cardamine chlorotic fleck virus           |       | NC_001600 | 4041 nt   | Aug 4 1993  |
| Carnation Italian ringspot virus          |       | NC_003500 | 4760 nt   | Mar 28 1995 |
| Carnation etched ring virus               |       | NC_003498 | 7932 nt   | Jun 23 1988 |
| Carnation mottle virus                    |       | NC_001265 | 4003 nt   | Apr 22 2004 |
| Carnation ringspot virus                  | RNA 1 | NC_003530 | 3840 nt   | Jul 26 1993 |
| Carnation ringspot virus                  | RNA 2 | NC_003531 | 1403 nt   | Apr 5 1991  |
| Carrot mottle mimic virus                 |       | NC_001726 | 4201 nt   | Jun 12 1996 |
| Carrot red leaf luteovirus associated RNA |       | NC_003871 | 2835 nt   | Nov 2 1997  |
| Carrot red leaf virus                     |       | NC_006265 | 5723 nt   | Aug 28 2004 |
| Casphalia extranea densovirus             |       | NC_004288 | 5002 nt   | Jan 1 2002  |
| Cassava common mosaic virus               |       | NC_001658 | 6376 nt   | Apr 15 1995 |
| Cassava vein mosaic virus                 |       | NC_001648 | 8159 nt   | Jul 2 1996  |
| Cassia yellow blotch virus                | RNA 1 | NC_006999 | 3178 nt   | May 12 2005 |
| Cassia yellow blotch virus                | RNA 2 | NC_007000 | 2720 nt   | May 12 2005 |
| Cassia yellow blotch virus                | RNA 3 | NC_007001 | 2091 nt   | May 12 2005 |
| Cauliflower mosaic virus                  |       | NC_001497 | 8024 nt   | Nov 3 1982  |
| Cell fusing agent virus                   |       | NC_001564 | 10695 nt  | Jan 14 2003 |
| Cercopithecine herpesvirus 1              |       | NC_004812 | 156789 nt | May 22 2003 |
| Cercopithecine herpesvirus 15             |       | NC_006146 | 171096 nt | Aug 24 2004 |
| Cercopithecine herpesvirus 16             |       | NC_007653 | 156487 nt | Dec 8 2005  |
| Cercopithecine herpesvirus 17             |       | NC_003401 | 133719 nt | Mar 24 1999 |
| Cercopithecine herpesvirus 2              |       | NC_006560 | 150715 nt | Oct 4 2004  |
| Cercopithecine herpesvirus 7              |       | NC_002686 | 124138 nt | Oct 28 2000 |

|                                                     |           |           |           |                |
|-----------------------------------------------------|-----------|-----------|-----------|----------------|
| Cercopithecine herpesvirus 8                        |           | NC_006150 | 221454 nt | Aug 26<br>2004 |
| Cereal yellow dwarf virus-RPS                       |           | NC_002198 | 5662 nt   | Apr 12<br>2000 |
| Cereal yellow dwarf virus-RPV                       |           | NC_004751 | 5723 nt   | Apr 28<br>2003 |
| Cereal yellow dwarf virus-RPV satellite RNA         |           | NC_003533 | 322 nt    | Aug 2<br>1993  |
| Cestrum yellow leaf curling virus                   |           | NC_004324 | 8253 nt   | Jul 7 2003     |
| Chaetoceros salsugineum nuclear inclusion virus     |           | NC_007193 | 6000 nt   | Feb 4 2006     |
| Channa lucius virus                                 | segment A | NC_005982 | 3429 nt   | Jul 10<br>2004 |
| Channa lucius virus                                 | segment B | NC_005983 | 2750 nt   | Jul 12<br>2004 |
| Chayote mosaic virus                                |           | NC_002588 | 6364 nt   | Nov 21<br>1999 |
| Chayote yellow mosaic virus                         |           | NC_004618 | 2787 nt   | Jan 5 1998     |
| Cherry chlorotic rusty spot associated partitivirus | RNA 1     | NC_006442 | 2021 nt   | Sep 10<br>2004 |
| Cherry chlorotic rusty spot associated partitivirus | RNA 2     | NC_006443 | 1841 nt   | Sep 10<br>2004 |
| Cherry green ring mottle virus                      |           | NC_001946 | 8372 nt   | Sep 14<br>1998 |
| Cherry mottle leaf virus                            |           | NC_002500 | 8018 nt   | Jul 20<br>2000 |
| Cherry necrotic rusty mottle virus                  |           | NC_002468 | 8432 nt   | Jun 22<br>2000 |
| Cherry rasp leaf virus                              | RNA1      | NC_006271 | 7034 nt   | Sep 15<br>2004 |
| Cherry rasp leaf virus                              | RNA2      | NC_006272 | 3315 nt   | Sep 15<br>2004 |
| Cherry virus A                                      |           | NC_003689 | 7383 nt   | Oct 3 1995     |
| Chicken anemia virus                                |           | NC_001427 | 2319 nt   | Aug 2<br>1993  |
| Chicken astrovirus                                  |           | NC_003790 | 6927 nt   | Mar 22<br>2000 |
| Chicory yellow mottle virus large satellite RNA     |           | NC_003778 | 1165 nt   | Apr 29<br>1993 |
| Chicory yellow mottle virus satellite RNA           |           | NC_003971 | 457 nt    | Apr 29<br>1993 |
| Chicory yellow mottle virus satellite RNA L1        |           | NC_006452 | 1145 nt   | Apr 29<br>1993 |
| Chicory yellow mottle virus small satellite RNA     |           | NC_006453 | 457 nt    | Apr 29<br>1993 |
| Chikungunya virus                                   |           | NC_004162 | 11826 nt  | Sep 6 2002     |
| Chilli leaf curl disease associated sequence        |           | NC_005048 | 1387 nt   | Jul 29<br>2003 |
| Chilli leaf curl virus                              |           | NC_004628 | 2754 nt   | Mar 21<br>2003 |
| Chilli veinal mottle virus                          |           | NC_005778 | 9711 nt   | Mar 4<br>2004  |
| Chimpanzee cytomegalovirus                          |           | NC_003521 | 241087 nt | Apr 2<br>2002  |
| Chinese wheat mosaic virus                          | RNA 1     | NC_002359 | 7147 nt   | May 3<br>1999  |

|                                                         |           |           |           |                |
|---------------------------------------------------------|-----------|-----------|-----------|----------------|
| Chinese wheat mosaic virus                              | RNA 2     | NC_002356 | 3569 nt   | May 3<br>1999  |
| Chino del tomate virus                                  | DNA A     | NC_003830 | 2634 nt   | Feb 23<br>1999 |
| Chino del tomate virus                                  | DNA B     | NC_003831 | 2579 nt   | Feb 23<br>1999 |
| Chloris striate mosaic virus                            |           | NC_001466 | 2750 nt   | Aug 29<br>2003 |
| Choristoneura fumiferana MNPV                           |           | NC_004778 | 129593 nt | May 1<br>2003  |
| Choristoneura fumiferana defective nucleopolyhedrovirus |           | NC_005137 | 131160 nt | Oct 11<br>2003 |
| Chrysodeixis chalcites nucleopolyhedrovirus             |           | NC_007151 | 149622 nt | Jun 29<br>2005 |
| Chum salmon reovirus CS                                 | 10        | NC_007590 | 985 nt    | Nov 14<br>2001 |
| Citrus leaf blotch virus                                |           | NC_003877 | 8747 nt   | May 25<br>2001 |
| Citrus leaf rugose virus                                | RNA 1     | NC_003548 | 3404 nt   | Aug 2<br>1995  |
| Citrus leaf rugose virus                                | RNA 2     | NC_003547 | 2990 nt   | Dec 7<br>1994  |
| Citrus leaf rugose virus                                | RNA 3     | NC_003546 | 2289 nt   | Apr 5<br>1995  |
| Citrus psorosis virus                                   | RNA1      | NC_006314 | 8186 nt   | Jul 18<br>2004 |
| Citrus psorosis virus                                   | RNA2      | NC_006315 | 1645 nt   | Jul 18<br>2004 |
| Citrus psorosis virus                                   | RNA3      | NC_006316 | 1447 nt   | Jul 18<br>2004 |
| Citrus sudden death-associated virus                    |           | NC_006950 | 6820 nt   | Apr 7<br>2005  |
| Citrus tristeza virus                                   |           | NC_001661 | 19296 nt  | Dec 9<br>2002  |
| Citrus yellow mosaic virus                              |           | NC_003382 | 7559 nt   | Oct 25<br>2001 |
| Classical swine fever virus                             |           | NC_002657 | 12301 nt  | Jan 24<br>2003 |
| Clover yellow mosaic virus                              |           | NC_001753 | 7015 nt   | Mar 1<br>2001  |
| Clover yellow vein virus                                |           | NC_003536 | 9584 nt   | Nov 15<br>2002 |
| Cocksfoot mottle virus                                  |           | NC_002618 | 4082 nt   | Nov 19<br>2003 |
| Cocksfoot streak virus                                  |           | NC_003742 | 9663 nt   | Nov 15<br>2002 |
| Coconut foliar decay virus                              |           | NC_001465 | 1291 nt   | Aug 2<br>1993  |
| Colorado tick fever virus                               | segment 1 | NC_004181 | 4350 nt   | Nov 25<br>2000 |
| Colorado tick fever virus                               | segment 2 | NC_004182 | 3909 nt   | Aug 16<br>2000 |
| Colorado tick fever virus                               | segment 3 | NC_004183 | 3586 nt   | Aug 16<br>2000 |
| Colorado tick fever virus                               | segment 4 | NC_004184 | 3157 nt   | Aug 16<br>2000 |
| Colorado tick fever virus                               | segment 5 | NC_004185 | 2432 nt   | Aug 16         |



|                                          |            |           |          |             |
|------------------------------------------|------------|-----------|----------|-------------|
|                                          |            |           |          | 2000        |
| Colorado tick fever virus                | segment 6  | NC_004186 | 2141 nt  | Aug 16 2000 |
| Colorado tick fever virus                | segment 7  | NC_004187 | 2133 nt  | Aug 16 2000 |
| Colorado tick fever virus                | segment 8  | NC_004188 | 2029 nt  | Aug 16 2000 |
| Colorado tick fever virus                | segment 9  | NC_004180 | 1884 nt  | Dec 4 1997  |
| Colorado tick fever virus                | segment 10 | NC_004189 | 1880 nt  | Aug 16 2000 |
| Colorado tick fever virus                | segment 11 | NC_004191 | 998 nt   | Oct 29 1996 |
| Colorado tick fever virus                | segment 12 | NC_004190 | 675 nt   | Apr 25 1996 |
| Columbid circovirus                      |            | NC_002361 | 2037 nt  | Jun 5 2000  |
| Commelina yellow mottle virus            |            | NC_001343 | 7489 nt  | Oct 5 1990  |
| Common chimpanzee papillomavirus 1       |            | NC_001838 | 7889 nt  | Oct 1 1997  |
| Coniothyrium minitans mycovirus          |            | NC_007523 | 4975 nt  | Jan 1 2003  |
| Corchorus yellow vein virus - [Hoa Binh] | DNA A      | NC_006358 | 2724 nt  | Sep 21 2004 |
| Corchorus yellow vein virus - [Hoa Binh] | DNA B      | NC_006359 | 2691 nt  | Sep 21 2004 |
| Cotesia congregata virus                 | Circle1    | NC_006633 | 27346 nt | Jan 13 2005 |
| Cotesia congregata virus                 | Circle10   | NC_006642 | 14286 nt | Jan 13 2005 |
| Cotesia congregata virus                 | Circle11   | NC_006643 | 12903 nt | Jan 13 2005 |
| Cotesia congregata virus                 | Circle12   | NC_006644 | 16103 nt | Jan 13 2005 |
| Cotesia congregata virus                 | Circle13   | NC_006645 | 21388 nt | Jan 13 2005 |
| Cotesia congregata virus                 | Circle14   | NC_006646 | 31972 nt | Jan 13 2005 |
| Cotesia congregata virus                 | Circle15   | NC_006647 | 8785 nt  | Jan 13 2005 |
| Cotesia congregata virus                 | Circle17   | NC_006648 | 15158 nt | Jan 13 2005 |
| Cotesia congregata virus                 | Circle18   | NC_006649 | 32108 nt | Jan 13 2005 |
| Cotesia congregata virus                 | Circle19   | NC_006650 | 18768 nt | Jan 13 2005 |
| Cotesia congregata virus                 | Circle2    | NC_006634 | 14975 nt | Jan 13 2005 |
| Cotesia congregata virus                 | Circle20   | NC_006651 | 19161 nt | Jan 13 2005 |
| Cotesia congregata virus                 | Circle21   | NC_006652 | 4981 nt  | Oct 12 2004 |
| Cotesia congregata virus                 | Circle22   | NC_006653 | 26062 nt | Jan 13 2005 |
| Cotesia congregata virus                 | Circle23   | NC_006654 | 13597 nt | Jan 13 2005 |
| Cotesia congregata virus                 | Circle25   | NC_006655 | 15279 nt | Jan 13 2005 |

|                                                      |          |           |          |             |
|------------------------------------------------------|----------|-----------|----------|-------------|
| Cotesia congregata virus                             | Circle26 | NC_006656 | 12682 nt | Jan 13 2005 |
| Cotesia congregata virus                             | Circle3  | NC_006635 | 29874 nt | Jan 13 2005 |
| Cotesia congregata virus                             | Circle30 | NC_006657 | 19820 nt | Jan 13 2005 |
| Cotesia congregata virus                             | Circle31 | NC_006658 | 30655 nt | Jan 13 2005 |
| Cotesia congregata virus                             | Circle32 | NC_006659 | 41573 nt | Jan 13 2005 |
| Cotesia congregata virus                             | Circle33 | NC_006660 | 20197 nt | Jan 13 2005 |
| Cotesia congregata virus                             | Circle35 | NC_006661 | 11186 nt | Jan 13 2005 |
| Cotesia congregata virus                             | Circle36 | NC_006662 | 17477 nt | Jan 13 2005 |
| Cotesia congregata virus                             | Circle4  | NC_006636 | 15876 nt | Jan 13 2005 |
| Cotesia congregata virus                             | Circle5  | NC_006637 | 14489 nt | Jan 13 2005 |
| Cotesia congregata virus                             | Circle6  | NC_006638 | 15230 nt | Jan 13 2005 |
| Cotesia congregata virus                             | Circle7  | NC_006639 | 24748 nt | Jan 13 2005 |
| Cotesia congregata virus                             | Circle8  | NC_006640 | 5032 nt  | Jan 13 2005 |
| Cotesia congregata virus                             | Circle9  | NC_006641 | 15959 nt | Jan 13 2005 |
| Cotton leaf crumple geminivirus                      | DNA A    | NC_004580 | 2630 nt  | Mar 6 2003  |
| Cotton leaf crumple geminivirus                      | DNA B    | NC_004581 | 2550 nt  | Mar 6 2003  |
| Cotton leaf curl Alabad virus                        |          | NC_004582 | 2744 nt  | Mar 6 2003  |
| Cotton leaf curl Bangalore virus                     |          | NC_007290 | 2751 nt  | Aug 5 2005  |
| Cotton leaf curl Bangalore virus-associated DNA beta |          | NC_007219 | 1355 nt  | Aug 2 2005  |
| Cotton leaf curl Gezira virus                        |          | NC_002510 | 2764 nt  | Aug 4 2000  |
| Cotton leaf curl Gezira virus-associated DNA beta    |          | NC_006935 | 1348 nt  | Apr 7 2005  |
| Cotton leaf curl Kokhran virus                       |          | NC_004583 | 2748 nt  | Mar 6 2003  |
| Cotton leaf curl Multan virus                        |          | NC_004607 | 2751 nt  | Mar 11 2003 |
| Cotton leaf curl Multan virus satellite U36-1        |          | NC_007721 | 1350 nt  | Jan 7 2006  |
| Cotton leaf curl Rajasthan virus                     |          | NC_003199 | 2754 nt  | Jun 20 2001 |
| Cotton leaf curl virus-associated DNA beta           |          | NC_003200 | 1351 nt  | Jul 6 2001  |
| Cottontail rabbit papillomavirus                     |          | NC_001541 | 7868 nt  | Mar 2 2001  |
| Cowpea aphid-borne mosaic virus                      |          | NC_004013 | 9465 nt  | Nov 15 2002 |
| Cowpea chlorotic mottle virus                        | RNA 1    | NC_003543 | 3171 nt  | Aug 2 1993  |

|                                             |       |           |           |             |
|---------------------------------------------|-------|-----------|-----------|-------------|
| Cowpea chlorotic mottle virus               | RNA 2 | NC_003541 | 2774 nt   | Aug 2 1993  |
| Cowpea chlorotic mottle virus               | RNA 3 | NC_003542 | 2173 nt   | Aug 2 1993  |
| Cowpea mosaic virus                         | RNA 1 | NC_003549 | 5889 nt   | Nov 15 2002 |
| Cowpea mosaic virus                         | RNA 2 | NC_003550 | 3481 nt   | Nov 15 2002 |
| Cowpea mottle virus                         |       | NC_003535 | 4029 nt   | Apr 10 2002 |
| Cowpea severe leaf curl-associated DNA beta |       | NC_006952 | 1379 nt   | Feb 22 2005 |
| Cowpea severe mosaic virus                  | RNA 1 | NC_003545 | 5957 nt   | Nov 15 2002 |
| Cowpea severe mosaic virus                  | RNA 2 | NC_003544 | 3732 nt   | Nov 15 2002 |
| Cowpox virus                                |       | NC_003663 | 224499 nt | May 19 2003 |
| Cricket paralysis virus                     |       | NC_003924 | 9185 nt   | Jul 2 2000  |
| Crimean-Congo hemorrhagic fever virus       | L     | NC_005301 | 12108 nt  | Sep 27 2005 |
| Crimean-Congo hemorrhagic fever virus       | M     | NC_005300 | 5366 nt   | Dec 13 2003 |
| Crimean-Congo hemorrhagic fever virus       | S     | NC_005302 | 1672 nt   | Dec 13 2003 |
| Croton yellow vein mosaic virus             |       | NC_004300 | 2757 nt   | Sep 18 2002 |
| Crow polyomavirus                           |       | NC_007922 | 5079 nt   | Mar 19 2006 |
| Crucifer tobamovirus                        |       | NC_003355 | 6298 nt   | Jan 5 2002  |
| Cryphonectria hypovirus 1                   |       | NC_001492 | 12734 nt  | Aug 2 1993  |
| Cryphonectria hypovirus 2                   |       | NC_003534 | 12507 nt  | Jul 14 1994 |
| Cryphonectria hypovirus 3                   |       | NC_000960 | 9799 nt   | Nov 29 1999 |
| Cryphonectria hypovirus 4                   |       | NC_006431 | 9149 nt   | Oct 31 2003 |
| Cryphonectria parasitica mitovirus 1-NB631  |       | NC_004046 | 2728 nt   | Jan 27 1995 |
| Cryptophlebia leucotreta granulovirus       |       | NC_005068 | 110907 nt | Aug 7 2002  |
| Cucumber Bulgarian virus                    |       | NC_004725 | 4576 nt   | Apr 17 2003 |
| Cucumber fruit mottle mosaic virus          |       | NC_002633 | 6562 nt   | Dec 28 2000 |
| Cucumber green mottle mosaic virus          |       | NC_001801 | 6424 nt   | Apr 29 1993 |
| Cucumber leaf spot virus                    |       | NC_007816 | 4433 nt   | Mar 1 2006  |
| Cucumber mosaic virus                       | RNA 1 | NC_002034 | 3357 nt   | Apr 29 1993 |
| Cucumber mosaic virus                       | RNA 2 | NC_002035 | 3050 nt   | Apr 15 2002 |
| Cucumber mosaic virus                       | RNA 3 | NC_001440 | 2216 nt   | Apr 29 1993 |

|                                                 |        |           |           |             |
|-------------------------------------------------|--------|-----------|-----------|-------------|
| Cucumber mosaic virus satellite RNA             |        | NC_002602 | 336 nt    | Aug 2 1993  |
| Cucumber necrosis virus                         |        | NC_001469 | 4701 nt   | Aug 2 1993  |
| Cucumber vein yellowing virus                   |        | NC_006941 | 9751 nt   | Mar 17 2005 |
| Cucumber yellows virus                          | RNA 1  | NC_004716 | 7899 nt   | Apr 11 2003 |
| Cucumber yellows virus                          | RNA 2  | NC_004717 | 7607 nt   | Apr 15 2003 |
| Cucurbit aphid-borne yellows virus              |        | NC_003688 | 5669 nt   | Jan 13 1994 |
| Cucurbit leaf curl virus                        | DNA A  | NC_002984 | 2632 nt   | Oct 25 2000 |
| Cucurbit leaf curl virus                        | DNA B  | NC_002985 | 2600 nt   | Feb 9 2000  |
| Cucurbit yellow stunting disorder virus         | RNA 1  | NC_004809 | 9123 nt   | May 19 2003 |
| Cucurbit yellow stunting disorder virus         | RNA 2  | NC_004810 | 7976 nt   | May 17 2003 |
| Cucurbita yellow vein virus-associated DNA beta |        | NC_005875 | 667 nt    | May 10 2004 |
| Culex nigripalpus baculovirus                   |        | NC_003084 | 108252 nt | Aug 22 2001 |
| Cycas necrotic stunt virus                      | RNA 1  | NC_003791 | 7471 nt   | Nov 15 2002 |
| Cycas necrotic stunt virus                      | RNA 2  | NC_003792 | 4669 nt   | Nov 15 2002 |
| Cydia pomonella granulovirus                    |        | NC_002816 | 123500 nt | Apr 2 2001  |
| Cymbidium mosaic virus                          |        | NC_001812 | 6227 nt   | May 19 1997 |
| Cymbidium ringspot virus                        |        | NC_003532 | 4733 nt   | Nov 23 1989 |
| Cymbidium ringspot virus satellite RNA          |        | NC_004009 | 619 nt    | Apr 29 1993 |
| Cypovirus 1                                     | RNA 1  | NC_003016 | 4164 nt   | Jul 17 2001 |
| Cypovirus 1                                     | RNA 2  | NC_003017 | 3853 nt   | Jul 17 2001 |
| Cypovirus 1                                     | RNA 3  | NC_003018 | 3846 nt   | Jul 17 2001 |
| Cypovirus 1                                     | RNA 4  | NC_003019 | 3262 nt   | Jul 17 2001 |
| Cypovirus 1                                     | RNA 5  | NC_003020 | 2851 nt   | Jul 17 2001 |
| Cypovirus 1                                     | RNA 6  | NC_003021 | 1792 nt   | Jul 17 2001 |
| Cypovirus 1                                     | RNA 7  | NC_003022 | 1501 nt   | Jul 17 2001 |
| Cypovirus 1                                     | RNA 8  | NC_003023 | 1332 nt   | Jul 17 2001 |
| Cypovirus 1                                     | RNA 9  | NC_003024 | 1187 nt   | Jul 17 2001 |
| Cypovirus 1                                     | RNA 10 | NC_003025 | 944 nt    | Jul 17 2001 |
| Cypovirus 14                                    | RNA 1  | NC_003006 | 4329 nt   | Jul 16 2001 |

|                                  |           |           |          |             |
|----------------------------------|-----------|-----------|----------|-------------|
| Cypovirus 14                     | RNA 2     | NC_003007 | 4056 nt  | Jul 16 2001 |
| Cypovirus 14                     | RNA 3     | NC_003008 | 3921 nt  | Jul 16 2001 |
| Cypovirus 14                     | RNA 4     | NC_003009 | 3339 nt  | Jul 16 2001 |
| Cypovirus 14                     | RNA 5     | NC_003010 | 3159 nt  | Jul 16 2001 |
| Cypovirus 14                     | RNA 6     | NC_003011 | 1783 nt  | Jul 16 2001 |
| Cypovirus 14                     | RNA 7     | NC_003012 | 1391 nt  | Jul 16 2001 |
| Cypovirus 14                     | RNA 8     | NC_003013 | 1250 nt  | Jul 16 2001 |
| Cypovirus 14                     | RNA 9     | NC_003014 | 1141 nt  | Jul 16 2001 |
| Cypovirus 14                     | RNA 10    | NC_003015 | 956 nt   | Jul 16 2001 |
| Dasheen mosaic virus             |           | NC_003537 | 10038 nt | Nov 15 2002 |
| Deer papillomavirus              |           | NC_001523 | 8374 nt  | Mar 8 2002  |
| Deformed wing virus              |           | NC_004830 | 10140 nt | Dec 15 2002 |
| Dendrolimus punctatus densovirus |           | NC_006555 | 5039 nt  | Sep 8 2004  |
| Dendrolimus punctatus tetravirus | RNA1      | NC_005898 | 5492 nt  | May 22 2004 |
| Dendrolimus punctatus tetravirus | RNA2      | NC_005899 | 2490 nt  | May 22 2004 |
| Dengue virus type 1              |           | NC_001477 | 10735 nt | Nov 15 2002 |
| Dengue virus type 2              |           | NC_001474 | 10703 nt | Nov 18 2002 |
| Dengue virus type 3              |           | NC_001475 | 10696 nt | Aug 2 1993  |
| Dengue virus type 4              |           | NC_002640 | 10649 nt | Aug 22 2005 |
| Diaporthe ambigua RNA virus 1    |           | NC_001278 | 4113 nt  | Jan 4 2000  |
| Diatraea saccharalis densovirus  |           | NC_001899 | 5941 nt  | Jun 2 1998  |
| Dicliptera yellow mottle virus   | DNA A     | NC_003856 | 2607 nt  | Jan 1 2000  |
| Dicliptera yellow mottle virus   | DNA B     | NC_003857 | 2597 nt  | Jan 12 2000 |
| Digitaria streak virus           |           | NC_001478 | 2701 nt  | Aug 2 1993  |
| Discula destructiva virus 1      | RNA 1     | NC_002797 | 1787 nt  | Jan 28 2001 |
| Discula destructiva virus 1      | RNA 2     | NC_002800 | 1585 nt  | Feb 27 2001 |
| Discula destructiva virus 1      | RNA 3     | NC_002801 | 1181 nt  | Jan 28 2001 |
| Discula destructiva virus 1      | RNA 4     | NC_002802 | 308 nt   | Jan 28 2001 |
| Discula destructiva virus 2      | segment 1 | NC_003710 | 1781 nt  | Jun 10 2001 |
| Discula destructiva virus 2      | segment 2 | NC_003711 | 1611 nt  | Jun 10 2001 |

|                                            |           |           |           |             |
|--------------------------------------------|-----------|-----------|-----------|-------------|
| Dobrava-Belgrade virus                     | segment L | NC_005235 | 6532 nt   | Nov 25 2003 |
| Dobrava-Belgrade virus                     | segment M | NC_005234 | 3635 nt   | Nov 25 2003 |
| Dobrava-Belgrade virus                     | segment S | NC_005233 | 1673 nt   | Nov 25 2003 |
| Dolphin morbillivirus                      |           | NC_005283 | 15702 nt  | Nov 21 2003 |
| Drosophila C virus                         |           | NC_001834 | 9264 nt   | Sep 10 1997 |
| Drosophila x virus                         | segment A | NC_004177 | 3360 nt   | Sep 16 1996 |
| Drosophila x virus                         | segment B | NC_004169 | 3243 nt   | Oct 11 2001 |
| Duck adenovirus A                          |           | NC_001813 | 33213 nt  | May 31 1997 |
| Duck circovirus                            |           | NC_007220 | 1991 nt   | Jul 17 2005 |
| Duck hepatitis B virus                     |           | NC_001344 | 3027 nt   | Nov 19 1992 |
| Duck picornavirus TW90A                    |           | NC_006553 | 8289 nt   | Sep 1 2004  |
| Dugbe virus                                | segment L | NC_004159 | 12255 nt  | Mar 31 1995 |
| Dugbe virus                                | segment M | NC_004158 | 4888 nt   | Jan 12 2004 |
| Dugbe virus                                | segment S | NC_004157 | 1716 nt   | Feb 2 2002  |
| Dulcamara mottle virus                     |           | NC_007609 | 6181 nt   | Nov 1 2005  |
| East African cassava mosaic Cameroon virus | DNA A     | NC_004625 | 2802 nt   | Mar 20 2003 |
| East African cassava mosaic Cameroon virus | DNA B     | NC_004630 | 2741 nt   | Mar 21 2003 |
| East African cassava mosaic Zanzibar virus | DNA A     | NC_004655 | 2785 nt   | Mar 28 2003 |
| East African cassava mosaic Zanzibar virus | DNA B     | NC_004656 | 2763 nt   | Mar 28 2003 |
| East African cassava mosaic virus          | DNA A     | NC_004674 | 2799 nt   | Apr 3 2003  |
| East African cassava mosaic virus          | DNA B     | NC_004676 | 2777 nt   | Apr 5 2003  |
| East Asian Passiflora virus                |           | NC_007728 | 10046 nt  | Jan 20 2006 |
| Eastern equine encephalitis virus          |           | NC_003899 | 11675 nt  | Nov 19 2002 |
| Ectocarpus siliculosus virus               |           | NC_002687 | 335593 nt | Feb 27 2001 |
| Ectromelia virus                           |           | NC_004105 | 209771 nt | May 31 1997 |
| Ectropis obliqua picorna-like virus        |           | NC_005092 | 9394 nt   | Sep 13 2003 |
| Eggplant mosaic virus                      |           | NC_001480 | 6331 nt   | Aug 2 1993  |
| Eimeria brunetti RNA virus 1               |           | NC_002701 | 5358 nt   | Mar 25 2001 |
| Elm mottle virus                           | RNA 1     | NC_003569 | 3431 nt   | Oct 2 1996  |
| Elm mottle virus                           | RNA 2     | NC_003568 | 2874 nt   | Nov 2       |

|                                                  |           |           |           |                    |
|--------------------------------------------------|-----------|-----------|-----------|--------------------|
| Elm mottle virus                                 | RNA 3     | NC_003570 | 2315 nt   | 1995<br>Jun 3 1997 |
| Emiliana huxleyi virus 86                        |           | NC_007346 | 407339 nt | Aug 10<br>2005     |
| Encephalomyocarditis virus                       |           | NC_001479 | 7835 nt   | Nov 19<br>2002     |
| Enzootic nasal tumour virus of goats             |           | NC_004994 | 7448 nt   | Jul 8 2003         |
| Epinephelus tauvina nervous necrosis virus       | RNA 1     | NC_004137 | 3103 nt   | Mar 21<br>2001     |
| Epinephelus tauvina nervous necrosis virus       | RNA 2     | NC_004136 | 1433 nt   | Mar 21<br>2001     |
| Epiphyas postvittana nucleopolyhedrovirus        |           | NC_003083 | 118584 nt | Aug 19<br>2001     |
| Equid herpesvirus 1                              |           | NC_001491 | 150224 nt | Jul 15<br>2004     |
| Equid herpesvirus 2                              |           | NC_001650 | 184427 nt | Mar 7<br>1995      |
| Equid herpesvirus 4                              |           | NC_001844 | 145597 nt | Nov 12<br>1997     |
| Equine arteritis virus                           |           | NC_002532 | 12704 nt  | Jul 16<br>1991     |
| Equine foamy virus                               |           | NC_002201 | 12035 nt  | Apr 20<br>2000     |
| Equine infectious anemia virus                   |           | NC_001450 | 8359 nt   | Jan 21<br>1998     |
| Equine rhinitis A virus                          |           | NC_003982 | 7734 nt   | Nov 19<br>2002     |
| Equine rhinitis B virus 1                        |           | NC_003983 | 8828 nt   | Apr 12<br>1996     |
| Equine rhinovirus 3                              |           | NC_003077 | 8821 nt   | Nov 19<br>2002     |
| Equinus papillomavirus                           |           | NC_004194 | 7613 nt   | Sep 16<br>2002     |
| Equus caballus papillomavirus type 1             |           | NC_003748 | 7610 nt   | Apr 28<br>2002     |
| Erethizon dorsatum papillomavirus type 1         |           | NC_006951 | 7428 nt   | Apr 7<br>2005      |
| Erysimum latent virus                            |           | NC_001977 | 6035 nt   | Nov 19<br>1998     |
| Eupatorium yellow vein virus                     |           | NC_003556 | 2766 nt   | Aug 1<br>2000      |
| Eupatorium yellow vein virus-associated DNA beta |           | NC_004515 | 1356 nt   | Jan 10<br>2003     |
| Euphorbia leaf curl virus                        |           | NC_005319 | 2746 nt   | Jan 13<br>2004     |
| Euprosterina elaeasa virus                       |           | NC_003412 | 5698 nt   | Oct 29<br>2003     |
| European brown hare syndrome virus               |           | NC_002615 | 7442 nt   | Feb 14<br>2003     |
| European elk papillomavirus                      |           | NC_001524 | 8095 nt   | May 9<br>1994      |
| Eyach virus                                      | segment 1 | NC_003696 | 4349 nt   | Apr 23<br>2002     |
| Eyach virus                                      | segment 2 | NC_003697 | 3934 nt   | Apr 23<br>2002     |
| Eyach virus                                      | segment 3 | NC_003698 | 3585 nt   | Apr 23             |

|                                  |            |           |          |             |
|----------------------------------|------------|-----------|----------|-------------|
|                                  |            |           |          | 2002        |
| Eyach virus                      | segment 4  | NC_003699 | 3156 nt  | Apr 23 2002 |
| Eyach virus                      | segment 5  | NC_003700 | 2398 nt  | Apr 23 2002 |
| Eyach virus                      | segment 6  | NC_003701 | 2178 nt  | Apr 23 2002 |
| Eyach virus                      | segment 7  | NC_003702 | 2139 nt  | Apr 23 2002 |
| Eyach virus                      | segment 8  | NC_003703 | 2028 nt  | Apr 23 2002 |
| Eyach virus                      | segment 9  | NC_003704 | 1884 nt  | Apr 23 2002 |
| Eyach virus                      | segment 10 | NC_003705 | 1879 nt  | Apr 23 2002 |
| Eyach virus                      | segment 11 | NC_003706 | 1002 nt  | Apr 23 2002 |
| Eyach virus                      | segment 12 | NC_003707 | 678 nt   | Apr 23 2002 |
| Faba bean necrotic yellows virus | DNA 1      | NC_003558 | 1004 nt  | Sep 4 1998  |
| Faba bean necrotic yellows virus | DNA 2      | NC_003560 | 1003 nt  | Jun 2 1999  |
| Faba bean necrotic yellows virus | DNA 3      | NC_003561 | 996 nt   | Jun 2 1999  |
| Faba bean necrotic yellows virus | DNA 4      | NC_003562 | 992 nt   | Jun 2 1999  |
| Faba bean necrotic yellows virus | DNA 5      | NC_003563 | 1006 nt  | Jun 2 1999  |
| Faba bean necrotic yellows virus | DNA 6      | NC_003564 | 1020 nt  | Jun 2 1999  |
| Faba bean necrotic yellows virus | DNA 7      | NC_003565 | 1015 nt  | Jun 2 1999  |
| Faba bean necrotic yellows virus | DNA 8      | NC_003566 | 986 nt   | Jun 2 1999  |
| Faba bean necrotic yellows virus | DNA 9      | NC_003567 | 1007 nt  | Jun 2 1999  |
| Faba bean necrotic yellows virus | DNA 10     | NC_003559 | 999 nt   | Jun 2 1999  |
| Feline calicivirus               |            | NC_001481 | 7683 nt  | Feb 6 2003  |
| Feline coronavirus               |            | NC_007025 | 29147 nt | May 14 2005 |
| Feline foamy virus               |            | NC_001871 | 10479 nt | May 6 1998  |
| Feline immunodeficiency virus    |            | NC_001482 | 9474 nt  | Aug 2 1993  |
| Feline leukemia virus            |            | NC_001940 | 8448 nt  | Aug 15 1998 |
| Feline papillomavirus            |            | NC_004765 | 8300 nt  | May 2 2003  |
| Fer-de-lance virus               |            | NC_005084 | 15378 nt | Sep 5 2003  |
| Figwort mosaic virus             |            | NC_003554 | 7743 nt  | Aug 19 1988 |
| Fiji disease virus               | 1          | NC_007159 | 4532 nt  | May 1 2002  |
| Fiji disease virus               | 10         | NC_007162 | 1819 nt  | Jun 14 2003 |
| Fiji disease virus               | 2          | NC_007154 | 3820 nt  | Jan 5 1999  |
| Fiji disease virus               | 3          | NC_007158 | 3623 nt  | Apr 2 2002  |
| Fiji disease virus               | 4          | NC_007155 | 3568 nt  | Jan 5 1999  |
| Fiji disease virus               | 5          | NC_007160 | 3150 nt  | May 1 2002  |
| Fiji disease virus               | 6          | NC_007157 | 2831 nt  | Apr 2 2002  |



|                                            |       |           |           |             |
|--------------------------------------------|-------|-----------|-----------|-------------|
| Fiji disease virus                         | 7     | NC_007163 | 2194 nt   | Jun 1 2005  |
| Fiji disease virus                         | 8     | NC_007161 | 1959 nt   | Jun 14 2003 |
| Fiji disease virus                         | 9     | NC_007156 | 1843 nt   | Jan 5 1999  |
| Finch polyomavirus                         |       | NC_007923 | 5278 nt   | Mar 19 2006 |
| Flock house virus                          | RNA 1 | NC_004146 | 3107 nt   | Jan 25 1994 |
| Flock house virus                          | RNA 2 | NC_004144 | 1400 nt   | Nov 23 1989 |
| Foot-and-mouth disease virus - type A      |       | NC_011450 | 8161 nt   | Jun 9 2004  |
| Foot-and-mouth disease virus - type Asia 1 |       | NC_004915 | 8167 nt   | Oct 29 2003 |
| Foot-and-mouth disease virus - type C      |       | NC_002554 | 8115 nt   | Nov 19 2002 |
| Foot-and-mouth disease virus - type O      |       | NC_004004 | 8134 nt   | Nov 19 2002 |
| Foot-and-mouth disease virus - type SAT 1  |       | NC_011451 | 8173 nt   | Jun 9 2004  |
| Foot-and-mouth disease virus - type SAT 2  |       | NC_003992 | 8203 nt   | Jun 9 2004  |
| Foot-and-mouth disease virus - type SAT 3  |       | NC_011452 | 8170 nt   | Jun 8 2004  |
| Fowl adenovirus A                          |       | NC_001720 | 43804 nt  | May 16 1996 |
| Fowl adenovirus D                          |       | NC_000899 | 45063 nt  | Mar 8 2002  |
| Fowlpox virus                              |       | NC_002188 | 288539 nt | Mar 6 2002  |
| Foxtail mosaic virus                       |       | NC_001483 | 6151 nt   | Aug 2 1993  |
| Fragaria chiloensis latent virus           | RNA 1 | NC_006566 | 3431 nt   | Nov 28 2004 |
| Fragaria chiloensis latent virus           | RNA 2 | NC_006567 | 2570 nt   | Dec 14 2004 |
| Fragaria chiloensis latent virus           | RNA 3 | NC_006568 | 2484 nt   | Nov 2 2004  |
| Friend murine leukemia virus               |       | NC_001362 | 8323 nt   | Oct 29 1991 |
| Fringilla coelebs papillomavirus           |       | NC_004068 | 7729 nt   | Jul 10 2002 |
| Frog adenovirus 1                          |       | NC_002501 | 26163 nt  | Jul 20 2000 |
| Frog virus 3                               |       | NC_005946 | 105903 nt | Jun 25 2004 |
| Fujinami sarcoma virus                     |       | NC_001403 | 4788 nt   | Jan 21 1998 |
| Fusarium graminearum dsRNA mycovirus-1     |       | NC_006937 | 6624 nt   | Feb 1 2005  |
| Fusarium poae virus 1                      | RNA 1 | NC_003883 | 2185 nt   | Dec 30 1998 |
| Fusarium poae virus 1                      | RNA 2 | NC_003884 | 2203 nt   | Dec 30 1998 |
| GB virus C/Hepatitis G virus               |       | NC_001710 | 9392 nt   | Mar 14 2003 |
| Galinsoga mosaic virus                     |       | NC_001818 | 3803 nt   | Jun 20 1997 |
| Galleria mellonella densovirus             |       | NC_004286 | 6039 nt   | Sep 3 2003  |
| Gallid herpesvirus 1                       |       | NC_006623 | 148687 nt | Jan 14      |

|                                                  |       |           |           |             |
|--------------------------------------------------|-------|-----------|-----------|-------------|
|                                                  |       |           |           | 2005        |
| Gallid herpesvirus 2                             |       | NC_002229 | 174077 nt | May 2 2000  |
| Gallid herpesvirus 3                             |       | NC_002577 | 164270 nt | Oct 12 2000 |
| Garlic virus A                                   |       | NC_003375 | 8660 nt   | Apr 29 1993 |
| Garlic virus C                                   |       | NC_003376 | 8405 nt   | Apr 29 1993 |
| Garlic virus E                                   |       | NC_004012 | 8451 nt   | Feb 6 2002  |
| Garlic virus X                                   |       | NC_001800 | 8106 nt   | Mar 14 1997 |
| Getah virus                                      |       | NC_006558 | 11597 nt  | Sep 29 2004 |
| Giardia lamblia virus                            |       | NC_003555 | 6277 nt   | Apr 19 2002 |
| Gibbon ape leukemia virus                        |       | NC_001885 | 8088 nt   | Aug 2 1993  |
| Goatpox virus Pellor                             |       | NC_004003 | 149599 nt | Jun 5 2002  |
| Goose circovirus                                 |       | NC_003054 | 1821 nt   | Aug 7 2001  |
| Goose hemorrhagic polyomavirus                   |       | NC_004800 | 5256 nt   | May 10 2003 |
| Goose paramyxovirus SF02                         |       | NC_005036 | 15192 nt  | Sep 3 2002  |
| Goose parvovirus                                 |       | NC_001701 | 5106 nt   | Dec 12 1995 |
| Grapevine chrome mosaic virus                    | RNA 1 | NC_003622 | 7212 nt   | Nov 15 2002 |
| Grapevine chrome mosaic virus                    | RNA 2 | NC_003621 | 4441 nt   | Nov 15 2002 |
| Grapevine fanleaf virus                          | RNA 1 | NC_003615 | 7342 nt   | Nov 15 2002 |
| Grapevine fanleaf virus                          | RNA 2 | NC_003623 | 3774 nt   | Nov 15 2002 |
| Grapevine fanleaf virus satellite RNA            |       | NC_003203 | 1114 nt   | Apr 29 1993 |
| Grapevine fleck virus                            |       | NC_003347 | 7564 nt   | Jan 4 2002  |
| Grapevine leafroll-associated virus 2            |       | NC_007448 | 16494 nt  | Oct 5 2005  |
| Grapevine leafroll-associated virus 3            |       | NC_004667 | 17919 nt  | Mar 31 2003 |
| Grapevine rootstock stem lesion associated virus |       | NC_004724 | 16527 nt  | Apr 18 2003 |
| Grapevine virus A                                |       | NC_003604 | 7351 nt   | May 17 1994 |
| Grapevine virus B                                |       | NC_003602 | 7599 nt   | May 17 1994 |
| Grass carp reovirus                              | RNA 1 | NC_005155 | 3949 nt   | Oct 31 2003 |
| Grass carp reovirus                              | RNA 2 | NC_005156 | 3877 nt   | Oct 31 2003 |
| Grass carp reovirus                              | RNA 3 | NC_005157 | 3702 nt   | Oct 31 2003 |
| Grass carp reovirus                              | RNA 4 | NC_005158 | 2320 nt   | Oct 31 2003 |
| Grass carp reovirus                              | RNA 5 | NC_005159 | 2239 nt   | Oct 31      |

|                                                        |           |           |          |             |
|--------------------------------------------------------|-----------|-----------|----------|-------------|
|                                                        |           |           |          | 2003        |
| Grass carp reovirus                                    | RNA 6     | NC_005160 | 2039 nt  | Oct 31 2003 |
| Grass carp reovirus                                    | RNA 7     | NC_005161 | 1414 nt  | Oct 31 2003 |
| Grass carp reovirus                                    | RNA 8     | NC_005154 | 1296 nt  | Oct 29 2003 |
| Grass carp reovirus                                    | RNA 9     | NC_005162 | 1130 nt  | Oct 31 2003 |
| Grass carp reovirus                                    | RNA 10    | NC_005163 | 909 nt   | Oct 31 2003 |
| Grass carp reovirus                                    | RNA 11    | NC_005164 | 820 nt   | Oct 31 2003 |
| Gremmeniella abietina RNA virus L1                     |           | NC_003876 | 5133 nt  | Feb 21 2001 |
| Gremmeniella abietina RNA virus L2                     |           | NC_005965 | 5129 nt  | Jun 27 2004 |
| Gremmeniella abietina RNA virus MS1                    | RNA 1     | NC_004018 | 1782 nt  | Apr 17 2002 |
| Gremmeniella abietina RNA virus MS1                    | RNA 2     | NC_004019 | 1586 nt  | Apr 17 2002 |
| Gremmeniella abietina RNA virus MS1                    | RNA 3     | NC_004020 | 1186 nt  | Apr 17 2002 |
| Gremmeniella abietina RNA virus MS2                    | RNA 1     | NC_006444 | 1781 nt  | Nov 13 2004 |
| Gremmeniella abietina RNA virus MS2                    | RNA 2     | NC_006445 | 1586 nt  | Nov 13 2004 |
| Gremmeniella abietina RNA virus MS2                    | RNA 3     | NC_006446 | 1186 nt  | Nov 13 2004 |
| Gremmeniella abietina mitochondrial RNA virus S2       |           | NC_006264 | 2587 nt  | Jun 27 2004 |
| Gremmeniella abietina type B RNA virus XL              |           | NC_007920 | 10375 nt | Mar 24 2006 |
| Ground squirrel hepatitis virus                        |           | NC_001484 | 3311 nt  | Aug 2 1993  |
| Groundnut bud necrosis virus                           | Segment L | NC_003614 | 8911 nt  | Jan 1 1998  |
| Groundnut bud necrosis virus                           | Segment M | NC_003620 | 4801 nt  | Jun 5 1996  |
| Groundnut bud necrosis virus                           | Segment S | NC_003619 | 3057 nt  | Jun 28 1995 |
| Groundnut rosette virus                                |           | NC_003603 | 4019 nt  | Jun 1 1996  |
| Groundnut rosette virus Malawi chlorotic satellite RNA |           | NC_006455 | 901 nt   | Nov 19 2004 |
| Groundnut rosette virus Nigerian green satellite RNA   |           | NC_006456 | 898 nt   | Nov 19 2004 |
| Groundnut rosette virus Nigerian mild satellite RNA    |           | NC_006457 | 896 nt   | Nov 19 2004 |
| Groundnut rosette virus Yellow blotch satellite RNA    |           | NC_006454 | 902 nt   | Nov 19 2004 |
| Groundnut rosette virus satellite RNA                  |           | NC_002738 | 893 nt   | Jun 8 2000  |
| Guanarito virus                                        | segment L | NC_005082 | 7081 nt  | Aug 30 2003 |
| Guanarito virus                                        | segment S | NC_005077 | 3343 nt  | Aug 30 2003 |
| Halovirus HF1                                          |           | NC_004927 | 75898 nt | Jul 7 2003  |
| Hamster polyomavirus                                   |           | NC_001663 | 5366 nt  | Oct 12 1988 |

|                                                          |           |           |           |             |
|----------------------------------------------------------|-----------|-----------|-----------|-------------|
| Hantaan virus                                            | segment L | NC_005222 | 6533 nt   | Nov 15 1990 |
| Hantaan virus                                            | segment M | NC_005219 | 3616 nt   | Nov 18 2003 |
| Hantaan virus                                            | segment S | NC_005218 | 1696 nt   | Nov 18 2003 |
| Hantavirus Z10                                           | segment L | NC_006435 | 6533 nt   | Oct 28 1999 |
| Hantavirus Z10                                           | segment M | NC_006437 | 3616 nt   | Jul 26 2000 |
| Hantavirus Z10                                           | segment S | NC_006433 | 1701 nt   | Oct 7 1999  |
| Hantavirus Z37                                           | segment L | NC_006438 | 6530 nt   | Oct 30 2000 |
| Hantavirus Z37                                           | segment M | NC_006436 | 3651 nt   | Nov 21 1999 |
| Hantavirus Z37                                           | segment S | NC_006434 | 1754 nt   | Oct 7 1999  |
| Helicobasidium mompa No.17 dsRNA virus                   | segment L | NC_005074 | 5207 nt   | Aug 19 2003 |
| Helicobasidium mompa No.17 dsRNA virus                   | segment S | NC_005075 | 2096 nt   | Aug 19 2003 |
| Helicoverpa armigera nuclear polyhedrosis virus          |           | NC_003094 | 130759 nt | Aug 12 2004 |
| Helicoverpa armigera nucleopolyhedrovirus G4             |           | NC_002654 | 131403 nt | Mar 7 2002  |
| Helicoverpa armigera stunt virus                         | RNA 1     | NC_001981 | 5312 nt   | Dec 18 1994 |
| Helicoverpa armigera stunt virus                         | RNA 2     | NC_001982 | 2478 nt   | Jan 2 1995  |
| Helicoverpa zea single nucleocapsid nucleopolyhedrovirus |           | NC_003349 | 130869 nt | Jan 1 2002  |
| Heliothis zea virus 1                                    |           | NC_004156 | 228089 nt | Jun 1 2002  |
| Helminthosporium victoriae 145S virus                    | segment 1 | NC_005978 | 3612 nt   | Jul 10 2004 |
| Helminthosporium victoriae 145S virus                    | segment 2 | NC_005979 | 3134 nt   | Jul 10 2004 |
| Helminthosporium victoriae 145S virus                    | segment 3 | NC_005980 | 2972 nt   | Jul 10 2004 |
| Helminthosporium victoriae 145S virus                    | segment 4 | NC_005981 | 2763 nt   | Jul 10 2004 |
| Helminthosporium victoriae virus 190S                    |           | NC_003607 | 5178 nt   | Jan 4 1998  |
| Hendra virus                                             |           | NC_001906 | 18234 nt  | Jul 1 1998  |
| Hepatitis A virus                                        |           | NC_001489 | 7478 nt   | Nov 19 2002 |
| Hepatitis B virus                                        |           | NC_003977 | 3215 nt   | Oct 13 2005 |
| Hepatitis C virus                                        |           | NC_004102 | 9646 nt   | Dec 5 2002  |
| Hepatitis E virus                                        |           | NC_001434 | 7176 nt   | Aug 2 1993  |
| Hepatitis GB virus A                                     |           | NC_001837 | 9550 nt   | Mar 14 2003 |
| Hepatitis GB virus B                                     |           | NC_001655 | 9399 nt   | Dec 9 2002  |
| Hepatitis delta virus                                    |           | NC_001653 | 1682 nt   | Mar 7 2002  |
| Hepatopancreatic parvovirus of penaeid shrimp            |           | NC_007218 | 6321 nt   | Jun 30 2005 |

|                                                          |       |           |          |             |
|----------------------------------------------------------|-------|-----------|----------|-------------|
| Heron hepatitis B virus                                  |       | NC_001486 | 3027 nt  | Aug 2 1993  |
| Heterocapsa circularisquama RNA virus                    |       | NC_007518 | 4375 nt  | Oct 27 2005 |
| Heterosigma akashiwo RNA virus                           |       | NC_005281 | 8587 nt  | Dec 5 2003  |
| Hibiscus chlorotic ringspot virus                        |       | NC_003608 | 3911 nt  | Mar 17 2000 |
| Himetobi P virus                                         |       | NC_003782 | 9275 nt  | Aug 30 1998 |
| Hirame rhabdovirus                                       |       | NC_005093 | 11034 nt | Sep 13 2003 |
| His1 virus                                               |       | NC_007914 | 14462 nt | Mar 20 2006 |
| His2 virus                                               |       | NC_007918 | 16067 nt | Mar 20 2006 |
| Hollyhock leaf crumple virus                             |       | NC_004071 | 2755 nt  | Jan 8 2002  |
| Hollyhock leaf crumple virus satellite DNA               |       | NC_004092 | 741 nt   | Aug 2 2002  |
| Honeysuckle yellow vein mosaic virus                     |       | NC_003609 | 2757 nt  | Aug 1 2000  |
| Honeysuckle yellow vein mosaic virus-associated DNA beta |       | NC_005052 | 1344 nt  | Jul 29 2003 |
| Honeysuckle yellow vein virus                            |       | NC_005807 | 2784 nt  | Mar 12 2004 |
| Hop latent virus                                         |       | NC_002552 | 8612 nt  | Nov 15 2002 |
| Hordeum mosaic virus                                     |       | NC_005904 | 9463 nt  | Aug 11 2004 |
| Horsegram yellow mosaic virus                            | DNA A | NC_005635 | 2728 nt  | Feb 25 2004 |
| Horsegram yellow mosaic virus                            | DNA B | NC_005636 | 2677 nt  | Feb 25 2004 |
| Horseradish curly top virus                              |       | NC_002543 | 3080 nt  | Apr 4 1996  |
| Human T-lymphotropic virus 1                             |       | NC_001436 | 8507 nt  | Jan 12 2004 |
| Human T-lymphotropic virus 2                             |       | NC_001488 | 8952 nt  | Dec 18 2003 |
| Human adenovirus A                                       |       | NC_001460 | 34125 nt | Jul 6 1993  |
| Human adenovirus B                                       |       | NC_004001 | 34794 nt | Jun 9 2003  |
| Human adenovirus C                                       |       | NC_001405 | 35937 nt | Apr 27 1993 |
| Human adenovirus D                                       |       | NC_002067 | 35100 nt | Mar 11 2002 |
| Human adenovirus E                                       |       | NC_003266 | 35994 nt | Aug 24 2004 |
| Human adenovirus F                                       |       | NC_001454 | 34214 nt | Jul 26 1993 |
| Human adenovirus type 11                                 |       | AC_000015 | 34794 nt | Dec 1 2004  |
| Human adenovirus type 35                                 |       | AC_000019 | 34794 nt | Dec 1 2004  |
| Human adenovirus type 7                                  |       | AC_000018 | 35514 nt | Dec 1 2004  |
| Human astrovirus                                         |       | NC_001943 | 6813 nt  | Dec 4       |

|                                    |           |           |             |
|------------------------------------|-----------|-----------|-------------|
|                                    |           |           | 2002        |
| Human bocavirus                    | NC_007455 | 5299 nt   | Oct 5 2005  |
| Human coronavirus 229E             | NC_002645 | 27317 nt  | Apr 18 2003 |
| Human coronavirus HKU1             | NC_006577 | 29926 nt  | Jan 25 2006 |
| Human coronavirus NL63             | NC_005831 | 27553 nt  | Mar 23 2004 |
| Human coronavirus OC43             | NC_005147 | 30738 nt  | Oct 29 2003 |
| Human enterovirus A                | NC_001612 | 7413 nt   | Nov 19 2002 |
| Human enterovirus B                | NC_001472 | 7389 nt   | Nov 19 2002 |
| Human enterovirus C                | NC_001428 | 7401 nt   | Nov 19 2002 |
| Human enterovirus D                | NC_001430 | 7390 nt   | Nov 27 2003 |
| Human erythrovirus V9              | NC_004295 | 5028 nt   | Sep 30 2001 |
| Human foamy virus                  | NC_001736 | 13242 nt  | Oct 8 1996  |
| Human herpesvirus 1                | NC_001806 | 152261 nt | Apr 3 1990  |
| Human herpesvirus 2                | NC_001798 | 154746 nt | Feb 27 1997 |
| Human herpesvirus 3 (strain Dumas) | NC_001348 | 124884 nt | Sep 19 1987 |
| Human herpesvirus 4                | NC_007605 | 171823 nt | Nov 17 2005 |
| Human herpesvirus 5 strain AD169   | NC_001347 | 230287 nt | Mar 7 1990  |
| Human herpesvirus 5 strain Merlin  | NC_006273 | 235645 nt | Sep 16 2004 |
| Human herpesvirus 6                | NC_001664 | 159321 nt | Jun 5 1995  |
| Human herpesvirus 6B               | NC_000898 | 162114 nt | Mar 8 2002  |
| Human herpesvirus 7                | NC_001716 | 153080 nt | Sep 3 2004  |
| Human herpesvirus 8                | NC_003409 | 137508 nt | Dec 11 1996 |
| Human immunodeficiency virus 1     | NC_001802 | 9181 nt   | Dec 23 2003 |
| Human immunodeficiency virus 2     | NC_001722 | 10359 nt  | Jul 17 2002 |
| Human metapneumovirus              | NC_004148 | 13335 nt  | Apr 29 2004 |
| Human papillomavirus - 1           | NC_001356 | 7815 nt   | Nov 3 1982  |
| Human papillomavirus - 10          | NC_001576 | 7919 nt   | Aug 22 1993 |
| Human papillomavirus - 16          | NC_001526 | 7904 nt   | Aug 2 1993  |
| Human papillomavirus - 18          | NC_001357 | 7857 nt   | Sep 19 1987 |
| Human papillomavirus - 2           | NC_001352 | 7860 nt   | Mar 2 2001  |

|                              |           |          |             |
|------------------------------|-----------|----------|-------------|
| Human papillomavirus - 26    | NC_001583 | 7855 nt  | Aug 22 1993 |
| Human papillomavirus - 32    | NC_001586 | 7961 nt  | Aug 22 1993 |
| Human papillomavirus - 34    | NC_001587 | 7723 nt  | Aug 22 1993 |
| Human papillomavirus - 4     | NC_001457 | 7353 nt  | Jun 15 1993 |
| Human papillomavirus - 5     | NC_001531 | 7746 nt  | May 11 1994 |
| Human papillomavirus - 53    | NC_001593 | 7856 nt  | Aug 22 1993 |
| Human papillomavirus - 54    | NC_001676 | 7759 nt  | Oct 12 1995 |
| Human papillomavirus - 61    | NC_001694 | 7989 nt  | Oct 18 1995 |
| Human papillomavirus RTRX7   | NC_004761 | 7731 nt  | May 2 2003  |
| Human papillomavirus type 24 | NC_001683 | 7452 nt  | Oct 17 1995 |
| Human papillomavirus type 41 | NC_001354 | 7614 nt  | Jun 14 1991 |
| Human papillomavirus type 48 | NC_001690 | 7100 nt  | Oct 17 1995 |
| Human papillomavirus type 49 | NC_001591 | 7560 nt  | Aug 22 1993 |
| Human papillomavirus type 50 | NC_001691 | 7184 nt  | Oct 17 1995 |
| Human papillomavirus type 60 | NC_001693 | 7313 nt  | Oct 18 1995 |
| Human papillomavirus type 63 | NC_001458 | 7348 nt  | Jun 15 1993 |
| Human papillomavirus type 6b | NC_001355 | 7902 nt  | Feb 20 1985 |
| Human papillomavirus type 7  | NC_001595 | 8027 nt  | Aug 22 1993 |
| Human papillomavirus type 71 | NC_002644 | 8017 nt  | Mar 11 2002 |
| Human papillomavirus type 9  | NC_001596 | 7434 nt  | Aug 22 1993 |
| Human papillomavirus type 90 | NC_004104 | 8033 nt  | Aug 5 2002  |
| Human papillomavirus type 92 | NC_004500 | 7461 nt  | Jan 7 2003  |
| Human papillomavirus type 96 | NC_005134 | 7438 nt  | Oct 9 2003  |
| Human parainfluenza virus 1  | NC_003461 | 15600 nt | Mar 15 2002 |
| Human parainfluenza virus 2  | NC_003443 | 15646 nt | Jul 10 1991 |
| Human parainfluenza virus 3  | NC_001796 | 15462 nt | Mar 20 2002 |
| Human parechovirus           | NC_001897 | 7348 nt  | Nov 19 2002 |
| Human parvovirus 4           | NC_007018 | 5268 nt  | May 1 2005  |
| Human picobirnavirus         | NC_007026 | 2525 nt  | May 7 2005  |

|                                              |           |           |           |             |
|----------------------------------------------|-----------|-----------|-----------|-------------|
| Human picobirnavirus                         | 2         | NC_007027 | 1745 nt   | May 7 2005  |
| Human respiratory syncytial virus            |           | NC_001781 | 15225 nt  | Nov 2 1997  |
| Human rhinovirus A                           |           | NC_001617 | 7152 nt   | Nov 19 2002 |
| Human rhinovirus B                           |           | NC_001490 | 7212 nt   | Nov 19 2002 |
| Human rotavirus (group C / strain Bristol)   | 6         | NC_007543 | 1350 nt   | Nov 7 2005  |
| Human rotavirus G3                           | 1         | NC_007473 | 3302 nt   | Oct 5 2005  |
| Human rotavirus G3                           | 10        | NC_007464 | 751 nt    | Oct 5 2005  |
| Human rotavirus G3                           | 11        | NC_007463 | 1043 nt   | Oct 5 2005  |
| Human rotavirus G3                           | 2         | NC_007472 | 2687 nt   | Oct 5 2005  |
| Human rotavirus G3                           | 3         | NC_007471 | 2591 nt   | Oct 5 2005  |
| Human rotavirus G3                           | 4         | NC_007470 | 2361 nt   | Oct 5 2005  |
| Human rotavirus G3                           | 5         | NC_007467 | 1591 nt   | Oct 5 2005  |
| Human rotavirus G3                           | 6         | NC_007469 | 1356 nt   | Oct 5 2005  |
| Human rotavirus G3                           | 7         | NC_007466 | 1059 nt   | Oct 5 2005  |
| Human rotavirus G3                           | 8         | NC_007465 | 1078 nt   | Oct 5 2005  |
| Human rotavirus G3                           | 9         | NC_007468 | 1062 nt   | Oct 5 2005  |
| Human spumaretrovirus                        |           | NC_001795 | 11954 nt  | Jan 12 2004 |
| Humulus japonicus latent virus               | RNA 1     | NC_006064 | 3382 nt   | Jul 21 2004 |
| Humulus japonicus latent virus               | RNA 2     | NC_006065 | 2810 nt   | Jul 21 2004 |
| Humulus japonicus latent virus               | RNA 3     | NC_006066 | 1938 nt   | Jul 21 2004 |
| Hyacinth bean yellow mosaic Bangladesh virus |           | NC_005338 | 2761 nt   | Jan 21 2004 |
| Hydrangea ringspot virus                     |           | NC_006943 | 6185 nt   | Mar 1 2005  |
| Hyphantria cunea nucleopolyhedrovirus        |           | NC_007767 | 132959 nt | Jan 31 2006 |
| Ictalurid herpesvirus 1                      |           | NC_001493 | 134226 nt | Aug 2 1993  |
| Impatiens necrotic spot virus                | Segment L | NC_003625 | 8776 nt   | Apr 16 2002 |
| Impatiens necrotic spot virus                | Segment M | NC_003616 | 4972 nt   | Aug 2 1993  |
| Impatiens necrotic spot virus                | Segment S | NC_003624 | 2992 nt   | Sep 14 1992 |
| Indian cassava mosaic virus                  | DNA A     | NC_001932 | 2815 nt   | Jul 29 1993 |
| Indian cassava mosaic virus                  | DNA B     | NC_001933 | 2645 nt   | Jul 29 1993 |
| Indian citrus ringspot virus                 |           | NC_003093 | 7560 nt   | Sep 2 2001  |
| Indian peanut clump virus                    | RNA 1     | NC_004729 | 5841 nt   | Apr 18 2003 |
| Indian peanut clump virus                    | RNA 2     | NC_004730 | 4507 nt   | Apr 17 2003 |
| Infectious bursal disease virus              | segment A | NC_004178 | 3183 nt   | May 3 1996  |
| Infectious bursal disease virus              | segment B | NC_004179 | 2715 nt   | May 3       |



|                                                        |           |           |           |                       |
|--------------------------------------------------------|-----------|-----------|-----------|-----------------------|
| Infectious flacherie virus                             |           | NC_003781 | 9650 nt   | 1996<br>Apr 5<br>1998 |
| Infectious hematopoietic necrosis virus                |           | NC_001652 | 11131 nt  | Mar 22<br>1995        |
| Infectious hypodermal and hematopoietic necrosis virus |           | NC_002190 | 4075 nt   | Mar 24<br>2000        |
| Infectious pancreatic necrosis virus                   | segment A | NC_001915 | 3097 nt   | Aug 2<br>1993         |
| Infectious pancreatic necrosis virus                   | segment B | NC_001916 | 2784 nt   | Aug 2<br>1993         |
| Infectious salmon anemia virus                         | 1         | NC_006505 | 2169 nt   | Dec 7<br>2004         |
| Infectious salmon anemia virus                         | 2         | NC_006503 | 2185 nt   | Dec 7<br>2004         |
| Infectious salmon anemia virus                         | 3         | NC_006502 | 2046 nt   | Dec 7<br>2004         |
| Infectious salmon anemia virus                         | 4         | NC_006501 | 1787 nt   | Dec 8<br>2004         |
| Infectious salmon anemia virus                         | 5         | NC_006500 | 1504 nt   | Dec 7<br>2004         |
| Infectious salmon anemia virus                         | 6         | NC_006499 | 1323 nt   | Dec 7<br>2004         |
| Infectious salmon anemia virus                         | 7         | NC_006498 | 966 nt    | Dec 7<br>2004         |
| Infectious salmon anemia virus                         | 8         | NC_006497 | 736 nt    | Dec 7<br>2004         |
| Infectious spleen and kidney necrosis virus            |           | NC_003494 | 111362 nt | Mar 28<br>2002        |
| Influenza A virus (A/Goose/Guangdong/1/96(H5N1))       | segment 1 | NC_007357 | 2341 nt   | Aug 26<br>2005        |
| Influenza A virus (A/Goose/Guangdong/1/96(H5N1))       | segment 2 | NC_007358 | 2341 nt   | Feb 3 2006            |
| Influenza A virus (A/Goose/Guangdong/1/96(H5N1))       | segment 3 | NC_007359 | 2233 nt   | Aug 26<br>2005        |
| Influenza A virus (A/Goose/Guangdong/1/96(H5N1))       | segment 4 | NC_007362 | 1760 nt   | Aug 26<br>2005        |
| Influenza A virus (A/Goose/Guangdong/1/96(H5N1))       | segment 5 | NC_007360 | 1565 nt   | Aug 26<br>2005        |
| Influenza A virus (A/Goose/Guangdong/1/96(H5N1))       | segment 6 | NC_007361 | 1458 nt   | Aug 30<br>2005        |
| Influenza A virus (A/Goose/Guangdong/1/96(H5N1))       | segment 7 | NC_007363 | 1027 nt   | Aug 26<br>2005        |
| Influenza A virus (A/Goose/Guangdong/1/96(H5N1))       | segment 8 | NC_007364 | 865 nt    | Aug 26<br>2005        |
| Influenza A virus (A/Hong Kong/1073/99(H9N2))          | segment 1 | NC_004910 | 2341 nt   | Jun 21<br>2003        |
| Influenza A virus (A/Hong Kong/1073/99(H9N2))          | segment 2 | NC_004911 | 2328 nt   | Feb 3 2006            |
| Influenza A virus (A/Hong Kong/1073/99(H9N2))          | segment 3 | NC_004912 | 2225 nt   | Jun 21<br>2003        |
| Influenza A virus (A/Hong Kong/1073/99(H9N2))          | segment 4 | NC_004908 | 1714 nt   | Jun 21<br>2003        |
| Influenza A virus (A/Hong Kong/1073/99(H9N2))          | segment 5 | NC_004905 | 1565 nt   | Jun 21<br>2003        |
| Influenza A virus (A/Hong Kong/1073/99(H9N2))          | segment 6 | NC_004909 | 1418 nt   | Jun 21<br>2003        |
| Influenza A virus (A/Hong Kong/1073/99(H9N2))          | segment 7 | NC_004907 | 1025 nt   | Jun 23<br>2003        |

|                                               |           |           |         |             |
|-----------------------------------------------|-----------|-----------|---------|-------------|
| Influenza A virus (A/Hong Kong/1073/99(H9N2)) | segment 8 | NC_004906 | 890 nt  | Jun 21 2003 |
| Influenza A virus (A/Korea/426/68(H2N2))      | segment 1 | NC_007378 | 2341 nt | Aug 30 2005 |
| Influenza A virus (A/Korea/426/68(H2N2))      | segment 2 | NC_007375 | 2341 nt | Aug 30 2005 |
| Influenza A virus (A/Korea/426/68(H2N2))      | segment 3 | NC_007376 | 2233 nt | Aug 30 2005 |
| Influenza A virus (A/Korea/426/68(H2N2))      | segment 4 | NC_007374 | 1773 nt | Aug 30 2005 |
| Influenza A virus (A/Korea/426/68(H2N2))      | segment 5 | NC_007381 | 1497 nt | Aug 30 2005 |
| Influenza A virus (A/Korea/426/68(H2N2))      | segment 6 | NC_007382 | 1410 nt | Aug 30 2005 |
| Influenza A virus (A/Korea/426/68(H2N2))      | segment 7 | NC_007377 | 1027 nt | Aug 30 2005 |
| Influenza A virus (A/Korea/426/68(H2N2))      | segment 8 | NC_007380 | 838 nt  | Aug 30 2005 |
| Influenza A virus (A/New York/392/2004(H3N2)) | segment 1 | NC_007373 | 2341 nt | Aug 30 2005 |
| Influenza A virus (A/New York/392/2004(H3N2)) | segment 2 | NC_007372 | 2341 nt | Aug 30 2005 |
| Influenza A virus (A/New York/392/2004(H3N2)) | segment 3 | NC_007371 | 2233 nt | Aug 30 2005 |
| Influenza A virus (A/New York/392/2004(H3N2)) | segment 4 | NC_007366 | 1762 nt | Aug 30 2005 |
| Influenza A virus (A/New York/392/2004(H3N2)) | segment 5 | NC_007369 | 1566 nt | Aug 30 2005 |
| Influenza A virus (A/New York/392/2004(H3N2)) | segment 6 | NC_007368 | 1467 nt | Aug 30 2005 |
| Influenza A virus (A/New York/392/2004(H3N2)) | segment 7 | NC_007367 | 1027 nt | Aug 30 2005 |
| Influenza A virus (A/New York/392/2004(H3N2)) | segment 8 | NC_007370 | 890 nt  | Aug 30 2005 |
| Influenza A virus (A/Puerto Rico/8/34(H1N1))  | segment 1 | NC_002023 | 2341 nt | Nov 3 1982  |
| Influenza A virus (A/Puerto Rico/8/34(H1N1))  | segment 2 | NC_002021 | 2341 nt | Dec 2 2005  |
| Influenza A virus (A/Puerto Rico/8/34(H1N1))  | segment 3 | NC_002022 | 2233 nt | Nov 3 1982  |
| Influenza A virus (A/Puerto Rico/8/34(H1N1))  | segment 4 | NC_002017 | 1778 nt | Dec 15 2004 |
| Influenza A virus (A/Puerto Rico/8/34(H1N1))  | segment 5 | NC_002019 | 1565 nt | Aug 2 1993  |
| Influenza A virus (A/Puerto Rico/8/34(H1N1))  | segment 6 | NC_002018 | 1413 nt | Aug 2 1993  |
| Influenza A virus (A/Puerto Rico/8/34(H1N1))  | segment 7 | NC_002016 | 1027 nt | Jun 9 1982  |
| Influenza A virus (A/Puerto Rico/8/34(H1N1))  | segment 8 | NC_002020 | 890 nt  | Aug 2 1993  |
| Influenza B virus                             | RNA 1     | NC_002204 | 2368 nt | Aug 2 1993  |
| Influenza B virus                             | RNA 2     | NC_002205 | 2313 nt | Nov 10 1999 |
| Influenza B virus                             | RNA 3     | NC_002206 | 2204 nt | Nov 10 1999 |
| Influenza B virus                             | RNA 4     | NC_002207 | 1882 nt | Aug 2 1993  |

|                                            |           |           |           |             |
|--------------------------------------------|-----------|-----------|-----------|-------------|
| Influenza B virus                          | RNA 5     | NC_002208 | 1841 nt   | Aug 2 1993  |
| Influenza B virus                          | RNA 6     | NC_002209 | 1557 nt   | Aug 2 1993  |
| Influenza B virus                          | RNA 7     | NC_002210 | 1191 nt   | Dec 2 2005  |
| Influenza B virus                          | RNA 8     | NC_002211 | 1096 nt   | Aug 2 1993  |
| Influenza C virus                          | segment 1 | NC_006307 | 2325 nt   | Sep 24 2004 |
| Influenza C virus                          | segment 2 | NC_006308 | 2265 nt   | Sep 24 2004 |
| Influenza C virus                          | segment 3 | NC_006309 | 2130 nt   | Sep 24 2004 |
| Influenza C virus                          | segment 4 | NC_006310 | 1968 nt   | Sep 24 2004 |
| Influenza C virus                          | segment 5 | NC_006311 | 1807 nt   | Sep 24 2004 |
| Influenza C virus                          | segment 6 | NC_006312 | 1125 nt   | Sep 24 2004 |
| Influenza C virus                          | segment 7 | NC_006306 | 881 nt    | Sep 24 2004 |
| Invertebrate iridescent virus 6            |           | NC_003038 | 212482 nt | Oct 4 1994  |
| Ippy virus                                 |           | NC_007905 | 3366 nt   | Mar 16 2006 |
| Ippy virus                                 |           | NC_007906 | 7316 nt   | Mar 16 2006 |
| J-virus                                    |           | NC_007454 | 18954 nt  | Oct 5 2005  |
| JC polyomavirus                            |           | NC_001699 | 5130 nt   | Aug 2 1993  |
| Japanese encephalitis virus                |           | NC_001437 | 10976 nt  | Jan 13 2003 |
| Japanese iris necrotic ring virus          |           | NC_002187 | 4014 nt   | Mar 17 2000 |
| Japanese yam mosaic virus                  |           | NC_000947 | 9760 nt   | Nov 15 2002 |
| Jembrana disease virus                     |           | NC_001654 | 7732 nt   | Mar 28 1995 |
| Johnsongrass chlorotic stripe mosaic virus |           | NC_005287 | 4421 nt   | Dec 6 2003  |
| Johnsongrass mosaic virus                  |           | NC_003606 | 9779 nt   | Nov 15 2002 |
| Junin virus                                | segment L | NC_005080 | 7114 nt   | Aug 30 2003 |
| Junin virus                                | segment S | NC_005081 | 3411 nt   | Jan 13 2004 |
| Junonia coenia densovirus                  |           | NC_004284 | 5908 nt   | May 8 1993  |
| Kadipiro virus                             | segment 1 | NC_004210 | 3774 nt   | Jun 27 2000 |
| Kadipiro virus                             | segment 2 | NC_004212 | 3035 nt   | Jun 27 2000 |
| Kadipiro virus                             | segment 3 | NC_004213 | 2415 nt   | Jun 27 2000 |
| Kadipiro virus                             | segment 4 | NC_004214 | 2121 nt   | Jun 27 2000 |

|                                       |            |           |          |             |
|---------------------------------------|------------|-----------|----------|-------------|
| Kadipiro virus                        | segment 5  | NC_004215 | 1947 nt  | Jun 27 2000 |
| Kadipiro virus                        | segment 6  | NC_004216 | 1670 nt  | Jun 27 2000 |
| Kadipiro virus                        | segment 7  | NC_004209 | 1259 nt  | Nov 7 1998  |
| Kadipiro virus                        | segment 8  | NC_004208 | 1114 nt  | Nov 7 1998  |
| Kadipiro virus                        | segment 9  | NC_004207 | 1054 nt  | Nov 7 1998  |
| Kadipiro virus                        | segment 10 | NC_004206 | 946 nt   | Nov 7 1998  |
| Kadipiro virus                        | segment 11 | NC_004205 | 894 nt   | Nov 7 1998  |
| Kadipiro virus                        | segment 12 | NC_004199 | 756 nt   | Nov 6 1998  |
| Kakugo virus                          |            | NC_005876 | 10152 nt | May 14 2004 |
| Kalanchoe top-spotting virus          |            | NC_004540 | 7591 nt  | Jan 22 2003 |
| Kamiti River virus                    |            | NC_005064 | 11375 nt | Aug 13 2003 |
| Karshi virus                          |            | NC_006947 | 10653 nt | Jan 24 2005 |
| Kashmir bee virus                     |            | NC_004807 | 9524 nt  | May 12 2003 |
| Kelp fly virus                        |            | NC_007619 | 11034 nt | Oct 20 2005 |
| Kennedya yellow mosaic virus          |            | NC_001746 | 6362 nt  | Apr 29 1993 |
| Konjak mosaic virus                   |            | NC_007913 | 9544 nt  | Mar 17 2006 |
| Kyuri green mottle mosaic virus       |            | NC_003610 | 6514 nt  | Jul 27 2001 |
| La Crosse virus                       | segment L  | NC_004108 | 6980 nt  | Aug 13 2002 |
| La Crosse virus                       | segment M  | NC_004109 | 4527 nt  | Aug 13 2002 |
| La Crosse virus                       | segment S  | NC_004110 | 984 nt   | Aug 13 2002 |
| Lactate dehydrogenase-elevating virus |            | NC_002534 | 14225 nt | Jun 12 1993 |
| Lake Victoria marburgvirus            |            | NC_001608 | 19112 nt | Jan 26 1994 |
| Langat virus                          |            | NC_003690 | 10943 nt | Oct 25 2004 |
| Lassa virus                           | segment L  | NC_004297 | 7279 nt  | Mar 17 1998 |
| Lassa virus                           | segment S  | NC_004296 | 3402 nt  | Aug 2 1993  |
| Leek white stripe virus               |            | NC_001822 | 3662 nt  | Jan 17 1996 |
| Leek yellow stripe virus              |            | NC_004011 | 10142 nt | Feb 5 2002  |
| Leishmania RNA virus 1 - 1            |            | NC_002063 | 5284 nt  | Aug 2 1993  |
| Leishmania RNA virus 1-4              |            | NC_003601 | 5283 nt  | Nov 5 1993  |

|                                  |       |           |          |             |
|----------------------------------|-------|-----------|----------|-------------|
| Leishmania RNA virus 2-1         |       | NC_002064 | 5241 nt  | Oct 31 1995 |
| Lettuce infectious yellows virus | RNA 1 | NC_003617 | 8118 nt  | Nov 15 2002 |
| Lettuce infectious yellows virus | RNA 2 | NC_003618 | 7193 nt  | Jan 29 1995 |
| Lettuce mosaic virus             |       | NC_003605 | 10080 nt | Nov 15 2002 |
| Lettuce necrotic yellows virus   |       | NC_007642 | 12807 nt | Dec 15 2005 |
| Lettuce ring necrosis virus      | RNA 1 | NC_006051 | 7651 nt  | Jul 16 2004 |
| Lettuce ring necrosis virus      | RNA 2 | NC_006052 | 1830 nt  | Jul 16 2004 |
| Lettuce ring necrosis virus      | RNA 3 | NC_006053 | 1527 nt  | Jul 16 2004 |
| Lettuce ring necrosis virus      | RNA 4 | NC_006054 | 1417 nt  | Jul 16 2004 |
| Liao ning virus                  | 1     | NC_007736 | 3740 nt  | Jan 27 2006 |
| Liao ning virus                  | 10    | NC_007745 | 903 nt   | Jan 26 2006 |
| Liao ning virus                  | 11    | NC_007746 | 897 nt   | Jan 26 2006 |
| Liao ning virus                  | 12    | NC_007747 | 760 nt   | Jan 26 2006 |
| Liao ning virus                  | 2     | NC_007737 | 3055 nt  | Jan 27 2006 |
| Liao ning virus                  | 3     | NC_007738 | 2404 nt  | Jan 27 2006 |
| Liao ning virus                  | 4     | NC_007739 | 2062 nt  | Jan 27 2006 |
| Liao ning virus                  | 5     | NC_007740 | 1870 nt  | Jan 27 2006 |
| Liao ning virus                  | 6     | NC_007741 | 1750 nt  | Jan 27 2006 |
| Liao ning virus                  | 7     | NC_007742 | 1208 nt  | Jan 26 2006 |
| Liao ning virus                  | 8     | NC_007743 | 1147 nt  | Jan 26 2006 |
| Liao ning virus                  | 9     | NC_007744 | 943 nt   | Jan 26 2006 |
| Lily mottle virus                |       | NC_005288 | 9644 nt  | Dec 6 2003  |
| Lily symptomless virus           |       | NC_005138 | 8394 nt  | Sep 22 2003 |
| Lily virus X                     |       | NC_007192 | 5823 nt  | Jul 5 2005  |
| Little cherry virus 1            |       | NC_001836 | 16934 nt | Nov 15 2002 |
| Little cherry virus 2            |       | NC_005065 | 15045 nt | Aug 13 2003 |
| Ljungan virus                    |       | NC_003976 | 7607 nt  | Oct 15 2002 |
| Loofa yellow mosaic virus        | DNA A | NC_004824 | 2742 nt  | Jun 6 2003  |
| Loofa yellow mosaic virus        | DNA B | NC_004825 | 2713 nt  | Jun 6 2003  |
| Louping ill virus                |       | NC_001809 | 10871 nt | Nov 19      |

|                                                         |           |           |           |             |
|---------------------------------------------------------|-----------|-----------|-----------|-------------|
|                                                         |           |           |           | 2002        |
| Lull virus                                              |           | NC_004713 | 5135 nt   | Apr 11 2003 |
| Lucerne transient streak virus                          |           | NC_001696 | 4275 nt   | Nov 15 2002 |
| Lucerne transient streak virus satellite RNA            |           | NC_003798 | 324 nt    | Jan 28 1986 |
| Ludwigia yellow vein virus                              |           | NC_007210 | 2758 nt   | Jul 21 2005 |
| Ludwigia yellow vein virus-associated DNA beta          |           | NC_007212 | 1347 nt   | Aug 2 2005  |
| Luffa puckering and leaf distortion-associated DNA beta |           | NC_007459 | 1358 nt   | Sep 22 2005 |
| Lumpy skin disease virus NI-2490                        |           | NC_003027 | 150773 nt | Aug 13 2001 |
| Lymantria dispar nucleopolyhedrovirus                   |           | NC_001973 | 161046 nt | Nov 3 1998  |
| Lymphocystis disease virus - isolate China              |           | NC_005902 | 186250 nt | Jun 17 2004 |
| Lymphocystis disease virus 1                            |           | NC_001824 | 102653 nt | Mar 1 2002  |
| Lymphocytic choriomeningitis virus                      | L         | NC_004291 | 6680 nt   | May 18 1995 |
| Lymphocytic choriomeningitis virus                      | S         | NC_004294 | 3376 nt   | Aug 2 1993  |
| Macaca fuscata rhadinovirus                             |           | NC_007016 | 131217 nt | May 24 2005 |
| Machupo virus                                           | segment L | NC_005079 | 7196 nt   | Aug 30 2003 |
| Machupo virus                                           | segment S | NC_005078 | 3439 nt   | Aug 30 2003 |
| Macrobrachium rosenbergii nodavirus                     | RNA 1     | NC_005094 | 3202 nt   | Aug 30 2003 |
| Macrobrachium rosenbergii nodavirus                     | RNA 2     | NC_005095 | 1175 nt   | Aug 30 2003 |
| Macroptilium mosaic Puerto Rico virus                   | DNA A     | NC_004097 | 2615 nt   | Aug 1 2002  |
| Macroptilium mosaic Puerto Rico virus                   | DNA B     | NC_004098 | 2571 nt   | Aug 1 2002  |
| Macroptilium yellow mosaic Florida virus                | DNA A     | NC_004099 | 2642 nt   | Aug 1 2002  |
| Macroptilium yellow mosaic Florida virus                | DNA B     | NC_004100 | 2605 nt   | Aug 1 2002  |
| Macroptilium yellow mosaic virus                        |           | NC_004731 | 2630 nt   | Apr 17 2003 |
| Magnaporthe grisea virus 1                              |           | NC_006367 | 5359 nt   | Oct 13 2004 |
| Maize chlorotic dwarf virus                             |           | NC_003626 | 11832 nt  | Nov 15 2002 |
| Maize chlorotic mottle virus                            |           | NC_003627 | 4437 nt   | Jul 6 1989  |
| Maize dwarf mosaic virus                                |           | NC_003377 | 9515 nt   | Jan 12 2004 |
| Maize fine streak virus                                 |           | NC_005974 | 13782 nt  | Jul 12 2004 |
| Maize mosaic virus                                      |           | NC_005975 | 12133 nt  | Jul 12 2004 |

|                                                          |            |           |           |             |
|----------------------------------------------------------|------------|-----------|-----------|-------------|
| Maize necrotic streak virus                              |            | NC_007729 | 4094 nt   | Oct 5 2000  |
| Maize rayado fino virus                                  |            | NC_002786 | 6305 nt   | Nov 15 2002 |
| Maize streak virus                                       |            | NC_001346 | 2690 nt   | Jul 6 1989  |
| Malvastrum leaf curl virus                               |            | NC_007724 | 2745 nt   | Jan 23 2006 |
| Malvastrum leaf curl virus-associated DNA beta           |            | NC_007711 | 1354 nt   | Jan 7 2006  |
| Malvastrum leaf curl virus-associated defective DNA beta |            | NC_007725 | 895 nt    | Jan 16 2006 |
| Malvastrum yellow vein Yunnan virus                      |            | NC_006631 | 2747 nt   | Jan 8 2005  |
| Malvastrum yellow vein Yunnan virus-associated DNA beta  |            | NC_006632 | 1350 nt   | Jan 8 2005  |
| Malvastrum yellow vein virus                             |            | NC_004634 | 2731 nt   | Mar 25 2003 |
| Malvastrum yellow vein virus-associated DNA beta         |            | NC_004733 | 1348 nt   | Apr 17 2003 |
| Mamestra configurata NPV-A                               |            | NC_003529 | 155060 nt | Apr 5 2002  |
| Mamestra configurata nucleopolyhedrovirus B              |            | NC_004117 | 158482 nt | Mar 22 2005 |
| Mammalian orthoreovirus 1                                | segment L1 | NC_004271 | 3854 nt   | Jun 17 1994 |
| Mammalian orthoreovirus 1                                | segment L2 | NC_004259 | 3915 nt   | May 29 2001 |
| Mammalian orthoreovirus 1                                | segment L3 | NC_004255 | 3901 nt   | Jul 5 1999  |
| Mammalian orthoreovirus 1                                | segment M1 | NC_004261 | 2304 nt   | Apr 1 2002  |
| Mammalian orthoreovirus 1                                | segment M2 | NC_004262 | 2203 nt   | Dec 20 2003 |
| Mammalian orthoreovirus 1                                | segment M3 | NC_004257 | 2241 nt   | Nov 25 1999 |
| Mammalian orthoreovirus 1                                | segment S1 | NC_004267 | 1462 nt   | Aug 3 1993  |
| Mammalian orthoreovirus 1                                | segment S2 | NC_004268 | 1331 nt   | Aug 3 1993  |
| Mammalian orthoreovirus 1                                | segment S3 | NC_004266 | 1198 nt   | Aug 3 1993  |
| Mammalian orthoreovirus 1                                | segment S4 | NC_004265 | 1196 nt   | Aug 3 1993  |
| Mammalian orthoreovirus 2                                | segment L1 | NC_004272 | 3854 nt   | Jun 17 1994 |
| Mammalian orthoreovirus 2                                | segment L2 | NC_004260 | 3912 nt   | May 29 2001 |
| Mammalian orthoreovirus 2                                | segment L3 | NC_004256 | 3901 nt   | Jul 5 1999  |
| Mammalian orthoreovirus 2                                | segment M1 | NC_004254 | 2297 nt   | May 19 2001 |
| Mammalian orthoreovirus 2                                | segment M2 | NC_004270 | 2203 nt   | Aug 3 1993  |
| Mammalian orthoreovirus 2                                | segment M3 | NC_004258 | 2240 nt   | Nov 25 1999 |
| Mammalian orthoreovirus 2                                | segment S1 | NC_004264 | 1442 nt   | May 18 1995 |
| Mammalian orthoreovirus 2                                | segment S2 | NC_004263 | 1331 nt   | Jul 26 1993 |
| Mammalian orthoreovirus 2                                | segment S3 | NC_004269 | 1198 nt   | Aug 3       |

|                                       |            |           |           |             |
|---------------------------------------|------------|-----------|-----------|-------------|
|                                       |            |           |           | 1993        |
| Mammalian orthoreovirus 2             | segment S4 | NC_004273 | 1196 nt   | Feb 25 1992 |
| Mammalian orthoreovirus 3             | segment L1 | NC_004282 | 3854 nt   | Jun 17 1994 |
| Mammalian orthoreovirus 3             | segment L2 | NC_004275 | 3916 nt   | Aug 3 1993  |
| Mammalian orthoreovirus 3             | segment L3 | NC_004274 | 3901 nt   | Jul 5 1999  |
| Mammalian orthoreovirus 3             | segment M1 | NC_004280 | 2304 nt   | Aug 3 1993  |
| Mammalian orthoreovirus 3             | segment M2 | NC_004278 | 2207 nt   | Dec 20 2003 |
| Mammalian orthoreovirus 3             | segment M3 | NC_004281 | 2235 nt   | Aug 3 1993  |
| Mammalian orthoreovirus 3             | segment S1 | NC_004277 | 1416 nt   | Aug 3 1993  |
| Mammalian orthoreovirus 3             | segment S2 | NC_004279 | 1331 nt   | Aug 3 1993  |
| Mammalian orthoreovirus 3             | segment S3 | NC_004283 | 1198 nt   | Nov 7 1985  |
| Mammalian orthoreovirus 3             | segment S4 | NC_004276 | 1196 nt   | Aug 3 1993  |
| Marine birnavirus                     | segment A  | NC_004168 | 2976 nt   | Sep 3 1997  |
| Marine birnavirus                     | segment B  | NC_004176 | 2735 nt   | Sep 9 2002  |
| Mason-Pfizer monkey virus             |            | NC_001550 | 8557 nt   | Dec 18 2003 |
| Mayaro virus                          |            | NC_003417 | 11411 nt  | Nov 19 2002 |
| Measles virus                         |            | NC_001498 | 15894 nt  | Dec 9 1998  |
| Melanoplus sanguinipes entomopoxvirus |            | NC_001993 | 236120 nt | Dec 23 1998 |
| Meleagrid herpesvirus 1               |            | NC_002641 | 159160 nt | Mar 7 2002  |
| Melon chlorotic leaf curl virus       |            | NC_004732 | 2662 nt   | Apr 17 2003 |
| Melon necrotic spot virus             |            | NC_001504 | 4266 nt   | Aug 2 1993  |
| Menangle virus                        |            | NC_007620 | 15516 nt  | Nov 28 2005 |
| Mice minute virus                     |            | NC_001510 | 5149 nt   | Aug 2 1993  |
| Microplitis demolitor bracovirus      | A          | NC_007028 | 3611 nt   | Dec 25 2004 |
| Microplitis demolitor bracovirus      | B          | NC_007029 | 6307 nt   | Dec 27 2004 |
| Microplitis demolitor bracovirus      | C          | NC_007031 | 7228 nt   | Jan 17 2005 |
| Microplitis demolitor bracovirus      | D          | NC_007033 | 7823 nt   | Jan 17 2005 |
| Microplitis demolitor bracovirus      | E          | NC_007030 | 8443 nt   | Jan 17 2005 |
| Microplitis demolitor bracovirus      | F          | NC_007032 | 9604 nt   | Jan 17 2005 |
| Microplitis demolitor bracovirus      | G          | NC_007034 | 10790 nt  | Jan 17 2005 |



|                                  |        |           |          |             |
|----------------------------------|--------|-----------|----------|-------------|
| Microplitis demolitor bracovirus | H      | NC_007035 | 11238 nt | Jan 17 2005 |
| Microplitis demolitor bracovirus | I      | NC_007041 | 13279 nt | Feb 7 2005  |
| Microplitis demolitor bracovirus | J      | NC_007036 | 13704 nt | Jan 17 2005 |
| Microplitis demolitor bracovirus | K      | NC_007037 | 15058 nt | Jan 17 2005 |
| Microplitis demolitor bracovirus | L      | NC_007040 | 15096 nt | Jan 17 2005 |
| Microplitis demolitor bracovirus | M      | NC_007038 | 15218 nt | Jan 17 2005 |
| Microplitis demolitor bracovirus | N      | NC_007039 | 17355 nt | Jan 17 2005 |
| Microplitis demolitor bracovirus | O      | NC_007044 | 34334 nt | May 24 2005 |
| Milk vetch dwarf virus           | DNA 1  | NC_003638 | 1007 nt  | Oct 27 1998 |
| Milk vetch dwarf virus           | DNA 2  | NC_003639 | 1009 nt  | Oct 27 1998 |
| Milk vetch dwarf virus           | DNA 3  | NC_003640 | 1000 nt  | Oct 27 1998 |
| Milk vetch dwarf virus           | DNA 4  | NC_003641 | 990 nt   | Oct 27 1998 |
| Milk vetch dwarf virus           | DNA 5  | NC_003642 | 989 nt   | Oct 27 1998 |
| Milk vetch dwarf virus           | DNA 6  | NC_003643 | 977 nt   | Oct 27 1998 |
| Milk vetch dwarf virus           | DNA 7  | NC_003644 | 981 nt   | Oct 27 1998 |
| Milk vetch dwarf virus           | DNA 8  | NC_003645 | 985 nt   | Oct 27 1998 |
| Milk vetch dwarf virus           | DNA 9  | NC_003646 | 997 nt   | Oct 27 1998 |
| Milk vetch dwarf virus           | DNA 10 | NC_003647 | 1022 nt  | Oct 27 1998 |
| Milk vetch dwarf virus           | DNA 11 | NC_003648 | 1001 nt  | Jul 4 2000  |
| Mink astrovirus                  |        | NC_004579 | 6610 nt  | Jun 10 2003 |
| Mint virus 1                     |        | NC_006944 | 15450 nt | Jan 25 2005 |
| Mint virus X                     |        | NC_006948 | 5914 nt  | Feb 1 2005  |
| Mirabilis mosaic virus           |        | NC_004036 | 7857 nt  | Jun 14 2002 |
| Mirafiori lettuce virus          | RNA 1  | NC_004779 | 7794 nt  | May 7 2003  |
| Mirafiori lettuce virus          | RNA 2  | NC_004781 | 1788 nt  | May 7 2003  |
| Mirafiori lettuce virus          | RNA 3  | NC_004782 | 1515 nt  | May 7 2003  |
| Mirafiori lettuce virus          | RNA 4  | NC_004780 | 1402 nt  | May 7 2003  |
| Miscanthus streak virus          |        | NC_003379 | 2672 nt  | Apr 29 1993 |
| Mobala virus                     |        | NC_007903 | 3380 nt  | Mar 6 2006  |
| Mobala virus                     |        | NC_007904 | 7325 nt  | Mar 16      |

|                                        |           |           |           |             |
|----------------------------------------|-----------|-----------|-----------|-------------|
|                                        |           |           |           | 2006        |
| Modoc virus                            |           | NC_003635 | 10600 nt  | Jan 13 2003 |
| Mokola virus                           |           | NC_006429 | 11940 nt  | Nov 17 2004 |
| Molluscum contagiosum virus            |           | NC_001731 | 190289 nt | Aug 15 1996 |
| Moloney murine sarcoma virus           |           | NC_001502 | 5833 nt   | Jan 11 2004 |
| Monkeypox virus                        |           | NC_003310 | 196858 nt | Dec 12 2001 |
| Montana myotis leukoencephalitis virus |           | NC_004119 | 10690 nt  | Jan 13 2003 |
| Mopeia Lassa reassortant 29            | segment L | NC_006572 | 7271 nt   | Dec 17 2004 |
| Mopeia Lassa reassortant 29            | segment S | NC_006573 | 3402 nt   | Dec 17 2004 |
| Mopeia virus AN20410                   | segment L | NC_006574 | 7271 nt   | Dec 17 2004 |
| Mopeia virus AN20410                   | segment S | NC_006575 | 3427 nt   | Dec 17 2004 |
| Mossman virus                          |           | NC_005339 | 16650 nt  | Jan 21 2004 |
| Mouse mammary tumor virus              |           | NC_001503 | 8805 nt   | Jan 12 2004 |
| Mouse parvovirus 1                     |           | NC_001630 | 5144 nt   | Aug 6 1994  |
| Mulard duck circovirus                 |           | NC_005053 | 1996 nt   | Jul 31 2003 |
| Mule deer poxvirus                     |           | NC_006966 | 166259 nt | Apr 15 2005 |
| Multimammate rat papillomavirus        |           | NC_001605 | 7687 nt   | Jan 24 1995 |
| Mumps virus                            |           | NC_002200 | 15384 nt  | Apr 11 2000 |
| Mungbean yellow mosaic India virus     | DNA A     | NC_004608 | 2745 nt   | Mar 12 2003 |
| Mungbean yellow mosaic India virus     | DNA B     | NC_004609 | 2616 nt   | Mar 12 2003 |
| Mungbean yellow mosaic virus           | DNA A     | NC_001983 | 2723 nt   | Mar 2 2001  |
| Mungbean yellow mosaic virus           | DNA B     | NC_001984 | 2675 nt   | Apr 26 2002 |
| Murid herpesvirus 1                    |           | NC_004065 | 230278 nt | Mar 21 2005 |
| Murid herpesvirus 2                    |           | NC_002512 | 230138 nt | Aug 14 2000 |
| Murid herpesvirus 4                    |           | NC_001826 | 119450 nt | Aug 12 1997 |
| Murine adenovirus A                    |           | NC_000942 | 30944 nt  | Mar 7 2002  |
| Murine hepatitis virus strain A59      |           | NC_001846 | 31357 nt  | Feb 23 2005 |
| Murine hepatitis virus strain JHM      |           | NC_006852 | 31526 nt  | Feb 23 2005 |
| Murine leukemia virus                  |           | NC_001501 | 8332 nt   | Jan 12 2004 |

|                                  |       |           |           |                |
|----------------------------------|-------|-----------|-----------|----------------|
| Murine osteosarcoma virus        |       | NC_001506 | 3811 nt   | Jan 21<br>1998 |
| Murine pneumotropic virus        |       | NC_001505 | 4754 nt   | Aug 2<br>1993  |
| Murine polyomavirus              |       | NC_001515 | 5297 nt   | Aug 2<br>1993  |
| Murine sarcoma virus             |       | NC_001363 | 5833 nt   | Nov 3<br>1982  |
| Murine type C retrovirus         |       | NC_001702 | 8135 nt   | Dec 12<br>1995 |
| Murray Valley encephalitis virus |       | NC_000943 | 11014 nt  | Oct 29<br>2002 |
| Muscovy duck circovirus          |       | NC_006561 | 1988 nt   | Dec 17<br>2004 |
| Muscovy duck parvovirus          |       | NC_006147 | 5132 nt   | Aug 30<br>2004 |
| Mushroom bacilliform virus       |       | NC_001633 | 4009 nt   | Nov 10<br>1994 |
| Mycoreovirus 3                   | 1     | NC_007535 | 4143 nt   | Nov 4<br>2005  |
| Mycoreovirus 3                   | 10    | NC_007529 | 1171 nt   | Aug 14<br>2002 |
| Mycoreovirus 3                   | 11    | NC_007531 | 1003 nt   | Aug 14<br>2002 |
| Mycoreovirus 3                   | 12    | NC_007532 | 943 nt    | Aug 14<br>2002 |
| Mycoreovirus 3                   | 2     | NC_007533 | 3773 nt   | Nov 4<br>2005  |
| Mycoreovirus 3                   | 3     | NC_007536 | 3310 nt   | Nov 4<br>2005  |
| Mycoreovirus 3                   | 4     | NC_007524 | 2259 nt   | Aug 14<br>2002 |
| Mycoreovirus 3                   | 5     | NC_007534 | 2089 nt   | Nov 4<br>2005  |
| Mycoreovirus 3                   | 6     | NC_007525 | 2030 nt   | Aug 14<br>2002 |
| Mycoreovirus 3                   | 7     | NC_007526 | 1509 nt   | Aug 14<br>2002 |
| Mycoreovirus 3                   | 8     | NC_007527 | 1299 nt   | Aug 14<br>2002 |
| Mycoreovirus 3                   | 9     | NC_007528 | 1226 nt   | Aug 14<br>2002 |
| Mycovirus FusoV                  | RNA 1 | NC_003885 | 1645 nt   | Jul 7 1995     |
| Mycovirus FusoV                  | RNA 2 | NC_003886 | 1445 nt   | Jul 7 1995     |
| Mythimna loreyi densovirus       |       | NC_005341 | 6034 nt   | Dec 16<br>2003 |
| Myxoma virus                     |       | NC_001132 | 161773 nt | Dec 4<br>1999  |
| Myzus persicae densovirus        |       | NC_005040 | 5499 nt   | Jul 25<br>2003 |
| Nanovirus-like particle          |       | NC_005954 | 1377 nt   | Jun 30<br>2004 |
| Narcissus mosaic virus           |       | NC_001441 | 6955 nt   | Apr 29<br>1993 |
| Neodiprion lecontei NPV          |       | NC_005906 | 81755 nt  | Jun 15<br>2004 |

|                                          |            |           |          |                |
|------------------------------------------|------------|-----------|----------|----------------|
| Neodiprion sertifer nucleopolyhedrovirus |            | NC_005905 | 86462 nt | Jun 17<br>2004 |
| Nerine virus X                           |            | NC_007679 | 6582 nt  | Dec 21<br>2005 |
| Newbury agent 1                          |            | NC_007916 | 7454 nt  | Mar 6<br>2006  |
| Newcastle disease virus                  |            | NC_002617 | 15186 nt | Dec 2<br>2000  |
| Nilaparvata lugens reovirus              | segment 1  | NC_003654 | 4391 nt  | Mar 25<br>1995 |
| Nilaparvata lugens reovirus              | segment 2  | NC_003655 | 3732 nt  | Mar 25<br>1995 |
| Nilaparvata lugens reovirus              | segment 3  | NC_003656 | 3753 nt  | Mar 25<br>1995 |
| Nilaparvata lugens reovirus              | segment 4  | NC_003657 | 3560 nt  | Mar 25<br>1995 |
| Nilaparvata lugens reovirus              | segment 5  | NC_003658 | 3427 nt  | Mar 25<br>1995 |
| Nilaparvata lugens reovirus              | segment 6  | NC_003659 | 2970 nt  | Mar 25<br>1995 |
| Nilaparvata lugens reovirus              | segment 7  | NC_003660 | 1994 nt  | Mar 25<br>1995 |
| Nilaparvata lugens reovirus              | segment 8  | NC_003653 | 1802 nt  | Nov 13<br>1995 |
| Nilaparvata lugens reovirus              | segment 9  | NC_003661 | 1640 nt  | Mar 25<br>1995 |
| Nilaparvata lugens reovirus              | segment 10 | NC_003652 | 1430 nt  | Sep 21<br>1994 |
| Nipah virus                              |            | NC_002728 | 18246 nt | Apr 3<br>2001  |
| Nodamura virus                           | RNA 1      | NC_002690 | 3204 nt  | Aug 8<br>2000  |
| Nodamura virus                           | RNA 2      | NC_002691 | 1336 nt  | Oct 29<br>2003 |
| Nora virus                               |            | NC_007919 | 11911 nt | Mar 6<br>2006  |
| Northern cereal mosaic virus             |            | NC_002251 | 13222 nt | Mar 11<br>2002 |
| Norwalk virus                            |            | NC_001959 | 7654 nt  | Feb 19<br>2003 |
| Nudaurelia capensis beta virus           |            | NC_001990 | 6625 nt  | Dec 17<br>1998 |
| O'nyong-nyong virus                      |            | NC_001512 | 11835 nt | Nov 19<br>2002 |
| Oat blue dwarf virus                     |            | NC_001793 | 6509 nt  | Nov 15<br>2002 |
| Oat chlorotic stunt virus                |            | NC_003633 | 4114 nt  | Oct 24<br>1995 |
| Oat golden stripe virus                  | RNA 1      | NC_002358 | 7111 nt  | Jun 15<br>2000 |
| Oat golden stripe virus                  | RNA 2      | NC_002357 | 3232 nt  | Oct 8 1999     |
| Oat mosaic virus                         | RNA 1      | NC_004016 | 7550 nt  | Nov 15<br>2002 |
| Oat mosaic virus                         | RNA 2      | NC_004017 | 2284 nt  | Nov 15<br>2002 |
| Oat necrotic mottle virus                |            | NC_005136 | 9346 nt  | Nov 13<br>2003 |

|                                              |       |           |           |                |
|----------------------------------------------|-------|-----------|-----------|----------------|
| Obuda pepper virus                           |       | NC_003852 | 6507 nt   | Dec 23<br>1993 |
| Odontoglossum ringspot virus                 |       | NC_001728 | 6618 nt   | Oct 13<br>1994 |
| Okra leaf curl virus-associated sequences    |       | NC_004093 | 1305 nt   | Aug 2<br>2002  |
| Okra yellow vein disease associated sequence |       | NC_005051 | 1307 nt   | Jul 29<br>2003 |
| Okra yellow vein mosaic virus                |       | NC_004673 | 2739 nt   | Apr 3<br>2003  |
| Olive latent virus 1                         |       | NC_001721 | 3699 nt   | May 17<br>1996 |
| Olive latent virus 2                         | RNA 1 | NC_003673 | 3128 nt   | Jan 5 1996     |
| Olive latent virus 2                         | RNA 2 | NC_003674 | 2735 nt   | Jan 5 1996     |
| Olive latent virus 2                         | RNA 3 | NC_003671 | 2438 nt   | Feb 24<br>1994 |
| Olive mild mosaic virus                      |       | NC_006939 | 3683 nt   | Mar 30<br>2005 |
| Omsk hemorrhagic fever virus                 |       | NC_005062 | 10787 nt  | Oct 7 2003     |
| Onion yellow dwarf virus                     |       | NC_005029 | 10538 nt  | Jul 10<br>2003 |
| Ononis yellow mosaic virus                   |       | NC_001513 | 6211 nt   | Aug 2<br>1993  |
| Operophtera brumata reovirus                 | 1     | NC_007559 | 4170 nt   | Oct 29<br>2005 |
| Operophtera brumata reovirus                 | 10    | NC_007568 | 1509 nt   | Oct 29<br>2005 |
| Operophtera brumata reovirus                 | 2     | NC_007560 | 3780 nt   | Oct 29<br>2005 |
| Operophtera brumata reovirus                 | 3     | NC_007561 | 3595 nt   | Oct 29<br>2005 |
| Operophtera brumata reovirus                 | 4     | NC_007562 | 3362 nt   | Oct 29<br>2005 |
| Operophtera brumata reovirus                 | 5     | NC_007563 | 2106 nt   | Nov 2<br>2005  |
| Operophtera brumata reovirus                 | 6     | NC_007564 | 1935 nt   | Oct 29<br>2005 |
| Operophtera brumata reovirus                 | 7     | NC_007565 | 1606 nt   | Oct 29<br>2005 |
| Operophtera brumata reovirus                 | 8     | NC_007566 | 1584 nt   | Oct 29<br>2005 |
| Operophtera brumata reovirus                 | 9     | NC_007567 | 1547 nt   | Oct 29<br>2005 |
| Ophiostoma mitovirus 3a                      |       | NC_004049 | 2617 nt   | Sep 24<br>1998 |
| Ophiostoma mitovirus 6                       |       | NC_004054 | 2343 nt   | May 10<br>1999 |
| Ophiostoma novo-ulmi mitovirus 4-Ld          |       | NC_004052 | 2599 nt   | May 10<br>1999 |
| Ophiostoma novo-ulmi mitovirus 5-Ld          |       | NC_004053 | 2474 nt   | May 10<br>1999 |
| Opuntia virus X                              |       | NC_006060 | 6653 nt   | Jul 21<br>2004 |
| Orf virus                                    |       | NC_005336 | 139962 nt | Jan 21<br>2004 |
| Orgyia pseudotsugata multicapsid             |       | NC_001875 | 131995 nt | Mar 27         |

|                                      |            |           |           |             |
|--------------------------------------|------------|-----------|-----------|-------------|
| nucleopolyhedrovirus                 |            |           |           | 1997        |
| Oropouche virus                      | segment L  | NC_005776 | 6846 nt   | Mar 4 2004  |
| Oropouche virus                      | segment M  | NC_005775 | 4385 nt   | Mar 4 2004  |
| Oropouche virus                      | segment S  | NC_005777 | 754 nt    | Mar 4 2004  |
| Oryza rufipogon endornavirus         |            | NC_007649 | 13936 nt  | Dec 16 2005 |
| Oryza sativa endornavirus            |            | NC_007647 | 13952 nt  | Oct 20 1995 |
| Ostreid herpesvirus 1                |            | NC_005881 | 207439 nt | Feb 2 2004  |
| Ovine adenovirus A                   |            | NC_002513 | 33034 nt  | Mar 11 2002 |
| Ovine adenovirus D                   |            | NC_004037 | 29574 nt  | Jan 13 2004 |
| Ovine astrovirus                     |            | NC_002469 | 6440 nt   | Dec 19 1997 |
| Ovine enzootic nasal tumour virus    |            | NC_007015 | 7434 nt   | Apr 24 1999 |
| Ovine herpesvirus 2                  |            | NC_007646 | 135135 nt | Nov 26 2005 |
| Ovine lentivirus                     |            | NC_001511 | 9256 nt   | Apr 3 2006  |
| Ovine papillomavirus - 1             |            | NC_001789 | 7761 nt   | Feb 2 1997  |
| Ovine pulmonary adenocarcinoma virus |            | NC_001494 | 7462 nt   | Aug 2 1993  |
| Oyster mushroom spherical virus      |            | NC_004560 | 5784 nt   | Feb 6 2003  |
| Palyam virus                         | segment 3  | NC_005989 | 2774 nt   | Jul 13 2004 |
| Palyam virus                         | segment 1  | NC_005990 | 3930 nt   | Jul 13 2004 |
| Palyam virus                         | segment 2  | NC_005986 | 3055 nt   | Jul 13 2004 |
| Palyam virus                         | segment 4  | NC_005991 | 1967 nt   | Jul 13 2004 |
| Palyam virus                         | segment 5  | NC_005993 | 1764 nt   | Jul 13 2004 |
| Palyam virus                         | segment 6  | NC_005987 | 1610 nt   | Jul 13 2004 |
| Palyam virus                         | segment 7  | NC_005988 | 1151 nt   | Jul 13 2004 |
| Palyam virus                         | segment 8  | NC_005994 | 1059 nt   | Jul 13 2004 |
| Palyam virus                         | segment 9  | NC_005992 | 877 nt    | Jul 13 2004 |
| Palyam virus                         | segment 10 | NC_005995 | 728 nt    | Jul 13 2004 |
| Panicum mosaic satellite virus       |            | NC_003847 | 826 nt    | May 18 1995 |
| Panicum mosaic virus                 |            | NC_002598 | 4326 nt   | Jan 14 1997 |
| Panicum streak virus                 |            | NC_001647 | 2705 nt   | Dec 18 2003 |
| Papaya leaf curl China virus         |            | NC_005321 | 2751 nt   | Jan 13 2004 |

|                                            |       |           |           |             |
|--------------------------------------------|-------|-----------|-----------|-------------|
| Papaya leaf curl Guandong virus            |       | NC_005844 | 2742 nt   | Apr 13 2004 |
| Papaya leaf curl virus                     |       | NC_004147 | 2746 nt   | Jan 28 1998 |
| Papaya leaf curl virus-associated DNA beta |       | NC_004706 | 1372 nt   | Apr 10 2003 |
| Papaya leaf-distortion mosaic potyvirus    |       | NC_005028 | 10155 nt  | Jul 10 2003 |
| Papaya mosaic virus                        |       | NC_001748 | 6656 nt   | Apr 29 1993 |
| Papaya ringspot virus                      |       | NC_001785 | 10326 nt  | Nov 15 2002 |
| Paprika mild mottle virus                  |       | NC_004106 | 6524 nt   | Aug 8 2002  |
| Paramecium bursaria Chlorella virus 1      |       | NC_000852 | 330743 nt | Feb 6 1996  |
| Pariacoto virus                            | RNA 1 | NC_003691 | 3011 nt   | May 24 2000 |
| Pariacoto virus                            | RNA 2 | NC_003692 | 1311 nt   | Nov 19 2002 |
| Parietaria mottle virus                    | RNA 1 | NC_005848 | 3518 nt   | Apr 15 2004 |
| Parietaria mottle virus                    | RNA 2 | NC_005849 | 2922 nt   | Apr 15 2004 |
| Parietaria mottle virus                    | RNA 3 | NC_005854 | 2268 nt   | Apr 15 2004 |
| Parsnip yellow fleck virus                 |       | NC_003628 | 9871 nt   | Nov 15 2002 |
| Parvovirus H1                              |       | NC_001358 | 5176 nt   | Jul 2 1986  |
| Patchouli mild mosaic virus                | RNA 1 | NC_003975 | 5956 nt   | Nov 15 2002 |
| Patchouli mild mosaic virus                | RNA 2 | NC_003974 | 3591 nt   | Nov 15 2002 |
| Pea early browning virus                   | RNA 1 | NC_002036 | 7073 nt   | Mar 21 1989 |
| Pea early browning virus                   | RNA 2 | NC_001368 | 3374 nt   | Mar 26 1990 |
| Pea enation mosaic virus satellite RNA     |       | NC_003854 | 717 nt    | Mar 7 1994  |
| Pea enation mosaic virus-1                 |       | NC_003629 | 5706 nt   | Jun 12 1993 |
| Pea enation mosaic virus-2                 |       | NC_003853 | 4253 nt   | Mar 7 1994  |
| Pea seed-borne mosaic virus                |       | NC_001671 | 9924 nt   | Nov 15 2002 |
| Pea stem necrosis virus                    |       | NC_004995 | 4048 nt   | Jul 8 2003  |
| Peanut chlorotic streak virus              |       | NC_001634 | 8174 nt   | Oct 8 1994  |
| Peanut clump virus                         | RNA 1 | NC_003672 | 5897 nt   | Nov 1 1994  |
| Peanut clump virus                         | RNA 2 | NC_003668 | 4504 nt   | Apr 6 1994  |
| Peanut mottle virus                        |       | NC_002600 | 9709 nt   | Nov 15 2002 |
| Peanut stunt virus                         | RNA 1 | NC_002038 | 3357 nt   | May 12 1995 |
| Peanut stunt virus                         | RNA 2 | NC_002039 | 2947 nt   | Oct 22 2004 |

|                                             |           |           |         |             |
|---------------------------------------------|-----------|-----------|---------|-------------|
| Peanut stunt virus                          | RNA 3     | NC_002040 | 2188 nt | May 12 1995 |
| Peanut stunt virus satellite RNA            |           | NC_003855 | 393 nt  | Jul 28 1997 |
| Pear latent virus                           |           | NC_004723 | 4766 nt | Apr 17 2003 |
| Pelargonium chlorotic ring pattern virus    |           | NC_005985 | 3904 nt | Jul 13 2004 |
| Pelargonium flower break virus              |           | NC_005286 | 3923 nt | Dec 6 2003  |
| Pelargonium line pattern virus              |           | NC_007017 | 3884 nt | May 24 2005 |
| Pelargonium necrotic spot virus             |           | NC_005285 | 4744 nt | Dec 5 2003  |
| Pelargonium zonate spot virus               | RNA 1     | NC_003649 | 3383 nt | Sep 16 2000 |
| Pelargonium zonate spot virus               | RNA 2     | NC_003650 | 2435 nt | Sep 16 2000 |
| Pelargonium zonate spot virus               | RNA 3     | NC_003651 | 2659 nt | Sep 16 2000 |
| Penaeid shrimp infectious myonecrosis virus |           | NC_007915 | 7560 nt | Mar 13 2006 |
| Penicillium chrysogenum virus               | 1         | NC_007539 | 3562 nt | Aug 20 2002 |
| Penicillium chrysogenum virus               | 2         | NC_007540 | 3200 nt | Aug 20 2002 |
| Penicillium chrysogenum virus               | 3         | NC_007541 | 2976 nt | Aug 20 2002 |
| Penicillium chrysogenum virus               | 4         | NC_007542 | 2902 nt | Aug 20 2002 |
| Penicillium stoloniferum virus F            | 1         | NC_007221 | 1677 nt | Jul 20 2005 |
| Penicillium stoloniferum virus F            | 2         | NC_007222 | 1500 nt | Jul 20 2005 |
| Penicillium stoloniferum virus F            | 3         | NC_007223 | 677 nt  | Jul 20 2005 |
| Penicillium stoloniferum virus S            | segment 1 | NC_005976 | 1690 nt | Jul 10 2004 |
| Penicillium stoloniferum virus S            | segment 2 | NC_005977 | 1523 nt | Jul 10 2004 |
| Pennisetum mosaic virus                     |           | NC_007147 | 9611 nt | Jun 1 2005  |
| Pepino mosaic virus                         |           | NC_004067 | 6450 nt | Jul 8 2002  |
| Pepper golden mosaic virus                  | DNA A     | NC_004101 | 2613 nt | Jun 12 1996 |
| Pepper golden mosaic virus                  | DNA B     | NC_004096 | 2595 nt | Apr 25 2002 |
| Pepper huasteco yellow vein virus           | DNA A     | NC_001359 | 2631 nt | Feb 17 1993 |
| Pepper huasteco yellow vein virus           | DNA B     | NC_001369 | 2589 nt | Feb 17 1993 |
| Pepper leaf curl Bangladesh virus           |           | NC_004192 | 2753 nt | Feb 11 2001 |
| Pepper leaf curl virus                      |           | NC_000882 | 2744 nt | Oct 14 1999 |
| Pepper mild mottle virus                    |           | NC_003630 | 6357 nt | Aug 3 1993  |



|                                                            |                   |           |           |             |
|------------------------------------------------------------|-------------------|-----------|-----------|-------------|
| Pepper mottle virus                                        |                   | NC_001517 | 9640 nt   | Nov 15 2002 |
| Pepper ringspot virus                                      | RNA 1             | NC_003669 | 6828 nt   | Sep 8 1993  |
| Pepper ringspot virus                                      | RNA 2             | NC_003670 | 1799 nt   | Jul 2 1986  |
| Pepper yellow vein Mali virus                              |                   | NC_005347 | 2786 nt   | Jan 21 2004 |
| Perina nuda picorna-like virus                             |                   | NC_003113 | 9476 nt   | Sep 22 2001 |
| Periplaneta fuliginosa densovirus                          |                   | NC_000936 | 5454 nt   | Mar 7 2002  |
| Peru tomato mosaic virus                                   |                   | NC_004573 | 9899 nt   | Jan 13 2004 |
| Peruvian horse sickness virus                              | 1                 | NC_007748 | 3987 nt   | Dec 31 2005 |
| Peruvian horse sickness virus                              | 10                | NC_007757 | 819 nt    | Dec 31 2005 |
| Peruvian horse sickness virus                              | 2                 | NC_007749 | 2856 nt   | Dec 31 2005 |
| Peruvian horse sickness virus                              | 3                 | NC_007750 | 2747 nt   | Dec 31 2005 |
| Peruvian horse sickness virus                              | 4                 | NC_007751 | 1996 nt   | Dec 31 2005 |
| Peruvian horse sickness virus                              | 5                 | NC_007755 | 1784 nt   | Dec 31 2005 |
| Peruvian horse sickness virus                              | 6                 | NC_007752 | 1695 nt   | Dec 31 2005 |
| Peruvian horse sickness virus                              | 7                 | NC_007756 | 1613 nt   | Dec 31 2005 |
| Peruvian horse sickness virus                              | 8                 | NC_007754 | 1180 nt   | Dec 31 2005 |
| Peruvian horse sickness virus                              | 9                 | NC_007753 | 1071 nt   | Dec 31 2005 |
| Peste-des-petits-ruminants virus                           |                   | NC_006383 | 15948 nt  | Oct 15 2004 |
| Pestivirus Giraffe-1                                       |                   | NC_003678 | 12602 nt  | Jan 24 2003 |
| Pestivirus Reindeer-1                                      |                   | NC_003677 | 12318 nt  | Jan 24 2003 |
| Petunia vein clearing virus                                |                   | NC_001839 | 7206 nt   | Jun 28 2001 |
| Phocoena spinipinnis papillomavirus                        |                   | NC_003348 | 7879 nt   | Jan 4 2002  |
| Phthorimaea operculella granulovirus                       |                   | NC_004062 | 119217 nt | Jul 1 2002  |
| Physalis mottle virus                                      |                   | NC_003634 | 6673 nt   | Aug 1 1998  |
| Phytophthora endornavirus 1                                |                   | NC_007069 | 13883 nt  | May 23 2005 |
| Pichinde virus                                             | segment L         | NC_006439 | 6997 nt   | Oct 18 2001 |
| Pichinde virus                                             | segment S         | NC_006447 | 3419 nt   | Nov 13 2004 |
| Pirital virus                                              | segment L         | NC_005897 | 7089 nt   | Jun 14 2004 |
| Pirital virus                                              | segment S         | NC_005894 | 3393 nt   | Jun 14 2004 |
| Planaria asexual strain-specific virus-like element type 1 | large DNA segment | NC_003220 | 5699 nt   | May 16 2001 |

|                                                            |                   |           |           |             |
|------------------------------------------------------------|-------------------|-----------|-----------|-------------|
| Planaria asexual strain-specific virus-like element type 1 | small DNA segment | NC_003219 | 1911 nt   | May 16 2001 |
| Planococcus citri densovirus                               |                   | NC_004289 | 5380 nt   | Jan 16 2002 |
| Plantago asiatica mosaic virus                             |                   | NC_003849 | 6128 nt   | Jun 1 1993  |
| Plautia stali intestine virus                              |                   | NC_003779 | 8797 nt   | Sep 6 1997  |
| Pleurotus ostreatus virus                                  | RNA1              | NC_006961 | 2296 nt   | Feb 1 2005  |
| Pleurotus ostreatus virus                                  | RNA2              | NC_006960 | 2223 nt   | Mar 26 2005 |
| Plum pox virus                                             |                   | NC_001445 | 9741 nt   | Nov 15 2002 |
| Plutella xylostella granulovirus                           |                   | NC_002593 | 100999 nt | Oct 29 2000 |
| Pneumonia virus of mice J3666                              |                   | NC_006579 | 14885 nt  | Dec 30 2004 |
| Poinsettia mosaic virus                                    |                   | NC_002164 | 6099 nt   | Nov 15 2002 |
| Poliovirus                                                 |                   | NC_002058 | 7440 nt   | Nov 19 2002 |
| Poplar mosaic virus                                        |                   | NC_005343 | 8741 nt   | Jan 21 2004 |
| Porcine adenovirus A                                       |                   | NC_005869 | 34094 nt  | Apr 29 2004 |
| Porcine adenovirus C                                       |                   | NC_002702 | 32621 nt  | Mar 11 2002 |
| Porcine circovirus                                         |                   | NC_001792 | 1758 nt   | Sep 9 1998  |
| Porcine circovirus 1                                       |                   | NC_006266 | 1759 nt   | Sep 9 2004  |
| Porcine circovirus 2                                       |                   | NC_005148 | 1768 nt   | Oct 29 2003 |
| Porcine endogenous retrovirus                              |                   | NC_003059 | 8072 nt   | Aug 12 2001 |
| Porcine enteric calicivirus                                |                   | NC_000940 | 7320 nt   | Oct 31 1999 |
| Porcine enterovirus A                                      |                   | NC_003987 | 7491 nt   | Nov 19 2002 |
| Porcine enterovirus B                                      |                   | NC_004441 | 7388 nt   | Dec 19 2002 |
| Porcine epidemic diarrhea virus                            |                   | NC_003436 | 28033 nt  | Apr 25 2003 |
| Porcine hemagglutinating encephalomyelitis virus           |                   | NC_007732 | 30480 nt  | Dec 31 2005 |
| Porcine parvovirus                                         |                   | NC_001718 | 5075 nt   | Dec 10 2002 |
| Porcine respiratory and reproductive syndrome virus        |                   | NC_001961 | 15428 nt  | Nov 19 2002 |
| Porcine teschovirus                                        |                   | NC_003985 | 7117 nt   | Nov 19 2002 |
| Potato aucuba mosaic virus                                 |                   | NC_003632 | 7059 nt   | Mar 2 1995  |
| Potato leafroll virus                                      |                   | NC_001747 | 5987 nt   | May 25 1992 |
| Potato mop-top virus                                       | RNA 1             | NC_003723 | 6043 nt   | Oct 15 1999 |
| Potato mop-top virus                                       | RNA 2             | NC_003725 | 2964 nt   | May 11 2000 |

|                                           |           |           |           |             |
|-------------------------------------------|-----------|-----------|-----------|-------------|
| Potato mop-top virus                      | RNA 3     | NC_003724 | 3134 nt   | Apr 4 2000  |
| Potato virus A                            |           | NC_004039 | 9585 nt   | Nov 15 2002 |
| Potato virus M                            |           | NC_001361 | 8533 nt   | Jan 12 2004 |
| Potato virus S                            |           | NC_007289 | 8478 nt   | Aug 5 2005  |
| Potato virus V                            |           | NC_004010 | 9848 nt   | Nov 15 2002 |
| Potato virus X                            |           | NC_001455 | 6435 nt   | Nov 29 1987 |
| Potato virus Y                            |           | NC_001616 | 9704 nt   | Nov 15 2002 |
| Potato yellow mosaic Panama virus         | DNA A     | NC_002048 | 2584 nt   | Oct 9 1997  |
| Potato yellow mosaic Panama virus         | DNA B     | NC_002049 | 2542 nt   | Oct 9 1997  |
| Potato yellow mosaic Trinidad virus       |           | NC_004644 | 2535 nt   | Mar 26 2003 |
| Potato yellow mosaic Trinidad virus       |           | NC_004638 | 2582 nt   | Mar 26 2003 |
| Potato yellow mosaic virus                | DNA A     | NC_001934 | 2593 nt   | Apr 29 1993 |
| Potato yellow mosaic virus                | DNA B     | NC_001935 | 2547 nt   | Apr 29 1993 |
| Potato yellow vein virus                  | RNA 1     | NC_006062 | 8035 nt   | Jul 21 2004 |
| Potato yellow vein virus                  | RNA 2     | NC_006063 | 5339 nt   | Jul 21 2004 |
| Potato yellow vein virus                  | RNA 3     | NC_006061 | 3892 nt   | Jul 21 2004 |
| Pothos latent virus                       |           | NC_000939 | 4354 nt   | Oct 28 1999 |
| Powassan virus                            |           | NC_003687 | 10839 nt  | Jan 10 2003 |
| Procyon lotor papillomavirus type 1       |           | NC_007150 | 8170 nt   | Jun 29 2005 |
| Prunus necrotic ringspot virus            | RNA 1     | NC_004362 | 3332 nt   | Nov 9 2002  |
| Prunus necrotic ringspot virus            | RNA 2     | NC_004363 | 2591 nt   | Nov 9 2002  |
| Prunus necrotic ringspot virus            | RNA 3     | NC_004364 | 1957 nt   | Nov 9 2002  |
| Psittacid herpesvirus 1                   |           | NC_005264 | 163025 nt | Dec 3 2003  |
| Psittacus erithacus timneh papillomavirus |           | NC_003973 | 7304 nt   | Jun 2 2002  |
| Puumala virus                             | segment L | NC_005225 | 6550 nt   | Nov 28 2003 |
| Puumala virus                             | segment M | NC_005223 | 3682 nt   | Nov 18 2003 |
| Puumala virus                             | segment S | NC_005224 | 1830 nt   | Nov 18 2003 |
| Pyrobaculum spherical virus               |           | NC_005872 | 28337 nt  | May 1 2004  |
| Rabbit fibroma virus                      |           | NC_001266 | 159857 nt | Dec 15 1999 |
| Rabbit hemorrhagic disease virus          |           | NC_001543 | 7437 nt   | Nov 19      |

|                                              |           |           |           |             |
|----------------------------------------------|-----------|-----------|-----------|-------------|
|                                              |           |           |           | 2002        |
| Rabbit oral papillomavirus                   |           | NC_002232 | 7565 nt   | May 3 2000  |
| Rabies virus                                 |           | NC_001542 | 11932 nt  | Aug 3 1993  |
| Rachiplusia ou multiple nucleopolyhedrovirus |           | NC_004323 | 131526 nt | Oct 2 2002  |
| Raspberry bushy dwarf virus                  | RNA 1     | NC_003739 | 5449 nt   | May 8 1993  |
| Raspberry bushy dwarf virus                  | RNA 2     | NC_003740 | 2231 nt   | May 7 1993  |
| Raspberry ringspot virus                     | RNA 1     | NC_005266 | 7935 nt   | Dec 3 2003  |
| Raspberry ringspot virus                     | RNA 2     | NC_005267 | 3914 nt   | Dec 20 2003 |
| Rauscher murine leukemia virus               |           | NC_001819 | 8282 nt   | Jul 1 1997  |
| Red clover mottle virus                      | RNA 1     | NC_003741 | 6033 nt   | Nov 15 2002 |
| Red clover mottle virus                      | RNA 2     | NC_003738 | 3543 nt   | Nov 15 2002 |
| Red clover necrotic mosaic virus             | RNA 1     | NC_003756 | 3890 nt   | Aug 3 1993  |
| Red clover necrotic mosaic virus             | RNA 2     | NC_003775 | 1448 nt   | Jul 20 1988 |
| Respiratory syncytial virus                  |           | NC_001803 | 15191 nt  | Mar 28 1997 |
| Reston ebolavirus                            |           | NC_004161 | 18891 nt  | Sep 4 2002  |
| Reticuloendotheliosis virus                  |           | NC_006934 | 8295 nt   | Apr 7 2005  |
| Rhesus monkey papillomavirus                 |           | NC_001678 | 8028 nt   | Aug 3 1993  |
| Rhizoctonia solani virus                     | RNA 1     | NC_003801 | 2363 nt   | Jan 1 2000  |
| Rhizoctonia solani virus                     | RNA 2     | NC_003802 | 2206 nt   | Mar 9 2000  |
| Rhopalosiphum padi virus                     |           | NC_001874 | 10011 nt  | Feb 25 1998 |
| Rhynchosia Golden Mosaic Virus               |           | NC_004643 | 2624 nt   | Mar 21 2000 |
| Ribgrass mosaic virus                        |           | NC_002792 | 6301 nt   | May 16 2001 |
| Rice black streaked dwarf virus              | segment 1 | NC_003729 | 4501 nt   | Dec 14 2001 |
| Rice black streaked dwarf virus              | segment 2 | NC_003734 | 3812 nt   | Dec 14 2001 |
| Rice black streaked dwarf virus              | segment 3 | NC_003728 | 3572 nt   | Dec 14 2001 |
| Rice black streaked dwarf virus              | segment 4 | NC_003735 | 3617 nt   | Dec 14 2001 |
| Rice black streaked dwarf virus              | segment 5 | NC_003736 | 3164 nt   | Dec 14 2001 |
| Rice black streaked dwarf virus              | segment 6 | NC_003737 | 2645 nt   | Dec 14 2001 |
| Rice black streaked dwarf virus              | segment 7 | NC_003730 | 2193 nt   | Aug 28 2001 |
| Rice black streaked dwarf virus              | segment 8 | NC_003732 | 1936 nt   | Aug 28 2001 |
| Rice black streaked dwarf virus              | segment 9 | NC_003731 | 1900 nt   | Aug 28      |

|                                 |            |           |         |             |
|---------------------------------|------------|-----------|---------|-------------|
|                                 |            |           |         | 2001        |
| Rice black streaked dwarf virus | segment 10 | NC_003733 | 1801 nt | Aug 28 2001 |
| Rice dwarf virus                | segment 1  | NC_003773 | 4422 nt | Nov 13 1996 |
| Rice dwarf virus                | segment 2  | NC_003774 | 3512 nt | Nov 13 1996 |
| Rice dwarf virus                | segment 3  | NC_003772 | 3195 nt | Oct 29 1996 |
| Rice dwarf virus                | segment 4  | NC_003761 | 2218 nt | Feb 17 1996 |
| Rice dwarf virus                | segment 5  | NC_003762 | 2449 nt | Feb 17 1996 |
| Rice dwarf virus                | segment 6  | NC_003763 | 1579 nt | Feb 17 1996 |
| Rice dwarf virus                | segment 7  | NC_003760 | 1578 nt | Oct 31 1995 |
| Rice dwarf virus                | segment 8  | NC_003764 | 1397 nt | Feb 17 1996 |
| Rice dwarf virus                | segment 9  | NC_003765 | 1224 nt | Feb 17 1996 |
| Rice dwarf virus                | segment 10 | NC_003766 | 1163 nt | Feb 17 1996 |
| Rice dwarf virus                | segment 11 | NC_003767 | 1036 nt | Feb 17 1996 |
| Rice dwarf virus                | segment 12 | NC_003768 | 1066 nt | Feb 17 1996 |
| Rice grassy stunt virus         | RNA 1      | NC_002323 | 9760 nt | Aug 10 1998 |
| Rice grassy stunt virus         | RNA 2      | NC_002324 | 4056 nt | Jun 5 2000  |
| Rice grassy stunt virus         | RNA 3      | NC_002325 | 3123 nt | Jun 5 2000  |
| Rice grassy stunt virus         | RNA 4      | NC_002326 | 2915 nt | Jun 5 2000  |
| Rice grassy stunt virus         | RNA 5      | NC_002327 | 2704 nt | Jun 5 2000  |
| Rice grassy stunt virus         | RNA 6      | NC_002328 | 2584 nt | Jun 5 2000  |
| Rice ragged stunt virus         | segment 1  | NC_003749 | 3849 nt | Mar 2 1998  |
| Rice ragged stunt virus         | segment 2  | NC_003750 | 3808 nt | Mar 2 1998  |
| Rice ragged stunt virus         | segment 3  | NC_003751 | 3699 nt | Mar 2 1998  |
| Rice ragged stunt virus         | segment 4  | NC_003771 | 3823 nt | Sep 20 1998 |
| Rice ragged stunt virus         | segment 5  | NC_003759 | 2682 nt | Sep 23 1995 |
| Rice ragged stunt virus         | segment 6  | NC_003752 | 2157 nt | Mar 2 1998  |
| Rice ragged stunt virus         | segment 7  | NC_003770 | 1938 nt | Jul 19 1997 |
| Rice ragged stunt virus         | segment 8  | NC_003758 | 1914 nt | Jan 12 2004 |
| Rice ragged stunt virus         | segment 9  | NC_003757 | 1132 nt | Jan 20 1996 |
| Rice ragged stunt virus         | segment 10 | NC_003769 | 1162 nt | Jul 19 1997 |
| Rice stripe virus               | RNA 1      | NC_003755 | 8970 nt | Nov 2 1994  |

|                                         |           |           |          |             |
|-----------------------------------------|-----------|-----------|----------|-------------|
| Rice stripe virus                       | RNA 2     | NC_003754 | 3514 nt  | Feb 21 1996 |
| Rice stripe virus                       | RNA 3     | NC_003776 | 2504 nt  | Sep 3 1991  |
| Rice stripe virus                       | RNA 4     | NC_003753 | 2157 nt  | Apr 29 1993 |
| Rice tungro bacilliform virus           |           | NC_001914 | 8002 nt  | Jun 4 1991  |
| Rice tungro spherical virus             |           | NC_001632 | 12226 nt | Nov 15 2002 |
| Rice yellow mottle virus                |           | NC_001575 | 4450 nt  | Nov 15 2002 |
| Rice yellow mottle virus satellite      |           | NC_003380 | 220 nt   | Jan 10 1998 |
| Rice yellow stunt virus                 |           | NC_003746 | 14042 nt | Mar 16 1998 |
| Rift Valley fever virus                 | segment L | NC_002043 | 6606 nt  | Oct 11 1991 |
| Rift Valley fever virus                 | segment M | NC_002044 | 3885 nt  | Jan 23 2003 |
| Rift Valley fever virus                 | segment S | NC_002045 | 1690 nt  | Sep 6 1990  |
| Rinderpest virus                        |           | NC_006296 | 15882 nt | Sep 21 2004 |
| Rio Bravo virus                         |           | NC_003675 | 10140 nt | Jan 14 2003 |
| Rosellinia necatrix partitivirus 1-W8   | 1         | NC_007537 | 2299 nt  | Nov 7 2005  |
| Rosellinia necatrix partitivirus 1-W8   | 2         | NC_007538 | 2279 nt  | May 7 2005  |
| Ross River virus                        |           | NC_001544 | 11657 nt | Nov 19 2002 |
| Ross' goose hepatitis B virus           |           | NC_005888 | 3018 nt  | Jun 14 2004 |
| Rotavirus C                             | 1         | NC_007547 | 3309 nt  | Nov 7 2005  |
| Rotavirus C                             | 10        | NC_007569 | 730 nt   | Nov 7 2005  |
| Rotavirus C                             | 11        | NC_007573 | 613 nt   | Nov 2 2005  |
| Rotavirus C                             | 2         | NC_007546 | 2736 nt  | Nov 7 2005  |
| Rotavirus C                             | 3         | NC_007572 | 2283 nt  | Nov 7 2005  |
| Rotavirus C                             | 4         | NC_007574 | 2166 nt  | Nov 7 2005  |
| Rotavirus C                             | 5         | NC_007570 | 1353 nt  | Nov 7 2005  |
| Rotavirus C                             | 7         | NC_007544 | 1270 nt  | Nov 7 2005  |
| Rotavirus C                             | 8         | NC_007571 | 1063 nt  | Nov 7 2005  |
| Rotavirus C                             | 9         | NC_007545 | 1037 nt  | Nov 7 2005  |
| Rous sarcoma virus                      |           | NC_001407 | 9392 nt  | Jan 12 2004 |
| Rubella virus                           |           | NC_001545 | 9755 nt  | Mar 31 2003 |
| Rupestris stem pitting-associated virus |           | NC_001948 | 8744 nt  | Sep 14      |

|                                               |           |           |           |             |
|-----------------------------------------------|-----------|-----------|-----------|-------------|
|                                               |           |           |           | 1998        |
| Ryegrass mosaic virus                         |           | NC_001814 | 9535 nt   | Nov 15 2002 |
| Ryegrass mottle virus                         |           | NC_003747 | 4210 nt   | Nov 15 2002 |
| SARS coronavirus                              |           | NC_004718 | 29751 nt  | Sep 9 2003  |
| Sabia virus                                   | segment L | NC_006313 | 7133 nt   | Sep 24 2004 |
| Sabia virus                                   | segment S | NC_006317 | 3366 nt   | Sep 24 2004 |
| Sacbrood virus                                |           | NC_002066 | 8832 nt   | Mar 15 1999 |
| Saccharomyces cerevisiae killer virus M1      |           | NC_001782 | 1801 nt   | Dec 3 1996  |
| Saccharomyces cerevisiae narnavirus 20S RNA   |           | NC_004051 | 2514 nt   | Apr 27 1993 |
| Saccharomyces cerevisiae narnavirus 23S RNA   |           | NC_004050 | 2891 nt   | Apr 27 1993 |
| Saccharomyces cerevisiae virus L-A (L1)       |           | NC_003745 | 4579 nt   | Oct 12 1994 |
| Saccharomyces cerevisiae virus L-BC (La)      |           | NC_001641 | 4615 nt   | Dec 7 1994  |
| Saguaro cactus virus                          |           | NC_001780 | 3879 nt   | Nov 27 1996 |
| Saimiriine herpesvirus 2                      |           | NC_001350 | 112930 nt | Jul 27 1992 |
| Salmon pancreas disease virus                 |           | NC_003930 | 11919 nt  | May 28 2002 |
| Sandfly fever Naples virus                    | segment L | NC_006319 | 6404 nt   | Sep 24 2004 |
| Sandfly fever Naples virus                    | segment M | NC_006320 | 4215 nt   | Sep 24 2004 |
| Sandfly fever Naples virus                    | segment S | NC_006318 | 1869 nt   | Sep 24 2004 |
| Sapovirus C12                                 |           | NC_006554 | 7476 nt   | Dec 17 2004 |
| Sapovirus Mc10                                |           | NC_010624 | 7458 nt   | Jul 13 2004 |
| Sapporo virus                                 |           | NC_006269 | 7429 nt   | Sep 9 2004  |
| Satellite RNA of Blackcurrant reversion virus |           | NC_003872 | 1432 nt   | Jan 1 2000  |
| Satellite St. Augustine decline virus         |           | NC_005099 | 824 nt    | Sep 30 2003 |
| Satellite maize white line mosaic virus       |           | NC_003631 | 1168 nt   | Aug 3 1993  |
| Satellite of Trichomonas vaginalis T1 virus   |           | NC_004048 | 497 nt    | Sep 14 1995 |
| Satellite tobacco mosaic virus                |           | NC_003796 | 1058 nt   | Aug 16 1994 |
| Satsuma dwarf virus                           | RNA 1     | NC_003785 | 6794 nt   | Nov 15 2002 |
| Satsuma dwarf virus                           | RNA 2     | NC_003786 | 5344 nt   | Nov 15 2002 |
| Scallion mosaic virus                         |           | NC_003399 | 9324 nt   | Feb 6 2002  |
| Scallion virus X                              |           | NC_003400 | 6985 nt   | Feb 6 2002  |
| Schizochytrium single-stranded RNA virus      |           | NC_007522 | 9035 nt   | Nov 9       |

|                                                            |           |           |           |             |
|------------------------------------------------------------|-----------|-----------|-----------|-------------|
|                                                            |           |           |           | 2005        |
| Sclerophthora macrospora virus A                           | RNA 1     | NC_005817 | 2928 nt   | Mar 16 2004 |
| Sclerophthora macrospora virus A                           | RNA 2     | NC_005818 | 1981 nt   | Mar 16 2004 |
| Sclerophthora macrospora virus A                           | RNA 3     | NC_005819 | 977 nt    | Mar 16 2004 |
| Sclerophthora macrospora virus B                           |           | NC_004714 | 5533 nt   | Apr 10 2003 |
| Sclerotinia sclerotiorum debilitation-associated RNA virus |           | NC_007415 | 5470 nt   | Sep 1 2003  |
| Semliki forest virus                                       |           | NC_003215 | 11442 nt  | Apr 8 2003  |
| Sendai virus                                               |           | NC_001552 | 15384 nt  | Jan 17 1998 |
| Senecio yellow mosaic virus                                |           | NC_006995 | 2746 nt   | May 11 2005 |
| Seoul virus                                                | segment L | NC_005238 | 6530 nt   | Nov 25 2003 |
| Seoul virus                                                | segment S | NC_005236 | 1769 nt   | Nov 25 2003 |
| Seoul virus 80-39                                          | segment M | NC_005237 | 3651 nt   | May 7 1993  |
| Sesbania mosaic virus                                      |           | NC_002568 | 4149 nt   | Nov 15 2002 |
| Shallot latent virus                                       |           | NC_003557 | 8363 nt   | Feb 6 2002  |
| Shallot virus X                                            |           | NC_003795 | 8832 nt   | Jun 12 1993 |
| Shallot yellow stripe virus                                |           | NC_007433 | 10429 nt  | Sep 28 2005 |
| Sheeppox virus                                             |           | NC_004002 | 149955 nt | Jun 20 2002 |
| Sheldgoose hepatitis B virus                               |           | NC_005890 | 3051 nt   | Jun 14 2004 |
| Shrimp white spot syndrome virus                           |           | NC_003225 | 305107 nt | Nov 20 2001 |
| Sida golden mosaic Costa Rica virus                        | DNA A     | NC_004657 | 2605 nt   | Mar 28 2003 |
| Sida golden mosaic Costa Rica virus                        | DNA B     | NC_004658 | 2587 nt   | Mar 28 2003 |
| Sida golden mosaic Florida virus                           |           | NC_004636 | 2581 nt   | Mar 26 2003 |
| Sida golden mosaic Honduras virus                          | DNA A     | NC_004659 | 2603 nt   | Mar 28 2003 |
| Sida golden mosaic Honduras virus                          | DNA B     | NC_004660 | 2589 nt   | Mar 28 2003 |
| Sida golden mosaic virus                                   | DNA A     | NC_002046 | 2642 nt   | Mar 6 1998  |
| Sida golden mosaic virus                                   | DNA B     | NC_002047 | 2585 nt   | Jan 6 1998  |
| Sida golden yellow vein virus                              |           | NC_004635 | 2603 nt   | Mar 26 2003 |
| Sida leaf curl virus                                       |           | NC_007638 | 2757 nt   | Dec 12 2005 |
| Sida leaf curl virus-associated DNA 1                      |           | NC_007640 | 1384 nt   | Dec 12 2005 |
| Sida leaf curl virus-associated DNA beta                   |           | NC_007639 | 1365 nt   | Dec 12      |



|                                                      |           |           |          |             |
|------------------------------------------------------|-----------|-----------|----------|-------------|
|                                                      |           |           |          | 2005        |
| Sida micrantha mosaic virus                          | DNA A     | NC_005330 | 2675 nt  | Jan 21 2004 |
| Sida micrantha mosaic virus                          | DNA B     | NC_005331 | 2656 nt  | Jan 21 2004 |
| Sida mottle virus                                    |           | NC_004637 | 2668 nt  | Mar 26 2003 |
| Sida yellow mosaic virus                             |           | NC_004639 | 2661 nt  | Mar 26 2003 |
| Sida yellow mosaic virus-[China]-associated DNA beta |           | NC_006267 | 1346 nt  | Aug 18 2004 |
| Sida yellow vein virus                               | DNA A     | NC_004661 | 2612 nt  | Mar 28 2003 |
| Sida yellow vein virus                               | DNA B     | NC_004662 | 2593 nt  | Mar 28 2003 |
| Sida yellow vein virus-associated DNA beta           |           | NC_007213 | 1355 nt  | Aug 2 2005  |
| Simian T-lymphotropic virus 1                        |           | NC_000858 | 9028 nt  | Jun 14 1999 |
| Simian T-lymphotropic virus 2                        |           | NC_001815 | 8855 nt  | Dec 18 2003 |
| Simian T-lymphotropic virus 3                        |           | NC_003323 | 8918 nt  | Dec 19 2001 |
| Simian adenovirus 1                                  |           | NC_006879 | 34450 nt | Mar 6 2005  |
| Simian adenovirus 21                                 |           | AC_000010 | 35524 nt | Dec 1 2004  |
| Simian adenovirus 25                                 |           | AC_000011 | 36519 nt | Dec 1 2004  |
| Simian adenovirus A                                  |           | NC_006144 | 34246 nt | Aug 24 2004 |
| Simian enterovirus A                                 |           | NC_003988 | 7374 nt  | Oct 22 2002 |
| Simian foamy virus                                   |           | NC_001364 | 13246 nt | Jul 5 1994  |
| Simian hemorrhagic fever virus                       |           | NC_003092 | 15717 nt | Nov 27 2002 |
| Simian immunodeficiency virus                        |           | NC_001549 | 9623 nt  | Aug 3 1993  |
| Simian immunodeficiency virus SIV-mnd 2              |           | NC_004455 | 9518 nt  | Dec 20 2002 |
| Simian parainfluenza virus 41                        |           | NC_006428 | 15450 nt | Nov 15 2004 |
| Simian parainfluenza virus 5                         |           | NC_006430 | 15246 nt | Mar 21 1998 |
| Simian picornavirus 1                                |           | NC_004451 | 8126 nt  | Oct 29 2003 |
| Simian virus 40                                      |           | NC_001669 | 5243 nt  | Aug 3 1993  |
| Simian-Human immunodeficiency virus                  |           | NC_001870 | 10000 nt | Feb 2 1998  |
| Sin Nombre virus                                     | segment L | NC_005217 | 6562 nt  | Nov 18 2003 |
| Sin Nombre virus                                     | segment M | NC_005215 | 3696 nt  | Nov 18 2003 |
| Sin Nombre virus                                     | segment S | NC_005216 | 2059 nt  | Nov 18 2003 |
| Sindbis virus                                        |           | NC_001547 | 11703 nt | Nov 19      |

|                                               |       |           |           |             |
|-----------------------------------------------|-------|-----------|-----------|-------------|
|                                               |       |           |           | 2002        |
| Singapore grouper iridovirus                  |       | NC_006549 | 140131 nt | Dec 17 2004 |
| Sleeping disease virus                        |       | NC_003433 | 11900 nt  | Nov 19 2002 |
| Small anellovirus 1                           |       | NC_007013 | 2249 nt   | May 21 2005 |
| Small anellovirus 2                           |       | NC_007014 | 2635 nt   | May 1 2005  |
| Snake parvovirus 1                            |       | NC_006148 | 4432 nt   | Aug 25 2004 |
| Snakehead retrovirus                          |       | NC_001724 | 10688 nt  | May 30 1996 |
| Snakehead rhabdovirus                         |       | NC_000903 | 11550 nt  | Sep 29 1999 |
| Snow goose hepatitis B virus                  |       | NC_005950 | 3024 nt   | Jun 25 2004 |
| Soil-borne cereal mosaic virus                | RNA 1 | NC_002351 | 7025 nt   | Sep 26 1999 |
| Soil-borne cereal mosaic virus                | RNA 2 | NC_002330 | 3683 nt   | Oct 8 1999  |
| Soil-borne wheat mosaic virus                 | RNA 1 | NC_002041 | 7099 nt   | Jun 12 1993 |
| Soil-borne wheat mosaic virus                 | RNA 2 | NC_002042 | 3593 nt   | Jun 12 1993 |
| Solanum nodiflorum mottle virus satellite RNA |       | NC_003850 | 377 nt    | Aug 2 1993  |
| Solenopsis invicta virus 1                    |       | NC_006559 | 8026 nt   | Dec 17 2004 |
| Sonchus yellow net virus                      |       | NC_001615 | 13720 nt  | May 9 1994  |
| Sorghum chlorotic spot virus                  | RNA 1 | NC_004014 | 6878 nt   | Apr 21 2000 |
| Sorghum chlorotic spot virus                  | RNA 2 | NC_004015 | 3418 nt   | Jun 18 2002 |
| Sorghum mosaic virus                          |       | NC_004035 | 9624 nt   | Nov 15 2002 |
| South African cassava mosaic virus            | DNA A | NC_003803 | 2800 nt   | Feb 20 2000 |
| South African cassava mosaic virus            | DNA B | NC_003804 | 2760 nt   | Feb 20 2000 |
| Southern bean mosaic virus                    |       | NC_004060 | 4136 nt   | Nov 15 2002 |
| Southern cowpea mosaic virus                  |       | NC_001625 | 4194 nt   | Nov 15 2002 |
| Soybean chlorotic mottle virus                |       | NC_001739 | 8178 nt   | Mar 2 1990  |
| Soybean crinkle leaf virus                    |       | NC_003357 | 2737 nt   | Jan 5 2002  |
| Soybean dwarf virus                           |       | NC_003056 | 5853 nt   | Aug 11 2001 |
| Soybean mosaic virus                          |       | NC_002634 | 9588 nt   | Nov 15 2002 |
| Sphaeropsis sapinea RNA virus 1               |       | NC_001963 | 5163 nt   | Oct 29 1998 |
| Sphaeropsis sapinea RNA virus 2               |       | NC_001964 | 5202 nt   | Oct 29 1998 |
| Spinach curly top virus                       |       | NC_005860 | 2925 nt   | Apr 17      |

|                                        |           |           |           |             |
|----------------------------------------|-----------|-----------|-----------|-------------|
|                                        |           |           |           | 2004        |
| Spinach latent virus                   | RNA 1     | NC_003808 | 3439 nt   | Jan 30 1998 |
| Spinach latent virus                   | RNA 2     | NC_003809 | 2939 nt   | Jan 30 1998 |
| Spinach latent virus                   | RNA 3     | NC_003810 | 2310 nt   | Jan 30 1998 |
| Spleen focus-forming virus             |           | NC_001500 | 6296 nt   | Aug 2 1993  |
| Spodoptera exigua nucleopolyhedrovirus |           | NC_002169 | 135611 nt | Feb 11 2000 |
| Spodoptera litura nucleopolyhedrovirus |           | NC_003102 | 139342 nt | Sep 11 2001 |
| Spring beauty latent virus             | RNA 1     | NC_004120 | 3252 nt   | Aug 28 2002 |
| Spring beauty latent virus             | RNA 2     | NC_004121 | 2898 nt   | Aug 28 2002 |
| Spring beauty latent virus             | RNA 3     | NC_004122 | 2213 nt   | Aug 28 2002 |
| Spring viremia of carp virus           |           | NC_002803 | 11019 nt  | Nov 16 1995 |
| Squash leaf curl China virus           | DNA A     | NC_007339 | 2736 nt   | Aug 15 2005 |
| Squash leaf curl China virus           | DNA B     | NC_007338 | 2719 nt   | Aug 15 2005 |
| Squash leaf curl Philippines virus     | DNA A     | NC_005845 | 2739 nt   | Apr 13 2004 |
| Squash leaf curl Philippines virus     | DNA B     | NC_005846 | 2705 nt   | Apr 13 2004 |
| Squash leaf curl Yunnan virus          |           | NC_004651 | 2714 nt   | Jan 4 2002  |
| Squash leaf curl virus                 | DNA A     | NC_001936 | 2634 nt   | Aug 3 1993  |
| Squash leaf curl virus                 | DNA B     | NC_001937 | 2607 nt   | Aug 3 1993  |
| Squash mild leaf curl virus            | DNA A     | NC_004645 | 2612 nt   | Mar 26 2003 |
| Squash mild leaf curl virus            | DNA B     | NC_004646 | 2578 nt   | Mar 26 2003 |
| Squash mosaic virus                    | RNA 1     | NC_003799 | 5865 nt   | Nov 15 2002 |
| Squash mosaic virus                    | RNA 2     | NC_003800 | 3354 nt   | Nov 15 2002 |
| Squash yellow mild mottle virus        | DNA A     | NC_003865 | 2663 nt   | Dec 26 2001 |
| Squash yellow mild mottle virus        | DNA B     | NC_003860 | 2662 nt   | Nov 20 2001 |
| Sri Lankan cassava mosaic virus        | DNA A     | NC_003861 | 2755 nt   | Jan 4 2002  |
| Sri Lankan cassava mosaic virus        | DNA B     | NC_003862 | 2711 nt   | Jan 4 2002  |
| St Croix river virus                   | segment 8 | NC_006004 | 1256 nt   | Jul 13 2004 |
| St Croix river virus                   | segment 1 | NC_005997 | 4089 nt   | Nov 25 2000 |
| St Croix river virus                   | segment 2 | NC_005998 | 2747 nt   | Jul 13 2004 |
| St Croix river virus                   | segment 3 | NC_005999 | 2024 nt   | Jul 13 2004 |

|                                                |            |           |          |             |
|------------------------------------------------|------------|-----------|----------|-------------|
| St Croix river virus                           | segment 4  | NC_006000 | 2017 nt  | Jul 13 2004 |
| St Croix river virus                           | segment 5  | NC_006001 | 1664 nt  | Jul 13 2004 |
| St Croix river virus                           | segment 6  | NC_006002 | 1657 nt  | Jul 13 2004 |
| St Croix river virus                           | segment 7  | NC_006003 | 1463 nt  | Jul 13 2004 |
| St Croix river virus                           | segment 9  | NC_006005 | 764 nt   | Jul 13 2004 |
| St Croix river virus                           | segment 10 | NC_006006 | 764 nt   | Jul 13 2004 |
| St. Louis encephalitis virus                   |            | NC_007580 | 10293 nt | Oct 30 2005 |
| Stachytarpheta leaf curl virus                 |            | NC_004091 | 2749 nt  | Jul 30 2002 |
| Strawberry latent ringspot virus               | RNA1       | NC_006964 | 7496 nt  | Jan 29 2005 |
| Strawberry latent ringspot virus               | RNA2       | NC_006965 | 3842 nt  | Apr 8 2005  |
| Strawberry latent ringspot virus satellite RNA |            | NC_003848 | 1118 nt  | Jun 24 1993 |
| Strawberry mild yellow edge virus              |            | NC_003794 | 5966 nt  | Apr 29 1993 |
| Strawberry mottle virus                        | RNA 1      | NC_003445 | 7036 nt  | Nov 15 2002 |
| Strawberry mottle virus                        | RNA 2      | NC_003446 | 5619 nt  | Nov 15 2002 |
| Strawberry pallidosis associated virus         | RNA 1      | NC_005895 | 8067 nt  | Jun 14 2004 |
| Strawberry pallidosis associated virus         | RNA 2      | NC_005896 | 7979 nt  | Jun 1 2004  |
| Strawberry vein banding virus                  |            | NC_001725 | 7876 nt  | Jun 1 1996  |
| Striped Jack nervous necrosis virus            | RNA 1      | NC_003448 | 3107 nt  | Sep 4 2001  |
| Striped Jack nervous necrosis virus            | RNA 2      | NC_003449 | 1421 nt  | Sep 4 2001  |
| Subterranean clover mottle virus               |            | NC_004346 | 4258 nt  | Nov 15 2002 |
| Subterranean clover mottle virus satellite RNA |            | NC_003851 | 388 nt   | Aug 3 1993  |
| Subterranean clover stunt virus                | DNA 1      | NC_003813 | 1001 nt  | Nov 27 1994 |
| Subterranean clover stunt virus                | DNA 2      | NC_003814 | 1022 nt  | Nov 27 1994 |
| Subterranean clover stunt virus                | DNA 3      | NC_003815 | 991 nt   | Nov 27 1994 |
| Subterranean clover stunt virus                | DNA 4      | NC_003816 | 1002 nt  | Nov 27 1994 |
| Subterranean clover stunt virus                | DNA 5      | NC_003817 | 998 nt   | Nov 27 1994 |
| Subterranean clover stunt virus                | DNA 6      | NC_003818 | 1017 nt  | Nov 27 1994 |
| Subterranean clover stunt virus                | DNA 7      | NC_003819 | 988 nt   | Nov 27 1994 |
| Subterranean clover stunt virus                | DNA 8      | NC_003812 | 1005 nt  | Jul 3 2000  |
| Sudan ebolavirus                               |            | NC_006432 | 18875 nt | Sep 25 2004 |
| Sugarcane bacilliform IM virus                 |            | NC_003031 | 7687 nt  | Jul 26      |

|                                           |           |           |           |             |
|-------------------------------------------|-----------|-----------|-----------|-------------|
|                                           |           |           |           | 2001        |
| Sugarcane mosaic virus                    |           | NC_003398 | 9596 nt   | Nov 15 2002 |
| Sugarcane streak Egypt virus - [Giza]     |           | NC_001868 | 2706 nt   | Jan 26 1998 |
| Sugarcane streak Reunion virus            |           | NC_004755 | 2735 nt   | Apr 28 2003 |
| Sugarcane streak virus                    |           | NC_003744 | 2758 nt   | Aug 3 1993  |
| Sugarcane striate mosaic associated virus |           | NC_003870 | 8146 nt   | Sep 19 2001 |
| Sugarcane yellow leaf virus               |           | NC_000874 | 5899 nt   | Jul 28 1999 |
| Suid herpesvirus 1                        |           | NC_006151 | 143461 nt | Dec 20 2003 |
| Sweet clover necrotic mosaic virus        | RNA 1     | NC_003806 | 3876 nt   | Jul 26 1993 |
| Sweet clover necrotic mosaic virus        | RNA 2     | NC_003807 | 1449 nt   | May 8 1993  |
| Sweet potato chlorotic fleck virus        |           | NC_006550 | 9104 nt   | Nov 30 2004 |
| Sweet potato chlorotic stunt virus        | RNA 1     | NC_004123 | 9407 nt   | Nov 15 2002 |
| Sweet potato chlorotic stunt virus        | RNA 2     | NC_004124 | 8223 nt   | Aug 27 2002 |
| Sweet potato feathery mottle virus        |           | NC_001841 | 10820 nt  | Nov 15 2002 |
| Sweet potato leaf curl Georgia virus      |           | NC_004640 | 2773 nt   | Mar 26 2003 |
| Sweet potato leaf curl virus              |           | NC_004650 | 2828 nt   | Mar 27 2003 |
| Sweet potato mild mottle virus            |           | NC_003797 | 10818 nt  | Nov 15 2002 |
| Swinepox virus                            |           | NC_003389 | 146454 nt | Jan 31 2002 |
| TTV-like mini virus                       |           | NC_002195 | 2915 nt   | Apr 4 2000  |
| TYLCCNV-[Y322] satellite DNA beta         |           | NC_007735 | 1331 nt   | Jan 23 2006 |
| Tacaribe virus                            | segment L | NC_004292 | 7102 nt   | Aug 3 1993  |
| Tacaribe virus                            | segment S | NC_004293 | 3432 nt   | Aug 3 1993  |
| Tamana bat virus                          |           | NC_003996 | 10053 nt  | Jan 14 2003 |
| Taro bacilliform virus                    |           | NC_004450 | 7458 nt   | Dec 18 2002 |
| Taro vein chlorosis virus                 |           | NC_006942 | 12020 nt  | Jan 26 2005 |
| Taura syndrome virus                      |           | NC_003005 | 10205 nt  | Jul 12 2001 |
| Theilovirus                               |           | NC_001366 | 8101 nt   | Nov 19 2002 |
| Thermoproteus tenax spherical virus 1     |           | NC_006556 | 20933 nt  | Sep 20 2004 |
| Thielaviopsis basicola dsRNA virus 1      |           | NC_005883 | 5310 nt   | Mar 23 2004 |

|                                                            |       |           |          |             |
|------------------------------------------------------------|-------|-----------|----------|-------------|
| Thogoto virus                                              | 1     | NC_006508 | 2375 nt  | Dec 7 2004  |
| Thogoto virus                                              | 2     | NC_006495 | 2212 nt  | Dec 7 2004  |
| Thogoto virus                                              | 3     | NC_006496 | 1927 nt  | Dec 7 2004  |
| Thogoto virus                                              | 4     | NC_006506 | 1574 nt  | Dec 7 2004  |
| Thogoto virus                                              | 5     | NC_006507 | 1418 nt  | Dec 7 2004  |
| Thogoto virus                                              | 6     | NC_006504 | 955 nt   | Dec 7 2004  |
| Thunberg fritillary virus                                  |       | NC_007180 | 9723 nt  | Jul 6 2005  |
| Tick-borne encephalitis virus                              |       | NC_001672 | 11141 nt | Jan 10 2003 |
| Tioman virus                                               |       | NC_004074 | 15522 nt | Jul 23 2002 |
| Tobacco bushy top virus                                    |       | NC_004366 | 4152 nt  | Nov 14 2002 |
| Tobacco bushy top virus isolate Baoshan satellite-like RNA |       | NC_006459 | 779 nt   | May 27 2002 |
| Tobacco bushy top virus satellite-like RNA                 |       | NC_006458 | 781 nt   | Nov 22 2004 |
| Tobacco curly shoot virus                                  |       | NC_003722 | 2743 nt  | Apr 23 2002 |
| Tobacco curly shoot virus associated DNA 1                 |       | NC_005057 | 1367 nt  | Aug 5 2003  |
| Tobacco curly shoot virus-associated DNA beta              |       | NC_004546 | 1354 nt  | Jan 27 2003 |
| Tobacco etch virus                                         |       | NC_001555 | 9494 nt  | Nov 15 2002 |
| Tobacco leaf curl Japan virus                              |       | NC_004654 | 2761 nt  | Mar 27 2003 |
| Tobacco leaf curl Kochi virus                              |       | NC_004641 | 2760 nt  | Mar 26 2003 |
| Tobacco leaf curl Yunnan virus                             |       | NC_004356 | 2750 nt  | Oct 25 2002 |
| Tobacco leaf curl Yunnan virus associated DNA 1            |       | NC_005060 | 1370 nt  | Aug 5 2003  |
| Tobacco leaf curl Yunnan virus satellite DNA beta          |       | NC_005030 | 1336 nt  | Jul 10 2003 |
| Tobacco leaf curl Zimbabwe virus                           |       | NC_002817 | 2767 nt  | Jul 2 2001  |
| Tobacco leaf curl disease associated sequence              |       | NC_005049 | 1356 nt  | Jul 29 2003 |
| Tobacco mild green mosaic virus                            |       | NC_001556 | 6355 nt  | Aug 3 1993  |
| Tobacco mosaic virus                                       |       | NC_001367 | 6395 nt  | Jul 13 1983 |
| Tobacco necrosis satellite virus                           |       | NC_001557 | 1239 nt  | Aug 3 1993  |
| Tobacco necrosis virus A                                   |       | NC_001777 | 3684 nt  | Jul 26 1993 |
| Tobacco necrosis virus D                                   |       | NC_003487 | 3762 nt  | Jul 2 1997  |
| Tobacco rattle virus                                       | RNA 1 | NC_003805 | 6791 nt  | Aug 10 1999 |
| Tobacco rattle virus                                       | RNA 2 | NC_003811 | 3855 nt  | Sep 7 1994  |

|                                            |       |           |         |             |
|--------------------------------------------|-------|-----------|---------|-------------|
| Tobacco ringspot virus                     | RNA 1 | NC_005097 | 7514 nt | Sep 13 2003 |
| Tobacco ringspot virus                     | RNA 2 | NC_005096 | 3929 nt | Jul 20 2004 |
| Tobacco ringspot virus satellite RNA       |       | NC_003889 | 359 nt  | Aug 3 1993  |
| Tobacco streak virus                       | RNA 1 | NC_003844 | 3491 nt | Mar 4 1997  |
| Tobacco streak virus                       | RNA 2 | NC_003842 | 2926 nt | Mar 3 1997  |
| Tobacco streak virus                       | RNA 3 | NC_003845 | 2205 nt | Dec 6 1983  |
| Tobacco vein mottling virus                |       | NC_001768 | 9475 nt | Nov 15 2002 |
| Tobacco vein-clearing virus                |       | NC_003378 | 7767 nt | Nov 15 1999 |
| Tobacco yellow dwarf virus                 |       | NC_003822 | 2580 nt | Aug 3 1993  |
| Tomato aspermy virus                       | RNA 1 | NC_003837 | 3410 nt | Apr 29 1993 |
| Tomato aspermy virus                       | RNA 2 | NC_003838 | 3074 nt | May 15 2002 |
| Tomato aspermy virus                       | RNA 3 | NC_003836 | 2386 nt | Apr 7 2000  |
| Tomato begomovirus satellite DNA beta      |       | NC_004904 | 1342 nt | Jun 21 2003 |
| Tomato black ring virus                    | RNA 1 | NC_004439 | 7358 nt | Jan 29 2004 |
| Tomato black ring virus                    | RNA 2 | NC_004440 | 4633 nt | Dec 19 2002 |
| Tomato black ring virus satellite RNA      |       | NC_003890 | 1374 nt | Apr 2 1988  |
| Tomato bushy stunt virus                   |       | NC_001554 | 4776 nt | Aug 3 1993  |
| Tomato bushy stunt virus satellite RNA B1  |       | NC_003826 | 822 nt  | Oct 26 1997 |
| Tomato bushy stunt virus satellite RNA B10 |       | NC_003827 | 612 nt  | Oct 26 1997 |
| Tomato chino La Paz virus                  |       | NC_005843 | 2606 nt | Apr 13 2004 |
| Tomato chlorosis virus                     | RNA 1 | NC_007340 | 8595 nt | Aug 12 2005 |
| Tomato chlorosis virus                     | RNA 2 | NC_007341 | 8247 nt | Aug 12 2005 |
| Tomato chlorotic mottle virus              | DNA A | NC_003664 | 2622 nt | Apr 15 2002 |
| Tomato chlorotic mottle virus              | DNA B | NC_003665 | 2573 nt | Apr 16 2002 |
| Tomato curly stunt virus                   |       | NC_004675 | 2766 nt | Apr 3 2003  |
| Tomato golden mosaic virus                 | DNA A | NC_001507 | 2588 nt | Aug 2 1993  |
| Tomato golden mosaic virus                 | DNA B | NC_001508 | 2508 nt | Mar 2 2001  |
| Tomato leaf curl Bangalore virus           |       | NC_003891 | 2749 nt | Aug 14 1995 |
| Tomato leaf curl Bangladesh virus          |       | NC_004614 | 2761 nt | Mar 17      |

|                                                      |       |           |         |             |
|------------------------------------------------------|-------|-----------|---------|-------------|
|                                                      |       |           |         | 2003        |
| Tomato leaf curl China virus                         |       | NC_005320 | 2738 nt | Jan 13 2004 |
| Tomato leaf curl China virus-associated DNA beta     |       | NC_006289 | 1343 nt | May 15 2004 |
| Tomato leaf curl Gujarat virus                       | DNA A | NC_004558 | 2757 nt | Feb 5 2003  |
| Tomato leaf curl Gujarat virus                       | DNA B | NC_004559 | 2688 nt | Feb 5 2003  |
| Tomato leaf curl Iran virus                          |       | NC_005842 | 2763 nt | Jun 22 2003 |
| Tomato leaf curl Java virus                          |       | NC_005031 | 2752 nt | Jul 10 2003 |
| Tomato leaf curl Java virus-[Ageratum] satellite DNA |       | NC_005497 | 1360 nt | Feb 20 2004 |
| Tomato leaf curl Joydebpur virus                     |       | NC_007723 | 2761 nt | Jan 13 2006 |
| Tomato leaf curl Karnataka virus                     |       | NC_003897 | 2759 nt | Oct 24 1995 |
| Tomato leaf curl Laos virus                          |       | NC_004613 | 2748 nt | Mar 17 2003 |
| Tomato leaf curl Madagascar virus                    |       | NC_006874 | 2777 nt | Mar 1 2005  |
| Tomato leaf curl Malaysia virus                      |       | NC_004648 | 2754 nt | Mar 27 2003 |
| Tomato leaf curl Mali virus                          |       | NC_005348 | 2773 nt | Jan 21 2004 |
| Tomato leaf curl Mayotte virus                       |       | NC_006876 | 2768 nt | Mar 1 2005  |
| Tomato leaf curl New Delhi virus                     | DNA A | NC_004611 | 2739 nt | Mar 15 2003 |
| Tomato leaf curl New Delhi virus                     | DNA B | NC_004612 | 2696 nt | Mar 15 2003 |
| Tomato leaf curl New Delhi virus-associated DNA beta |       | NC_005359 | 1012 nt | Jan 24 2004 |
| Tomato leaf curl Philippines virus                   |       | NC_005032 | 2755 nt | Jul 10 2003 |
| Tomato leaf curl Sri Lanka virus                     |       | NC_004647 | 2756 nt | Mar 27 2003 |
| Tomato leaf curl Sudan virus                         |       | NC_005855 | 2779 nt | Apr 15 2004 |
| Tomato leaf curl Taiwan virus                        |       | NC_003898 | 2739 nt | Jun 13 1997 |
| Tomato leaf curl Vietnam virus                       |       | NC_004153 | 2745 nt | Jun 2 2001  |
| Tomato leaf curl disease associated sequence         |       | NC_005050 | 1370 nt | Jul 29 2003 |
| Tomato leaf curl disease associated sequence         |       | NC_004715 | 1424 nt | Apr 10 2003 |
| Tomato leaf curl virus                               |       | NC_003896 | 2766 nt | May 21 2002 |
| Tomato leaf curl virus satellite DNA                 |       | NC_002743 | 682 nt  | Jan 1 1998  |
| Tomato mosaic Havana virus                           | DNA A | NC_003867 | 2620 nt | Sep 4 1998  |
| Tomato mosaic Havana virus                           | DNA B | NC_003868 | 2586 nt | Sep 4 1998  |
| Tomato mosaic leaf curl virus                        | DNA A | NC_005850 | 2560 nt | Apr 15 2004 |
| Tomato mosaic leaf curl virus                        | DNA B | NC_005851 | 2525 nt | Apr 15 2004 |



|                                                           |           |           |         |             |
|-----------------------------------------------------------|-----------|-----------|---------|-------------|
| Tomato mosaic virus                                       |           | NC_002692 | 6383 nt | Mar 12 2001 |
| Tomato mottle Taino virus                                 | DNA A     | NC_001828 | 2597 nt | Aug 9 1997  |
| Tomato mottle Taino virus                                 | DNA B     | NC_001917 | 2562 nt | Aug 9 1997  |
| Tomato mottle virus                                       | DNA A     | NC_001938 | 2601 nt | Jun 12 1993 |
| Tomato mottle virus                                       | DNA B     | NC_001939 | 2544 nt | Jun 12 1993 |
| Tomato pseudo-curly top virus                             |           | NC_003825 | 2861 nt | Jun 28 1996 |
| Tomato ringspot virus                                     | RNA 1     | NC_003840 | 8214 nt | Nov 15 2002 |
| Tomato ringspot virus                                     | RNA 2     | NC_003839 | 7273 nt | Nov 15 2002 |
| Tomato rugose mosaic virus                                | DNA A     | NC_002555 | 2622 nt | Sep 25 2000 |
| Tomato rugose mosaic virus                                | DNA B     | NC_002556 | 2572 nt | Sep 25 2000 |
| Tomato severe leaf curl virus                             |           | NC_004642 | 2593 nt | Mar 26 2003 |
| Tomato spotted wilt virus                                 | segment L | NC_002052 | 8897 nt | Apr 29 1993 |
| Tomato spotted wilt virus                                 | segment M | NC_002050 | 4821 nt | Apr 27 2004 |
| Tomato spotted wilt virus                                 | segment S | NC_002051 | 2916 nt | Apr 29 1993 |
| Tomato yellow leaf curl Axarquia virus                    |           | NC_007676 | 2772 nt | Dec 21 2005 |
| Tomato yellow leaf curl China virus                       |           | NC_004044 | 2734 nt | Oct 29 2000 |
| Tomato yellow leaf curl China virus associated DNA 1      |           | NC_005058 | 1363 nt | Aug 5 2003  |
| Tomato yellow leaf curl China virus-associated DNA beta   |           | NC_004544 | 1339 nt | Jan 24 2003 |
| Tomato yellow leaf curl Kanchanaburi virus                | DNA A     | NC_005812 | 2752 nt | Mar 15 2004 |
| Tomato yellow leaf curl Kanchanaburi virus                | DNA B     | NC_005811 | 2752 nt | Mar 15 2004 |
| Tomato yellow leaf curl Malaga virus                      |           | NC_004569 | 2782 nt | Feb 14 2003 |
| Tomato yellow leaf curl Mali virus                        |           | NC_005346 | 2794 nt | Jan 21 2004 |
| Tomato yellow leaf curl Mali virus-associated DNA beta    |           | NC_007485 | 1348 nt | Aug 13 2005 |
| Tomato yellow leaf curl Sardinia virus                    |           | NC_003828 | 2773 nt | Dec 20 1991 |
| Tomato yellow leaf curl Thailand virus                    | DNA A     | NC_000869 | 2751 nt | Jun 16 1999 |
| Tomato yellow leaf curl Thailand virus                    | DNA B     | NC_000870 | 2737 nt | Jun 16 1999 |
| Tomato yellow leaf curl Thailand virus associated DNA 1   |           | NC_005059 | 1363 nt | Aug 5 2003  |
| Tomato yellow leaf curl Thailand virus satellite DNA beta |           | NC_004903 | 1337 nt | Jun 17 2003 |
| Tomato yellow leaf curl virus                             |           | NC_004005 | 2781 nt | Jun 7 2002  |

|                                                      |           |           |           |             |
|------------------------------------------------------|-----------|-----------|-----------|-------------|
| Tomato yellow margin leaf curl virus                 | DNA A     | NC_005852 | 2575 nt   | Apr 15 2004 |
| Tomato yellow margin leaf curl virus                 | DNA B     | NC_005853 | 2543 nt   | Apr 15 2004 |
| Tomato yellow spot virus                             | DNA A     | NC_007726 | 2674 nt   | Jan 23 2006 |
| Tomato yellow spot virus                             | DNA B     | NC_007727 | 2626 nt   | Jan 23 2006 |
| Torque teno virus                                    |           | NC_002076 | 3852 nt   | Apr 3 2003  |
| Transmissible gastroenteritis virus                  |           | NC_002306 | 28586 nt  | Apr 28 2003 |
| Tree shrew adenovirus                                |           | NC_004453 | 33501 nt  | Aug 26 2004 |
| Triatoma virus                                       |           | NC_003783 | 9010 nt   | Oct 1 1999  |
| Trichechus manatus latirostris papillomavirus type 1 |           | NC_006563 | 7722 nt   | Dec 17 2004 |
| Trichomonas vaginalis virus                          |           | NC_003824 | 4647 nt   | Mar 9 1995  |
| Trichomonas vaginalis virus 3                        |           | NC_004034 | 4844 nt   | Dec 2 2001  |
| Trichomonas vaginalis virus II                       |           | NC_003873 | 4674 nt   | Feb 2 2000  |
| Trichoplusia ni SNPV                                 |           | NC_007383 | 134394 nt | Aug 11 2005 |
| Trichoplusia ni cytoplasmic polyhedrosis virus 15    | RNA 1     | NC_002557 | 4361 nt   | Aug 14 2000 |
| Trichoplusia ni cytoplasmic polyhedrosis virus 15    | RNA 2     | NC_002558 | 4187 nt   | Aug 14 2000 |
| Trichoplusia ni cytoplasmic polyhedrosis virus 15    | RNA 3     | NC_002559 | 3878 nt   | Aug 14 2000 |
| Trichoplusia ni cytoplasmic polyhedrosis virus 15    | RNA 4     | NC_002567 | 3311 nt   | Aug 14 2000 |
| Trichoplusia ni cytoplasmic polyhedrosis virus 15    | RNA 5     | NC_002560 | 2260 nt   | Aug 14 2000 |
| Trichoplusia ni cytoplasmic polyhedrosis virus 15    | RNA 6     | NC_002561 | 1859 nt   | Aug 14 2000 |
| Trichoplusia ni cytoplasmic polyhedrosis virus 15    | RNA 7     | NC_002562 | 1776 nt   | Aug 14 2000 |
| Trichoplusia ni cytoplasmic polyhedrosis virus 15    | RNA 8     | NC_002563 | 1234 nt   | Aug 14 2000 |
| Trichoplusia ni cytoplasmic polyhedrosis virus 15    | RNA 9     | NC_002564 | 1157 nt   | Aug 14 2000 |
| Trichoplusia ni cytoplasmic polyhedrosis virus 15    | RNA 10    | NC_002565 | 897 nt    | Aug 14 2000 |
| Trichoplusia ni cytoplasmic polyhedrosis virus 15    | RNA 11    | NC_002566 | 200 nt    | Aug 14 2000 |
| Tula virus                                           | segment L | NC_005226 | 6541 nt   | Nov 21 2003 |
| Tula virus                                           | segment M | NC_005228 | 3694 nt   | Nov 28 2003 |
| Tula virus                                           | segment S | NC_005227 | 1831 nt   | Nov 21 2003 |
| Tulare apple mosaic virus                            | RNA 1     | NC_003833 | 3459 nt   | Feb 7 2001  |
| Tulare apple mosaic virus                            | RNA 2     | NC_003834 | 2944 nt   | Feb 7 2001  |
| Tulare apple mosaic virus                            | RNA 3     | NC_003835 | 2229 nt   | Feb 7 2001  |
| Tulip virus X                                        |           | NC_004322 | 6056 nt   | Sep 26      |

|                                               |           |           |           |             |
|-----------------------------------------------|-----------|-----------|-----------|-------------|
|                                               |           |           |           | 2002        |
| Tupaia herpesvirus                            |           | NC_002794 | 195859 nt | Mar 11 2002 |
| Tupaia paramyxovirus                          |           | NC_002199 | 17904 nt  | Apr 11 2000 |
| Tupaia rhabdovirus                            |           | NC_007020 | 11440 nt  | May 16 2005 |
| Turkey adenovirus A                           |           | NC_001958 | 26263 nt  | Oct 19 1998 |
| Turkey astrovirus                             |           | NC_002470 | 7003 nt   | Jun 10 2003 |
| Turkey astrovirus 2                           |           | NC_005790 | 7355 nt   | Mar 8 2004  |
| Turnip crinkle virus                          |           | NC_003821 | 4050 nt   | Aug 3 1993  |
| Turnip crinkle virus satellite RNA            |           | NC_004033 | 230 nt    | Apr 3 1989  |
| Turnip crinkle virus virulent satellite RNA C |           | NC_006451 | 355 nt    | Apr 3 1989  |
| Turnip mosaic virus                           |           | NC_002509 | 9835 nt   | Nov 15 2002 |
| Turnip rosette virus                          |           | NC_004553 | 4037 nt   | Nov 19 2003 |
| Turnip vein-clearing virus                    |           | NC_001873 | 6311 nt   | Nov 11 1993 |
| Turnip yellow mosaic virus                    |           | NC_004063 | 6318 nt   | Nov 8 2002  |
| Turnip yellows virus                          |           | NC_003743 | 5641 nt   | Nov 17 1988 |
| UR2 sarcoma virus                             |           | NC_001618 | 3166 nt   | Apr 27 1993 |
| Ustilago maydis virus H1                      |           | NC_003823 | 6099 nt   | Dec 7 1994  |
| Usutu virus                                   |           | NC_006551 | 11066 nt  | Dec 17 2004 |
| Uukuniemi virus                               | segment L | NC_005214 | 6423 nt   | Nov 18 2003 |
| Uukuniemi virus                               | segment M | NC_005220 | 3229 nt   | Nov 18 2003 |
| Uukuniemi virus                               | segment S | NC_005221 | 1720 nt   | Nov 18 2003 |
| Vaccinia virus                                |           | NC_006998 | 194711 nt | May 19 2005 |
| Variola virus                                 |           | NC_001611 | 185578 nt | May 4 1993  |
| Varroa destructor virus 1                     |           | NC_006494 | 10112 nt  | Jun 6 2003  |
| Velvet tobacco mottle virus Satellite RNA     |           | NC_003906 | 366 nt    | Aug 2 1993  |
| Venezuelan equine encephalitis virus          |           | NC_001449 | 11444 nt  | Apr 8 2003  |
| Vernonia yellow vein virus                    |           | NC_007730 | 2745 nt   | Jan 25 2006 |
| Vesicular exanthema of swine virus            |           | NC_002551 | 8284 nt   | Feb 14 2003 |
| Vesicular stomatitis Indiana virus            |           | NC_001560 | 11161 nt  | Jan 12 2004 |

|                                        |       |           |           |             |
|----------------------------------------|-------|-----------|-----------|-------------|
| Vicia cryptic virus                    | RNA1  | NC_007241 | 2012 nt   | Aug 2 2005  |
| Vicia cryptic virus                    | RNA2  | NC_007242 | 1779 nt   | Aug 2 2005  |
| Vicia faba endornavirus                |       | NC_007648 | 17635 nt  | Jun 2 1998  |
| Viral hemorrhagic septicemia virus     |       | NC_000855 | 11158 nt  | Jun 9 1999  |
| Visna virus                            |       | NC_001452 | 9202 nt   | Jun 12 1993 |
| Walleye dermal sarcoma virus           |       | NC_001867 | 12708 nt  | Jan 21 1998 |
| Walrus calicivirus                     |       | NC_004541 | 8289 nt   | Feb 14 2003 |
| Watermelon chlorotic stunt virus       | DNA A | NC_003708 | 2745 nt   | Dec 13 2000 |
| Watermelon chlorotic stunt virus       | DNA B | NC_003709 | 2753 nt   | Dec 13 2000 |
| Watermelon mosaic virus                |       | NC_006262 | 10035 nt  | Sep 9 2004  |
| Watermelon silver mottle virus         | L     | NC_003832 | 8917 nt   | Jan 2 2001  |
| Watermelon silver mottle virus         | M     | NC_003841 | 4880 nt   | Feb 1 1997  |
| Watermelon silver mottle virus         | S     | NC_003843 | 3534 nt   | Nov 27 1996 |
| West Nile virus                        |       | NC_001563 | 10962 nt  | Jan 14 2003 |
| Western equine encephalomyelitis virus |       | NC_003908 | 11484 nt  | Apr 8 2003  |
| Wheat dwarf virus                      |       | NC_003326 | 2750 nt   | Dec 19 2001 |
| Wheat streak mosaic virus              |       | NC_001886 | 9384 nt   | Nov 15 2002 |
| Wheat yellow mosaic virus              | RNA 1 | NC_002350 | 7636 nt   | Nov 15 2002 |
| Wheat yellow mosaic virus              | RNA 2 | NC_002349 | 3659 nt   | Nov 15 2002 |
| White clover cryptic virus 1           | RNA 1 | NC_006275 | 1955 nt   | Sep 14 2004 |
| White clover cryptic virus 1           | RNA 2 | NC_006276 | 1708 nt   | Sep 14 2004 |
| White clover mosaic virus              |       | NC_003820 | 5845 nt   | Aug 10 1988 |
| Wild potato mosaic virus               |       | NC_004426 | 9878 nt   | Jan 13 2004 |
| Wisteria vein mosaic virus             |       | NC_007216 | 9695 nt   | Jul 1 2005  |
| Woodchuck hepatitis B virus            |       | NC_004107 | 3323 nt   | Dec 3 2003  |
| Woolly monkey hepatitis B Virus        |       | NC_001896 | 3179 nt   | May 22 1998 |
| Woolly monkey sarcoma virus            |       | NC_001514 | 8785 nt   | May 16 1995 |
| Xenotropic MuLV-related virus VP62     |       | NC_007815 | 8185 nt   | Mar 16 2006 |
| Xestia c-nigrum granulovirus           |       | NC_002331 | 178733 nt | Jun 7 2000  |
| Yaba monkey tumor virus                |       | NC_005179 | 134721 nt | Nov 8 2003  |
| Yaba-like disease virus                |       | NC_002642 | 144575 nt | Jan 6 2001  |
| Yam mosaic virus                       |       | NC_004752 | 9608 nt   | Jun 4 2004  |

|                                              |    |           |          |                |
|----------------------------------------------|----|-----------|----------|----------------|
| Yellow fever virus                           |    | NC_002031 | 10862 nt | Jan 14<br>2003 |
| Yokose virus                                 |    | NC_005039 | 10857 nt | Jul 17<br>2003 |
| Youcai mosaic virus                          |    | NC_004422 | 6303 nt  | Nov 20<br>2002 |
| Yunnan orbivirus                             | 1  | NC_007656 | 3993 nt  | Nov 23<br>2005 |
| Yunnan orbivirus                             | 10 | NC_007665 | 825 nt   | Nov 23<br>2005 |
| Yunnan orbivirus                             | 2  | NC_007657 | 2900 nt  | Nov 23<br>2005 |
| Yunnan orbivirus                             | 3  | NC_007658 | 2688 nt  | Nov 23<br>2005 |
| Yunnan orbivirus                             | 4  | NC_007659 | 1993 nt  | Nov 23<br>2005 |
| Yunnan orbivirus                             | 5  | NC_007660 | 1957 nt  | Nov 23<br>2005 |
| Yunnan orbivirus                             | 6  | NC_007661 | 1683 nt  | Nov 23<br>2005 |
| Yunnan orbivirus                             | 7  | NC_007662 | 1504 nt  | Nov 23<br>2005 |
| Yunnan orbivirus                             | 8  | NC_007663 | 1191 nt  | Nov 23<br>2005 |
| Yunnan orbivirus                             | 9  | NC_007664 | 1082 nt  | Nov 23<br>2005 |
| Zaire ebolavirus                             |    | NC_002549 | 18959 nt | Feb 10<br>1999 |
| Zinnia leaf curl disease associated sequence |    | NC_005047 | 1350 nt  | Jul 29<br>2003 |
| Zinnia leaf curl virus-associated DNA beta   |    | NC_005874 | 1354 nt  | May 14<br>2004 |
| Zucchini green mottle mosaic virus           |    | NC_003878 | 6513 nt  | Oct 29<br>2001 |
| Zucchini yellow mosaic virus                 |    | NC_003224 | 9591 nt  | Nov 15<br>2002 |
| Zygocactus virus X                           |    | NC_006059 | 6624 nt  | Jul 21<br>2004 |
| Zygosaccharomyces bailii virus Z             |    | NC_003874 | 3157 nt  | Mar 2<br>2000  |
